# Supplementary material
Source: publisher site journal article supplement (https://www.dovepress.com/article/456171)

SUPPLEMENTAL MATERIAL

**Evaluation of left truncation and censoring when  
changing the use of the International Classification of  
Diseases Eighth Revision codes to Tenth Revision codes  
in the Danish National Patient Registry**

**Authors:**

Søren Korsgaard;<sup>1</sup> Frederikke Schønfeldt Troelsen;<sup>1</sup> Katalin Veres;<sup>1</sup> Cecilia Hvitfeldt Fuglsang;<sup>1</sup>

Henrik Toft Sørensen<sup>1</sup>

**Affiliations:**

<sup>1</sup>Department of Clinical Epidemiology, Aarhus University Hospital and Aarhus University,

Aarhus, Denmark

**Correspondance:**

Søren Korsgaard

Email: [soren.korsgaard@clin.au.dk](mailto:soren.korsgaard@clin.au.dk)

Address: Olof Palmes Allé 43–45, 8200 Aarhus N, Aarhus, Denmark

Tlf: +45 87167212

# Contents

|                                                           |           |
|-----------------------------------------------------------|-----------|
| <b>INTERACTIVE VERSION</b>                                | <b>5</b>  |
| <b>TABLES</b>                                             | <b>6</b>  |
| <b>Table S1.</b> Codebook . . . . .                       | 6         |
| <b>Table S2.</b> Overall . . . . .                        | 7         |
| <b>Table S3.</b> Age group . . . . .                      | 10        |
| <b>Table S4.</b> Sex . . . . .                            | 19        |
| <b>FIGURES</b>                                            | <b>24</b> |
| <b>Formulas</b> . . . . .                                 | 24        |
| <b>Figure S1</b> . . . . .                                | 24        |
| <b>Overall</b> . . . . .                                  | 25        |
| <b>Figure S2.</b> Cardiovascular diseases. . . . .        | 26        |
| <b>Figure S3.</b> Endocrine diseases. . . . .             | 27        |
| <b>Figure S4.</b> Gastrointestinal diseases. . . . .      | 28        |
| <b>Figure S5.</b> Neurological diseases. . . . .          | 29        |
| <b>Figure S6.</b> Fractures. . . . .                      | 30        |
| <b>Figure S7.</b> Pulmonary diseases. . . . .             | 31        |
| <b>Figure S8.</b> Rheumatic diseases. . . . .             | 32        |
| <b>Figure S9.</b> Urogenital diseases. . . . .            | 33        |
| <b>Stratified by age groups</b> . . . . .                 | 34        |
| <b>Figure S10–S15.</b> Cardiovascular diseases. . . . .   | 34        |
| <b>Figure S10.</b> Acute myocardial infarction. . . . .   | 34        |
| <b>Figure S11.</b> Atrial fibrillation. . . . .           | 35        |
| <b>Figure S12.</b> Dyslipidemia. . . . .                  | 36        |
| <b>Figure S13.</b> Heart failure. . . . .                 | 37        |
| <b>Figure S14.</b> Hypertension. . . . .                  | 38        |
| <b>Figure S15.</b> Peripheral vascular disease. . . . .   | 39        |
| <b>Figure S16.</b> Endocrine diseases. . . . .            | 40        |
| <b>Figure S16.</b> Diabetes mellitus. . . . .             | 40        |
| <b>Figure S17–S24.</b> Gastrointestinal diseases. . . . . | 41        |

|                                                               |    |
|---------------------------------------------------------------|----|
| <b>Figure S17.</b> Appendicitis. . . . .                      | 41 |
| <b>Figure S18.</b> Cholecystitis. . . . .                     | 42 |
| <b>Figure S19.</b> Diverticular disease of intestine. . . . . | 43 |
| <b>Figure S20.</b> Inflammatory bowel disease. . . . .        | 44 |
| <b>Figure S21.</b> Liver disease. . . . .                     | 45 |
| <b>Figure S22.</b> Pancreatitis. . . . .                      | 46 |
| <b>Figure S23.</b> Ulcer disease. . . . .                     | 47 |
| <b>Figure S24.</b> Upper gastrointestinal bleeding. . . . .   | 48 |
| <b>Figure S25–26.</b> Neurological diseases. . . . .          | 49 |
| <b>Figure S25.</b> Dementia. . . . .                          | 49 |
| <b>Figure S26.</b> Stroke. . . . .                            | 50 |
| <b>Figure S27–S29.</b> Fractures. . . . .                     | 51 |
| <b>Figure S27.</b> Fracture of femur. . . . .                 | 51 |
| <b>Figure S28.</b> Fracture of neck and trunk. . . . .        | 52 |
| <b>Figure S29.</b> Fracture of upper limb. . . . .            | 53 |
| <b>Figure S30.</b> Pulmonary diseases. . . . .                | 54 |
| <b>Figure S30.</b> Chronic pulmonary disease. . . . .         | 54 |
| <b>Figure S31–34.</b> Rheumatic diseases. . . . .             | 55 |
| <b>Figure S31.</b> Ankylosing spondylitis. . . . .            | 55 |
| <b>Figure S32.</b> Systemic lupus erythematosus. . . . .      | 56 |
| <b>Figure S33.</b> Psoriatic arthritis. . . . .               | 57 |
| <b>Figure S34.</b> Rheumatic arthritis. . . . .               | 58 |
| <b>Figure S35–S36.</b> Urogenital diseases. . . . .           | 59 |
| <b>Figure S35.</b> Pyelonephritis. . . . .                    | 59 |
| <b>Figure S36.</b> Renal disease. . . . .                     | 60 |
| <b>Stratified by sex</b> . . . . .                            | 61 |
| <b>Figure S37.</b> Cardiovascular diseases. . . . .           | 61 |
| <b>Figure S38.</b> Endocrine diseases. . . . .                | 62 |
| <b>Figure S39.</b> Gastrointestinal diseases. . . . .         | 63 |
| <b>Figure S40.</b> Neurological diseases. . . . .             | 64 |
| <b>Figure S41.</b> Fractures. . . . .                         | 65 |
| <b>Figure S42.</b> Pulmonary diseases. . . . .                | 66 |

|                                                 |    |
|-------------------------------------------------|----|
| <b>Figure S43.</b> Rheumatic diseases. . . . .  | 67 |
| <b>Figure S44.</b> Urogenital diseases. . . . . | 68 |

## **INTERACTIVE VERSION**

Click [here](#) for an interactive version of the Supplemental Material

# TABLES

## Table S1. Codebook

|                                 | ICD-8                                                                                                         | ICD-10                                                                                                                       |
|---------------------------------|---------------------------------------------------------------------------------------------------------------|------------------------------------------------------------------------------------------------------------------------------|
| <b>Cardiovascular</b>           |                                                                                                               |                                                                                                                              |
| Myocardial infarction           | 410                                                                                                           | I21, I22, I23                                                                                                                |
| Atrial fibrillation/flutter     | 427.93, 427.94                                                                                                | I48                                                                                                                          |
| Heart failure                   | 427.09, 427.10, 427.11, 427.19, 428.99, 782.49                                                                | I50, I11.0, I13.0, I13.2, I42.0, I42.6, I42.7, I42.8, I42.9                                                                  |
| Dyslipidemia                    | 272.00, 279.00, 272.01, 279.01                                                                                | E78                                                                                                                          |
| Hypertension                    | 400–404                                                                                                       | I10–I15                                                                                                                      |
| Peripheral vascular disease     | 440–445                                                                                                       | I70–I74, I77                                                                                                                 |
| <b>Endocrine</b>                |                                                                                                               |                                                                                                                              |
| Diabetes mellitus               | 249.00, 249.06, 249.07, 249.09, 250.00, 250.06, 250.07, 250.09, 249.01–249.05, 249.08, 250.01–250.05, 250.08. | E10–E14, O24.0–O24.3, G63.2, H36.0, N08.3                                                                                    |
| <b>Gastrointestinal</b>         |                                                                                                               |                                                                                                                              |
| Appendicitis                    | 540                                                                                                           | K35, K36, K37                                                                                                                |
| Cholecystitis                   | 575.00, 575.01, 575.03, 575.08, 575.09                                                                        | K81                                                                                                                          |
| Diverticular disease            | 562.00, 562.08, 562.09, 562.10, 562.11, 562.12, 562.18, 562.19                                                | K57                                                                                                                          |
| Inflammatory bowel disease      | 563.01, 563.19, 569.04                                                                                        | K50, K51                                                                                                                     |
| Liver disease                   | 070.00, 070.02, 070.04, 070.06, 070.08, 456.00–456.09, 571, 573.00, 573.01, 573.04                            | B15.0, B16.0, B16.2, B18, B19.0, I85, K70.0–K70.4, K70.9, K71–K74, K75.4, K76.0, K76.6                                       |
| Pancreatitis                    | 577.04, 577.08, 577.09                                                                                        | K85, K86                                                                                                                     |
| Ulcer disease                   | 530.91, 530.98, 531–534                                                                                       | K22.1, K25–K28, K29.3–K29.5                                                                                                  |
| Upper gastrointestinal bleeding | 530.98, 531.90, 531.92, 531.95, 532.90, 533.90, 534.90, 535.01, 456.01                                        | I85.0, K25.0, K25.2, K25.4, K25.6, K26.0, K26.2, K26.4, K26.6, K27.0, K27.2, K27.4, K27.6, K28.0, K28.2, K28.4, K28.6, K29.0 |
| <b>Neurological</b>             |                                                                                                               |                                                                                                                              |
| Dementia                        | 290.09–290.19, 293.09                                                                                         | F00–F03, F05.1, G30                                                                                                          |
| Stroke                          | 430, 431, 433, 434, 436                                                                                       | I60, I61, I63, I64                                                                                                           |
| <b>Fractures</b>                |                                                                                                               |                                                                                                                              |
| Fracture of neck and trunk      | 805–809                                                                                                       | S12.0, S12.1, S12.2, S12.7, S12.9, S22.0, S22.1, T08, S32x                                                                   |
| Fracture of upper limb          | 810–818                                                                                                       | S42.2, S42.3, S42.4, S42.7, S42.8, S52.x, S62.x                                                                              |
| Fracture of femur               | 820, 821                                                                                                      | S72.x                                                                                                                        |
| <b>Pulmonary</b>                |                                                                                                               |                                                                                                                              |
| Chronic pulmonary disease       | 490–493, 515–518                                                                                              | J40–J47, J60–J67, J68.4, J70.1, J70.3, J84.1, J92.0, J96.1, J98.2, J98.3.                                                    |
| <b>Rheumatic</b>                |                                                                                                               |                                                                                                                              |
| Rheumatic arthritis             | 712.39                                                                                                        | M05.3, M05.8, M05.9, M06.9                                                                                                   |
| Psoriatic arthritis             | 696.09                                                                                                        | M07.0–M07.3, L40.5                                                                                                           |
| Ankylosing spondylitis          | 712.49                                                                                                        | M45, M46.0, M46.1, M46.8A, M46.9                                                                                             |
| Systemic lupus erythematosus    | 734.19                                                                                                        | M32.1, M32.8, M32.9                                                                                                          |
| <b>Urogenital</b>               |                                                                                                               |                                                                                                                              |
| Renal disease                   | 403, 404, 580–584, 590.09, 593.19, 593.20, 753.10–753.19, 792                                                 | I12, I13, I15.0, I15.1, N00–N05, N07, N11, N14, N15.0, N17–N19, Q61                                                          |
| Pyelonephritis                  | 590.10, 590.13, 590.15, 590.19                                                                                | N10, N11, N12.9, N13.6                                                                                                       |

## Table S2. Overall

Proportion of persons with records of diagnoses identified by ICD-8, ICD-10, or both. By disease and sample year.

| Disease               | Year | Proportion of sample,% |                      |                    |                   | Proportion of diseased,% |                      |                    |                   |
|-----------------------|------|------------------------|----------------------|--------------------|-------------------|--------------------------|----------------------|--------------------|-------------------|
|                       |      | ICD-8<br>(95% CI)      | ICD-8+10<br>(95% CI) | ICD-10<br>(95% CI) | Total<br>(95% CI) | ICD-8<br>(95% CI)        | ICD-8+10<br>(95% CI) | ICD-10<br>(95% CI) | Total<br>(95% CI) |
| <b>Cardiovascular</b> |      |                        |                      |                    |                   |                          |                      |                    |                   |
| All                   | 1995 | 5.2 (5.1–5.2)          | 1.3 (1.3–1.3)        | 1.9 (1.9–2)        | 8.4 (8.3–8.5)     | 61.4 (60.9–61.9)         | 15.5 (15.2–15.9)     | 23.1 (22.7–23.5)   | 100 (100–100)     |
| All                   | 2010 | 0.5 (0.5–0.5)          | 1.2 (1.1–1.2)        | 17.3 (17.2–17.4)   | 19 (18.9–19.1)    | 2.7 (2.6–2.8)            | 6.2 (6–6.4)          | 91.1 (90.9–91.2)   | 100 (100–100)     |
| All                   | 2018 | 0.2 (0.2–0.2)          | 0.7 (0.6–0.7)        | 23.2 (23.1–23.3)   | 24 (23.9–24.1)    | 0.8 (0.8–0.9)            | 2.7 (2.6–2.8)        | 96.4 (96.3–96.5)   | 100 (100–100)     |
| AMI                   | 1995 | 2 (2–2.1)              | 0.2 (0.1–0.2)        | 0.5 (0.4–0.5)      | 2.6 (2.6–2.6)     | 77 (76.3–77.7)           | 5.7 (5.3–6.1)        | 17.3 (16.6–17.9)   | 100 (100–100)     |
| AMI                   | 2010 | 0.4 (0.3–0.4)          | 0.2 (0.1–0.2)        | 2.8 (2.7–2.8)      | 3.3 (3.3–3.3)     | 10.8 (10.3–11.2)         | 4.7 (4.4–5)          | 84.5 (84–85.1)     | 100 (100–100)     |
| AMI                   | 2018 | 0.1 (0.1–0.1)          | 0.1 (0.1–0.1)        | 3.1 (3–3.1)        | 3.3 (3.3–3.3)     | 3.9 (3.6–4.2)            | 2.1 (1.9–2.3)        | 94 (93.7–94.4)     | 100 (100–100)     |
| Atrial fibrillation   | 1995 | 0.9 (0.9–0.9)          | 0.2 (0.2–0.2)        | 0.5 (0.5–0.5)      | 1.6 (1.6–1.6)     | 55.9 (54.8–57)           | 14.1 (13.4–14.9)     | 29.9 (28.9–31)     | 100 (100–100)     |
| Atrial fibrillation   | 2010 | 0.1 (0–0.1)            | 0.1 (0.1–0.1)        | 3.7 (3.6–3.8)      | 3.9 (3.8–4)       | 1.4 (1.3–1.6)            | 3.5 (3.3–3.8)        | 95 (94.7–95.3)     | 100 (100–100)     |
| Atrial fibrillation   | 2018 | 0 (0–0)                | 0.1 (0.1–0.1)        | 5.2 (5.2–5.3)      | 5.3 (5.2–5.4)     | 0.4 (0.4–0.5)            | 1.3 (1.2–1.4)        | 98.3 (98.1–98.4)   | 100 (100–100)     |
| Dyslipidemia          | 1995 | 0.2 (0.2–0.2)          | 0 (0–0)              | 0.2 (0.2–0.2)      | 0.4 (0.4–0.4)     | 50.2 (48.1–52.3)         | 8.6 (7.4–9.8)        | 41.2 (39.1–43.2)   | 100 (100–100)     |
| Dyslipidemia          | 2010 | 0.1 (0.1–0.1)          | 0.1 (0.1–0.1)        | 4.7 (4.7–4.8)      | 4.8 (4.7–4.9)     | 1.2 (1.1–1.3)            | 1.4 (1.3–1.6)        | 97.4 (97.2–97.6)   | 100 (100–100)     |
| Dyslipidemia          | 2018 | 0 (0–0)                | 0 (0–0.1)            | 7 (7–7.1)          | 7.1 (7–7.2)       | 0.4 (0.3–0.5)            | 0.7 (0.6–0.8)        | 98.9 (98.8–99)     | 100 (100–100)     |
| Heart failure         | 1995 | 0.9 (0.9–0.9)          | 0.2 (0.2–0.2)        | 0.6 (0.6–0.6)      | 1.7 (1.7–1.7)     | 53.7 (52.7–54.8)         | 11.9 (11.2–12.6)     | 34.4 (33.4–35.4)   | 100 (100–100)     |
| Heart failure         | 2010 | 0.1 (0–0.1)            | 0 (0–0)              | 2.3 (2.3–2.4)      | 2.4 (2.4–2.4)     | 2.2 (1.9–2.5)            | 1.4 (1.2–1.6)        | 96.4 (96–96.7)     | 100 (100–100)     |
| Heart failure         | 2018 | 0 (0–0)                | 0 (0–0)              | 2.6 (2.5–2.6)      | 2.6 (2.6–2.6)     | 0.8 (0.7–1)              | 0.4 (0.3–0.5)        | 98.8 (98.6–99)     | 100 (100–100)     |
| Hypertension          | 1995 | 2 (2–2.1)              | 0.3 (0.3–0.3)        | 0.7 (0.7–0.7)      | 3 (3–3)           | 67.1 (66.4–67.9)         | 9 (8.5–9.4)          | 23.9 (23.2–24.6)   | 100 (100–100)     |
| Hypertension          | 2010 | 0.3 (0.3–0.3)          | 0.5 (0.4–0.5)        | 11.4 (11.3–11.5)   | 12.2 (12.1–12.3)  | 2.3 (2.2–2.4)            | 3.8 (3.7–4)          | 93.9 (93.7–94.1)   | 100 (100–100)     |
| Hypertension          | 2018 | 0.1 (0.1–0.1)          | 0.3 (0.3–0.3)        | 16.3 (16.2–16.4)   | 16.7 (16.6–16.8)  | 0.7 (0.6–0.7)            | 1.8 (1.7–1.9)        | 97.5 (97.4–97.6)   | 100 (100–100)     |
| PAD                   | 1995 | 0.9 (0.9–0.9)          | 0.2 (0.2–0.2)        | 0.4 (0.4–0.5)      | 1.6 (1.6–1.6)     | 57.9 (56.8–59)           | 14.2 (13.4–15)       | 27.9 (26.9–28.9)   | 100 (100–100)     |
| PAD                   | 2010 | 0.1 (0.1–0.2)          | 0.1 (0.1–0.1)        | 2.6 (2.6–2.7)      | 2.9 (2.9–2.9)     | 4.9 (4.6–5.3)            | 3.6 (3.3–3.9)        | 91.5 (91–91.9)     | 100 (100–100)     |
| PAD                   | 2018 | 0.1 (0.1–0.1)          | 0 (0–0.1)            | 3.4 (3.3–3.4)      | 3.5 (3.4–3.6)     | 2.3 (2–2.5)              | 1.3 (1.2–1.5)        | 96.4 (96.1–96.7)   | 100 (100–100)     |
| <b>Endocrine</b>      |      |                        |                      |                    |                   |                          |                      |                    |                   |
| Diabetes mellitus     | 1995 | 1.3 (1.3–1.3)          | 0.5 (0.5–0.5)        | 0.4 (0.4–0.4)      | 2.2 (2.2–2.2)     | 59.1 (58.2–60)           | 21.8 (21–22.6)       | 19.1 (18.4–19.8)   | 100 (100–100)     |
| Diabetes mellitus     | 2010 | 0.2 (0.1–0.2)          | 0.5 (0.5–0.5)        | 3.9 (3.9–4)        | 4.6 (4.5–4.7)     | 3.5 (3.2–3.7)            | 10.8 (10.4–11.2)     | 85.8 (85.3–86.2)   | 100 (100–100)     |
| Diabetes mellitus     | 2018 | 0.1 (0.1–0.1)          | 0.4 (0.4–0.4)        | 5.2 (5.2–5.3)      | 5.7 (5.6–5.8)     | 1.6 (1.5–1.8)            | 6.5 (6.2–6.8)        | 91.9 (91.5–92.2)   | 100 (100–100)     |
| <b>Fractures</b>      |      |                        |                      |                    |                   |                          |                      |                    |                   |
| All                   | 1995 | 3.7 (3.6–3.7)          | 0.4 (0.4–0.5)        | 1.6 (1.6–1.7)      | 5.8 (5.7–5.9)     | 64 (63.4–64.5)           | 7.6 (7.3–7.9)        | 28.4 (27.9–28.9)   | 100 (100–100)     |
| All                   | 2010 | 1.9 (1.9–1.9)          | 0.7 (0.7–0.7)        | 12.4 (12.4–12.5)   | 15 (14.9–15.1)    | 12.7 (12.4–12.9)         | 4.6 (4.4–4.7)        | 82.7 (82.5–83)     | 100 (100–100)     |
| All                   | 2018 | 2 (2–2)                | 0.8 (0.7–0.8)        | 16.9 (16.8–17)     | 19.7 (19.6–19.8)  | 10.1 (9.9–10.3)          | 3.9 (3.8–4)          | 86 (85.7–86.2)     | 100 (100–100)     |
| Femur                 | 1995 | 1.3 (1.3–1.3)          | 0.2 (0.2–0.2)        | 0.5 (0.4–0.5)      | 1.9 (1.9–1.9)     | 67.3 (66.3–68.2)         | 8.9 (8.4–9.5)        | 23.8 (22.9–24.6)   | 100 (100–100)     |
| Femur                 | 2010 | 0.3 (0.3–0.3)          | 0.1 (0.1–0.1)        | 1.7 (1.7–1.7)      | 2.1 (2.1–2.1)     | 15.7 (15–16.4)           | 3.5 (3.2–3.9)        | 80.8 (80–81.5)     | 100 (100–100)     |
| Femur                 | 2018 | 0.3 (0.3–0.3)          | 0.1 (0–0.1)          | 1.8 (1.8–1.8)      | 2.2 (2.2–2.2)     | 14.8 (14.2–15.5)         | 2.5 (2.2–2.8)        | 82.7 (82–83.4)     | 100 (100–100)     |
| Neck and trunk        | 1995 | 1.2 (1.2–1.2)          | 0 (0–0)              | 0.2 (0.2–0.2)      | 1.4 (1.4–1.4)     | 85.8 (85–86.6)           | 2 (1.7–2.3)          | 12.2 (11.5–13)     | 100 (100–100)     |
| Neck and trunk        | 2010 | 0.7 (0.7–0.7)          | 0.1 (0.1–0.1)        | 1.2 (1.1–1.2)      | 1.9 (1.9–1.9)     | 36.6 (35.7–37.6)         | 3 (2.6–3.3)          | 60.4 (59.4–61.4)   | 100 (100–100)     |
| Neck and trunk        | 2018 | 0.5 (0.5–0.6)          | 0 (0–0.1)            | 1.8 (1.7–1.8)      | 2.3 (2.3–2.3)     | 23 (22.3–23.8)           | 2.1 (1.8–2.3)        | 74.9 (74.1–75.7)   | 100 (100–100)     |
| Upper limb            | 1995 | 1.9 (1.8–1.9)          | 0.1 (0.1–0.1)        | 1.2 (1.2–1.3)      | 3.2 (3.2–3.2)     | 58 (57.2–58.8)           | 3.8 (3.5–4.1)        | 38.2 (37.5–39)     | 100 (100–100)     |

|                         |      |               |               |                  |                  |                  |                  |                  |               |
|-------------------------|------|---------------|---------------|------------------|------------------|------------------|------------------|------------------|---------------|
| Upper limb              | 2010 | 1.3 (1.3–1.3) | 0.4 (0.3–0.4) | 10.9 (10.8–10.9) | 12.5 (12.4–12.6) | 10.5 (10.3–10.8) | 2.9 (2.7–3)      | 86.6 (86.4–86.9) | 100 (100–100) |
| Upper limb              | 2018 | 1.5 (1.5–1.6) | 0.5 (0.5–0.5) | 15 (14.9–15.1)   | 17 (16.9–17.1)   | 9 (8.8–9.2)      | 2.8 (2.7–2.9)    | 88.2 (88–88.4)   | 100 (100–100) |
| <b>Gastrointestinal</b> |      |               |               |                  |                  |                  |                  |                  |               |
| All                     | 1995 | 4.9 (4.9–5)   | 0.5 (0.5–0.6) | 1.1 (1–1.1)      | 6.5 (6.4–6.6)    | 75.4 (75–75.9)   | 8.4 (8.1–8.7)    | 16.2 (15.8–16.6) | 100 (100–100) |
| All                     | 2010 | 3 (3–3.1)     | 0.8 (0.8–0.8) | 7.7 (7.7–7.8)    | 11.6 (11.5–11.7) | 26.2 (25.8–26.5) | 7 (6.8–7.3)      | 66.8 (66.4–67.2) | 100 (100–100) |
| All                     | 2018 | 2.9 (2.9–3)   | 0.8 (0.8–0.8) | 11.8 (11.7–11.9) | 15.6 (15.5–15.7) | 18.9 (18.7–19.2) | 5.1 (4.9–5.2)    | 76 (75.7–76.3)   | 100 (100–100) |
| Appendicitis            | 1995 | 1.3 (1.3–1.3) | 0 (0–0)       | 0.1 (0.1–0.1)    | 1.4 (1.4–1.4)    | 93 (92.4–93.6)   | 0.2 (0.1–0.3)    | 6.8 (6.2–7.4)    | 100 (100–100) |
| Appendicitis            | 2010 | 2.2 (2.1–2.2) | 0 (0–0)       | 1.3 (1.2–1.3)    | 3.4 (3.3–3.5)    | 62.6 (61.9–63.4) | 0.1 (0.1–0.2)    | 37.2 (36.5–38)   | 100 (100–100) |
| Appendicitis            | 2018 | 2.6 (2.6–2.7) | 0 (0–0)       | 2.2 (2.2–2.3)    | 4.9 (4.8–5)      | 54 (53.4–54.6)   | 0.1 (0.1–0.1)    | 45.9 (45.3–46.5) | 100 (100–100) |
| Cholecystitis           | 1995 | 0.4 (0.4–0.5) | 0 (0–0)       | 0.1 (0–0.1)      | 0.5 (0.5–0.5)    | 89 (87.8–90.3)   | 0.6 (0.3–0.9)    | 10.4 (9.2–11.6)  | 100 (100–100) |
| Cholecystitis           | 2010 | 0.2 (0.2–0.2) | 0 (0–0)       | 0.5 (0.5–0.5)    | 0.7 (0.7–0.7)    | 26.9 (25.4–28.4) | 0.3 (0.1–0.5)    | 72.8 (71.3–74.3) | 100 (100–100) |
| Cholecystitis           | 2018 | 0.1 (0.1–0.1) | 0 (0–0)       | 0.8 (0.7–0.8)    | 0.9 (0.9–0.9)    | 13.2 (12.2–14.2) | 0.2 (0.1–0.4)    | 86.6 (85.6–87.6) | 100 (100–100) |
| Diverticular disease    | 1995 | 0.8 (0.8–0.8) | 0.1 (0–0.1)   | 0.2 (0.2–0.2)    | 1 (1–1)          | 75.7 (74.6–76.9) | 5 (4.5–5.6)      | 19.2 (18.2–20.3) | 100 (100–100) |
| Diverticular disease    | 2010 | 0.1 (0.1–0.2) | 0.1 (0.1–0.1) | 2.1 (2–2.1)      | 2.3 (2.3–2.3)    | 6.2 (5.8–6.7)    | 2.6 (2.3–2.9)    | 91.2 (90.6–91.7) | 100 (100–100) |
| Diverticular disease    | 2018 | 0.1 (0.1–0.1) | 0 (0–0)       | 4.3 (4.2–4.3)    | 4.4 (4.3–4.5)    | 1.4 (1.2–1.5)    | 0.9 (0.8–1)      | 97.8 (97.6–97.9) | 100 (100–100) |
| IBD                     | 1995 | 0.2 (0.2–0.2) | 0.1 (0.1–0.1) | 0.1 (0.1–0.1)    | 0.4 (0.4–0.4)    | 42.8 (40.7–44.9) | 31.9 (29.9–33.9) | 25.3 (23.4–27.1) | 100 (100–100) |
| IBD                     | 2010 | 0.1 (0.1–0.1) | 0.2 (0.2–0.2) | 0.8 (0.8–0.8)    | 1.1 (1.1–1.1)    | 8 (7.3–8.8)      | 18.8 (17.8–19.8) | 73.1 (72–74.3)   | 100 (100–100) |
| IBD                     | 2018 | 0.1 (0.1–0.1) | 0.2 (0.2–0.2) | 1.3 (1.3–1.3)    | 1.6 (1.6–1.6)    | 4 (3.6–4.5)      | 12.3 (11.6–13.1) | 83.6 (82.8–84.5) | 100 (100–100) |
| Liver disease           | 1995 | 0.4 (0.3–0.4) | 0.1 (0.1–0.1) | 0.1 (0.1–0.1)    | 0.6 (0.6–0.6)    | 62.7 (60.9–64.5) | 14.9 (13.6–16.2) | 22.4 (20.9–23.9) | 100 (100–100) |
| Liver disease           | 2010 | 0.1 (0.1–0.1) | 0 (0–0)       | 1 (0.9–1)        | 1.1 (1.1–1.1)    | 10 (9.2–10.8)    | 3.8 (3.3–4.3)    | 86.2 (85.3–87.1) | 100 (100–100) |
| Liver disease           | 2018 | 0.1 (0.1–0.1) | 0 (0–0)       | 1.3 (1.3–1.4)    | 1.4 (1.4–1.4)    | 5 (4.5–5.5)      | 2 (1.7–2.3)      | 93 (92.4–93.6)   | 100 (100–100) |
| Pancreatitis            | 1995 | 0.3 (0.3–0.3) | 0 (0–0.1)     | 0.1 (0.1–0.1)    | 0.4 (0.4–0.4)    | 63.2 (61.1–65.2) | 10.9 (9.6–12.3)  | 25.9 (24–27.8)   | 100 (100–100) |
| Pancreatitis            | 2010 | 0.1 (0.1–0.1) | 0 (0–0)       | 0.7 (0.7–0.7)    | 0.8 (0.8–0.8)    | 14 (12.9–15)     | 4.2 (3.6–4.8)    | 81.9 (80.7–83)   | 100 (100–100) |
| Pancreatitis            | 2018 | 0.1 (0.1–0.1) | 0 (0–0)       | 1 (1–1)          | 1.1 (1.1–1.1)    | 6.5 (5.8–7.1)    | 2.5 (2.1–2.9)    | 91 (90.3–91.8)   | 100 (100–100) |
| UGB                     | 1995 | 0.7 (0.7–0.7) | 0 (0–0)       | 0.2 (0.2–0.2)    | 0.9 (0.9–0.9)    | 79.3 (78.1–80.5) | 2.4 (1.9–2.8)    | 18.4 (17.2–19.5) | 100 (100–100) |
| UGB                     | 2010 | 0.2 (0.2–0.2) | 0 (0–0)       | 0.8 (0.7–0.8)    | 1 (1–1)          | 21.5 (20.3–22.6) | 2.5 (2–2.9)      | 76.1 (74.9–77.3) | 100 (100–100) |
| UGB                     | 2018 | 0.1 (0.1–0.1) | 0 (0–0)       | 0.7 (0.7–0.7)    | 0.9 (0.9–0.9)    | 14.8 (13.7–15.8) | 2 (1.6–2.4)      | 83.3 (82.2–84.4) | 100 (100–100) |
| Ulcer disease           | 1995 | 1.6 (1.5–1.6) | 0.1 (0.1–0.1) | 0.4 (0.4–0.4)    | 2.1 (2.1–2.1)    | 75.1 (74.3–75.9) | 4.8 (4.4–5.2)    | 20.1 (19.3–20.9) | 100 (100–100) |
| Ulcer disease           | 2010 | 0.5 (0.5–0.5) | 0.1 (0.1–0.1) | 2.2 (2.1–2.2)    | 2.8 (2.8–2.8)    | 18.1 (17.5–18.8) | 4.2 (3.9–4.5)    | 77.7 (77–78.4)   | 100 (100–100) |
| Ulcer disease           | 2018 | 0.3 (0.3–0.3) | 0.1 (0.1–0.1) | 2.5 (2.4–2.5)    | 2.9 (2.9–2.9)    | 10.4 (9.9–10.9)  | 2.7 (2.4–2.9)    | 86.9 (86.3–87.5) | 100 (100–100) |
| <b>Neurological</b>     |      |               |               |                  |                  |                  |                  |                  |               |
| All                     | 1995 | 1.6 (1.6–1.7) | 0.2 (0.2–0.2) | 0.7 (0.7–0.7)    | 2.5 (2.5–2.5)    | 65.5 (64.7–66.3) | 6.8 (6.4–7.2)    | 27.7 (26.9–28.5) | 100 (100–100) |
| All                     | 2010 | 0.2 (0.2–0.3) | 0.1 (0.1–0.1) | 4.2 (4.2–4.3)    | 4.6 (4.5–4.7)    | 5.2 (4.9–5.5)    | 2.2 (2–2.4)      | 92.6 (92.2–92.9) | 100 (100–100) |
| All                     | 2018 | 0.1 (0.1–0.1) | 0.1 (0–0.1)   | 5 (5–5.1)        | 5.2 (5.1–5.3)    | 2.4 (2.2–2.6)    | 1 (0.9–1.1)      | 96.6 (96.4–96.8) | 100 (100–100) |
| Dementia                | 1995 | 0.2 (0.2–0.3) | 0 (0–0)       | 0.2 (0.2–0.2)    | 0.4 (0.4–0.4)    | 57 (54.9–59.1)   | 4.6 (3.7–5.5)    | 38.4 (36.4–40.5) | 100 (100–100) |
| Dementia                | 2010 | 0 (0–0)       | 0 (0–0)       | 0.9 (0.8–0.9)    | 0.9 (0.9–0.9)    | 2.9 (2.4–3.4)    | 0.3 (0.2–0.5)    | 96.8 (96.3–97.3) | 100 (100–100) |
| Dementia                | 2018 | 0 (0–0)       | 0 (0–0)       | 1 (1–1)          | 1 (1–1)          | 1.1 (0.8–1.4)    | 0.1 (0–0.2)      | 98.8 (98.5–99.1) | 100 (100–100) |
| Stroke                  | 1995 | 1.4 (1.4–1.5) | 0.1 (0.1–0.1) | 0.6 (0.5–0.6)    | 2.1 (2.1–2.1)    | 67.3 (66.4–68.2) | 6.5 (6–7)        | 26.2 (25.4–27)   | 100 (100–100) |
| Stroke                  | 2010 | 0.2 (0.2–0.2) | 0.1 (0.1–0.1) | 3.6 (3.5–3.6)    | 3.9 (3.8–4)      | 5.8 (5.4–6.1)    | 2.4 (2.2–2.6)    | 91.9 (91.5–92.3) | 100 (100–100) |
| Stroke                  | 2018 | 0.1 (0.1–0.1) | 0 (0–0.1)     | 4.2 (4.2–4.3)    | 4.4 (4.3–4.5)    | 2.7 (2.5–3)      | 1 (0.9–1.2)      | 96.2 (96–96.5)   | 100 (100–100) |
| <b>Pulmonary</b>        |      |               |               |                  |                  |                  |                  |                  |               |
| CPD                     | 1995 | 1.7 (1.6–1.7) | 0.5 (0.5–0.5) | 0.8 (0.8–0.8)    | 3 (3–3)          | 55.8 (55–56.6)   | 17 (16.4–17.6)   | 27.2 (26.5–28)   | 100 (100–100) |
| CPD                     | 2010 | 0.4 (0.4–0.4) | 0.4 (0.4–0.4) | 5 (5–5.1)        | 5.8 (5.7–5.9)    | 6.9 (6.6–7.2)    | 6.9 (6.6–7.2)    | 86.2 (85.8–86.6) | 100 (100–100) |
| CPD                     | 2018 | 0.4 (0.4–0.4) | 0.4 (0.4–0.4) | 7.1 (7–7.2)      | 7.9 (7.8–8)      | 5.1 (4.9–5.4)    | 4.9 (4.6–5.1)    | 90 (89.7–90.3)   | 100 (100–100) |
| <b>Rheumatic</b>        |      |               |               |                  |                  |                  |                  |                  |               |
| All                     | 1995 | 0.3 (0.3–0.4) | 0.3 (0.2–0.3) | 0.2 (0.2–0.2)    | 0.8 (0.8–0.8)    | 42.7 (41.2–44.2) | 31.2 (29.8–32.6) | 26.1 (24.7–27.4) | 100 (100–100) |



|                     |      |               |               |               |               |                  |                  |                  |               |
|---------------------|------|---------------|---------------|---------------|---------------|------------------|------------------|------------------|---------------|
| All                 | 2010 | 0.1 (0.1–0.1) | 0.2 (0.2–0.2) | 1.3 (1.2–1.3) | 1.5 (1.5–1.5) | 5 (4.5–5.5)      | 11.2 (10.5–11.9) | 83.7 (82.9–84.6) | 100 (100–100) |
| All                 | 2018 | 0 (0–0.1)     | 0.1 (0.1–0.1) | 1.9 (1.8–1.9) | 2.1 (2.1–2.1) | 2.3 (2–2.6)      | 5.7 (5.3–6.2)    | 91.9 (91.4–92.4) | 100 (100–100) |
| Psoriatic arthritis | 1995 | 0 (0–0)       | 0 (0–0)       | 0 (0–0)       | 0.1 (0.1–0.1) | 46.2 (41.2–51.1) | 16.7 (13–20.4)   | 37.2 (32.4–42)   | 100 (100–100) |
| Psoriatic arthritis | 2010 | 0 (0–0)       | 0 (0–0)       | 0.3 (0.3–0.3) | 0.3 (0.3–0.3) | 4.3 (3.3–5.3)    | 5.3 (4.1–6.4)    | 90.5 (89–91.9)   | 100 (100–100) |
| Psoriatic arthritis | 2018 | 0 (0–0)       | 0 (0–0)       | 0.5 (0.5–0.5) | 0.5 (0.5–0.5) | 1.4 (0.9–1.8)    | 2.9 (2.3–3.6)    | 95.7 (94.9–96.5) | 100 (100–100) |
| Rheumatic arthritis | 1995 | 0.3 (0.3–0.3) | 0.2 (0.2–0.2) | 0.2 (0.1–0.2) | 0.6 (0.6–0.6) | 42.8 (41.1–44.5) | 33.1 (31.5–34.7) | 24.1 (22.6–25.6) | 100 (100–100) |
| Rheumatic arthritis | 2010 | 0.1 (0–0.1)   | 0.1 (0.1–0.1) | 0.8 (0.8–0.8) | 1 (1–1)       | 5.4 (4.7–6)      | 12.2 (11.3–13.1) | 82.4 (81.3–83.5) | 100 (100–100) |
| Rheumatic arthritis | 2018 | 0 (0–0)       | 0.1 (0.1–0.1) | 1 (1–1.1)     | 1.1 (1.1–1.1) | 2.8 (2.4–3.2)    | 6.3 (5.6–6.9)    | 90.9 (90.2–91.7) | 100 (100–100) |
| SLE                 | 1995 | 0 (0–0)       | 0 (0–0)       | 0 (0–0)       | 0 (0–0)       | 36.2 (30–42.3)   | 25.5 (20–31.1)   | 38.3 (32.1–44.5) | 100 (100–100) |
| SLE                 | 2010 | 0 (0–0)       | 0 (0–0)       | 0.1 (0.1–0.1) | 0.1 (0.1–0.1) | 7 (4.6–9.4)      | 16.3 (12.8–19.8) | 76.7 (72.8–80.7) | 100 (100–100) |
| SLE                 | 2018 | 0 (0–0)       | 0 (0–0)       | 0.1 (0.1–0.1) | 0.1 (0.1–0.1) | 4.4 (2.7–6.1)    | 10.6 (8.1–13.2)  | 85 (82–87.9)     | 100 (100–100) |
| Spondylitis         | 1995 | 0 (0–0)       | 0 (0–0)       | 0 (0–0)       | 0.1 (0.1–0.1) | 52.3 (46.9–57.7) | 18.5 (14.2–22.7) | 29.2 (24.3–34.2) | 100 (100–100) |
| Spondylitis         | 2010 | 0 (0–0)       | 0 (0–0)       | 0.2 (0.2–0.2) | 0.2 (0.2–0.2) | 6.3 (4.9–7.7)    | 8.1 (6.5–9.7)    | 85.6 (83.5–87.7) | 100 (100–100) |
| Spondylitis         | 2018 | 0 (0–0)       | 0 (0–0)       | 0.4 (0.4–0.4) | 0.4 (0.4–0.4) | 2.8 (2.1–3.5)    | 4.1 (3.2–4.9)    | 93.1 (92–94.3)   | 100 (100–100) |
| <b>Urogenital</b>   |      |               |               |               |               |                  |                  |                  |               |
| All                 | 1995 | 0.4 (0.4–0.4) | 0.1 (0.1–0.1) | 0.2 (0.2–0.2) | 0.7 (0.7–0.7) | 57.4 (55.7–59.1) | 13.5 (12.3–14.7) | 29.1 (27.6–30.7) | 100 (100–100) |
| All                 | 2010 | 0.2 (0.2–0.2) | 0.1 (0.1–0.1) | 1.6 (1.6–1.6) | 1.8 (1.8–1.8) | 10.7 (10–11.3)   | 3.5 (3.1–3.8)    | 85.9 (85.2–86.6) | 100 (100–100) |
| All                 | 2018 | 0.2 (0.2–0.2) | 0.1 (0.1–0.1) | 2.8 (2.8–2.8) | 3.1 (3.1–3.1) | 6.9 (6.5–7.3)    | 2.2 (1.9–2.4)    | 91 (90.5–91.4)   | 100 (100–100) |
| Pyelonephritis      | 1995 | 0.2 (0.2–0.2) | 0 (0–0)       | 0.1 (0.1–0.1) | 0.2 (0.2–0.2) | 71.7 (69.1–74.3) | 2.6 (1.7–3.5)    | 25.7 (23.1–28.2) | 100 (100–100) |
| Pyelonephritis      | 2010 | 0.1 (0.1–0.1) | 0 (0–0)       | 0.5 (0.5–0.5) | 0.6 (0.6–0.6) | 17 (15.7–18.3)   | 1.4 (1–1.8)      | 81.6 (80.3–82.9) | 100 (100–100) |
| Pyelonephritis      | 2018 | 0.1 (0.1–0.2) | 0 (0–0)       | 0.9 (0.9–0.9) | 1 (1–1)       | 13.5 (12.6–14.5) | 1.4 (1.1–1.8)    | 85 (84–86)       | 100 (100–100) |
| Renal disease       | 1995 | 0.2 (0.2–0.2) | 0.1 (0.1–0.1) | 0.1 (0.1–0.2) | 0.4 (0.4–0.4) | 50.7 (48.6–52.7) | 17.4 (15.8–19)   | 31.9 (30–33.9)   | 100 (100–100) |
| Renal disease       | 2010 | 0.1 (0.1–0.1) | 0.1 (0–0.1)   | 1.1 (1.1–1.2) | 1.3 (1.3–1.3) | 7.7 (7–8.3)      | 4 (3.5–4.5)      | 88.3 (87.5–89.1) | 100 (100–100) |
| Renal disease       | 2018 | 0.1 (0.1–0.1) | 0 (0–0.1)     | 2 (2–2.1)     | 2.2 (2.2–2.2) | 3.8 (3.4–4.1)    | 2.1 (1.8–2.4)    | 94.1 (93.7–94.6) | 100 (100–100) |

#### Abbreviations

AMI, Acute myocardial infarction; CI, Confidence interval; CPD, Chronic pulmonary disease; IBD, Inflammatory bowel disease; ICD, International Classification of Diseases; PAD, Peripheral artery disease

**Table S3. Age group**

Proportion of persons with records of diagnoses identified by ICD-8, ICD-10, or both. For age groups by diseases and sample year.

| Disease               | Age group | Year | Proportion of sample,% |                      |                    |                   | Proportion of diseased,% |                      |                    |                   |
|-----------------------|-----------|------|------------------------|----------------------|--------------------|-------------------|--------------------------|----------------------|--------------------|-------------------|
|                       |           |      | ICD-8<br>(95% CI)      | ICD-8+10<br>(95% CI) | ICD-10<br>(95% CI) | Total<br>(95% CI) | ICD-8<br>(95% CI)        | ICD-8+10<br>(95% CI) | ICD-10<br>(95% CI) | Total<br>(95% CI) |
| <b>Cardiovascular</b> |           |      |                        |                      |                    |                   |                          |                      |                    |                   |
| All                   | 40–54     | 1995 | 1.6 (1.6–1.7)          | 0.4 (0.4–0.4)        | 0.9 (0.9–0.9)      | 2.9 (2.8–3)       | 56.1 (54.9–57.3)         | 13.6 (12.8–14.4)     | 30.3 (29.2–31.4)   | 100 (100–100)     |
| All                   | 40–54     | 2010 | 0.2 (0.2–0.2)          | 0.2 (0.2–0.2)        | 6.5 (6.4–6.6)      | 6.8 (6.7–6.9)     | 2.6 (2.4–2.9)            | 2.5 (2.3–2.8)        | 94.8 (94.5–95.2)   | 100 (100–100)     |
| All                   | 40–54     | 2018 | 0.1 (0.1–0.1)          | 0.1 (0.1–0.1)        | 8.1 (7.9–8.2)      | 8.2 (8.1–8.3)     | 0.8 (0.7–1)              | 0.8 (0.6–0.9)        | 98.4 (98.2–98.6)   | 100 (100–100)     |
| All                   | 55–69     | 1995 | 5.9 (5.8–6)            | 1.5 (1.4–1.6)        | 2.1 (2.1–2.2)      | 9.6 (9.5–9.7)     | 61.9 (61.1–62.7)         | 15.7 (15.2–16.3)     | 22.3 (21.7–23)     | 100 (100–100)     |
| All                   | 55–69     | 2010 | 0.6 (0.5–0.6)          | 1.1 (1–1.1)          | 18.8 (18.7–19)     | 20.5 (20.3–20.7)  | 2.7 (2.5–2.9)            | 5.3 (5.1–5.5)        | 92 (91.7–92.3)     | 100 (100–100)     |
| All                   | 55–69     | 2018 | 0.2 (0.2–0.2)          | 0.4 (0.4–0.5)        | 23.7 (23.5–23.9)   | 24.4 (24.2–24.6)  | 0.9 (0.8–1)              | 1.8 (1.7–2)          | 97.3 (97.1–97.4)   | 100 (100–100)     |
| All                   | 70–84     | 1995 | 10.9 (10.7–11.1)       | 2.9 (2.8–3.1)        | 3.8 (3.6–3.9)      | 17.7 (17.5–17.9)  | 62 (61.2–62.7)           | 16.7 (16.1–17.3)     | 21.3 (20.7–22)     | 100 (100–100)     |
| All                   | 70–84     | 2010 | 1.1 (1.1–1.2)          | 3.3 (3.2–3.4)        | 35 (34.7–35.3)     | 39.4 (39.1–39.7)  | 2.8 (2.7–3)              | 8.4 (8.1–8.7)        | 88.8 (88.4–89.1)   | 100 (100–100)     |
| All                   | 70–84     | 2018 | 0.4 (0.3–0.4)          | 1.7 (1.6–1.8)        | 43.5 (43.2–43.8)   | 45.6 (45.3–45.9)  | 0.8 (0.7–0.9)            | 3.8 (3.6–3.9)        | 95.4 (95.2–95.6)   | 100 (100–100)     |
| All                   | +85       | 1995 | 15.1 (14.6–15.7)       | 2.9 (2.7–3.2)        | 4.6 (4.3–4.9)      | 22.6 (22–23.2)    | 66.8 (65.2–68.3)         | 12.9 (11.8–14)       | 20.3 (19–21.6)     | 100 (100–100)     |
| All                   | +85       | 2010 | 1.3 (1.2–1.5)          | 3.9 (3.6–4.1)        | 45 (44.3–45.7)     | 50.2 (49.5–50.9)  | 2.7 (2.3–3)              | 7.7 (7.1–8.2)        | 89.7 (89–90.3)     | 100 (100–100)     |
| All                   | +85       | 2018 | 0.4 (0.3–0.5)          | 2.7 (2.5–3)          | 60.4 (59.7–61.1)   | 63.6 (62.9–64.3)  | 0.7 (0.5–0.8)            | 4.3 (4–4.7)          | 95 (94.6–95.4)     | 100 (100–100)     |
| AMI                   | 40–54     | 1995 | 0.5 (0.4–0.5)          | 0 (0–0.1)            | 0.2 (0.2–0.2)      | 0.7 (0.7–0.7)     | 66.7 (64.4–69)           | 7.1 (5.8–8.3)        | 26.2 (24.1–28.4)   | 100 (100–100)     |
| AMI                   | 40–54     | 2010 | 0 (0–0)                | 0 (0–0)              | 0.8 (0.8–0.9)      | 0.9 (0.9–0.9)     | 1.6 (1–2.2)              | 1.3 (0.8–1.9)        | 97.1 (96.3–97.8)   | 100 (100–100)     |
| AMI                   | 40–54     | 2018 | 0 (0–0)                | 0 (0–0)              | 0.9 (0.9–1)        | 0.9 (0.9–0.9)     | 0.3 (0–0.5)              | 0 (0–0)              | 99.7 (99.5–100)    | 100 (100–100)     |
| AMI                   | 55–69     | 1995 | 2.6 (2.5–2.7)          | 0.2 (0.2–0.2)        | 0.6 (0.5–0.6)      | 3.4 (3.3–3.5)     | 77.3 (76.2–78.4)         | 6.2 (5.5–6.8)        | 16.5 (15.5–17.6)   | 100 (100–100)     |
| AMI                   | 55–69     | 2010 | 0.2 (0.2–0.3)          | 0.1 (0.1–0.1)        | 3 (2.9–3)          | 3.3 (3.2–3.4)     | 7.4 (6.7–8)              | 3.7 (3.2–4.2)        | 88.9 (88.1–89.7)   | 100 (100–100)     |
| AMI                   | 55–69     | 2018 | 0.1 (0–0.1)            | 0 (0–0)              | 3.1 (3.1–3.2)      | 3.2 (3.1–3.3)     | 1.7 (1.4–2.1)            | 0.8 (0.6–1)          | 97.5 (97.1–97.9)   | 100 (100–100)     |
| AMI                   | 70–84     | 1995 | 4.6 (4.5–4.7)          | 0.3 (0.3–0.3)        | 0.9 (0.9–1)        | 5.8 (5.7–5.9)     | 78.8 (77.8–79.9)         | 5.2 (4.6–5.8)        | 15.9 (15–16.9)     | 100 (100–100)     |
| AMI                   | 70–84     | 2010 | 1.2 (1.1–1.3)          | 0.5 (0.4–0.5)        | 6.1 (6–6.3)        | 7.8 (7.6–8)       | 15.2 (14.4–16.1)         | 6.3 (5.7–6.9)        | 78.5 (77.5–79.5)   | 100 (100–100)     |
| AMI                   | 70–84     | 2018 | 0.4 (0.3–0.4)          | 0.2 (0.2–0.2)        | 6 (5.9–6.2)        | 6.6 (6.5–6.7)     | 5.6 (5.1–6.2)            | 3 (2.6–3.3)          | 91.4 (90.8–92)     | 100 (100–100)     |
| AMI                   | +85       | 1995 | 4.2 (3.9–4.5)          | 0.2 (0.1–0.3)        | 0.7 (0.6–0.8)      | 5.1 (4.8–5.4)     | 82.2 (79.6–84.8)         | 3.7 (2.4–5)          | 14.1 (11.7–16.5)   | 100 (100–100)     |
| AMI                   | +85       | 2010 | 1.4 (1.2–1.6)          | 0.5 (0.4–0.6)        | 7.3 (6.9–7.7)      | 9.2 (8.8–9.6)     | 15.4 (13.7–17.1)         | 5.4 (4.3–6.5)        | 79.2 (77.2–81.1)   | 100 (100–100)     |
| AMI                   | +85       | 2018 | 0.7 (0.6–0.8)          | 0.5 (0.4–0.6)        | 8.8 (8.3–9.1)      | 9.8 (9.4–10.2)    | 6.8 (5.7–8)              | 4.7 (3.7–5.6)        | 88.5 (87–90)       | 100 (100–100)     |
| Atrial fibrillation   | 40–54     | 1995 | 0.1 (0.1–0.2)          | 0 (0–0.1)            | 0.1 (0.1–0.1)      | 0.3 (0.3–0.3)     | 49.6 (45.8–53.5)         | 17.8 (14.9–20.8)     | 32.6 (28.9–36.2)   | 100 (100–100)     |
| Atrial fibrillation   | 40–54     | 2010 | 0 (0–0)                | 0 (0–0)              | 0.7 (0.7–0.7)      | 0.7 (0.7–0.7)     | 1.9 (1.2–2.6)            | 2.6 (1.8–3.4)        | 95.5 (94.5–96.5)   | 100 (100–100)     |
| Atrial fibrillation   | 40–54     | 2018 | 0 (0–0)                | 0 (0–0)              | 0.9 (0.9–1)        | 1 (1–1)           | 0.8 (0.4–1.2)            | 1 (0.6–1.5)          | 98.2 (97.6–98.8)   | 100 (100–100)     |
| Atrial fibrillation   | 55–69     | 1995 | 0.7 (0.7–0.7)          | 0.2 (0.2–0.2)        | 0.4 (0.4–0.4)      | 1.3 (1.2–1.4)     | 52.7 (50.5–54.9)         | 16.1 (14.5–17.7)     | 31.2 (29.2–33.2)   | 100 (100–100)     |
| Atrial fibrillation   | 55–69     | 2010 | 0 (0–0.1)              | 0.1 (0.1–0.1)        | 3.2 (3.1–3.2)      | 3.3 (3.2–3.4)     | 1.4 (1.1–1.7)            | 3.2 (2.7–3.6)        | 95.4 (94.9–96)     | 100 (100–100)     |
| Atrial fibrillation   | 55–69     | 2018 | 0 (0–0)                | 0 (0–0.1)            | 4 (3.9–4.1)        | 4 (3.9–4.1)       | 0.6 (0.4–0.8)            | 1 (0.8–1.2)          | 98.4 (98.1–98.7)   | 100 (100–100)     |
| Atrial fibrillation   | 70–84     | 1995 | 2.4 (2.3–2.5)          | 0.6 (0.5–0.6)        | 1.3 (1.2–1.3)      | 4.3 (4.2–4.4)     | 56.7 (55.2–58.3)         | 13.5 (12.4–14.5)     | 29.8 (28.4–31.2)   | 100 (100–100)     |
| Atrial fibrillation   | 70–84     | 2010 | 0.2 (0.1–0.2)          | 0.4 (0.3–0.4)        | 9.6 (9.4–9.8)      | 10.2 (10–10.4)    | 1.5 (1.2–1.7)            | 3.8 (3.4–4.2)        | 94.8 (94.3–95.2)   | 100 (100–100)     |
| Atrial fibrillation   | 70–84     | 2018 | 0 (0–0.1)              | 0.2 (0.1–0.2)        | 12.1 (11.9–12.3)   | 12.3 (12.1–12.5)  | 0.4 (0.3–0.5)            | 1.4 (1.2–1.6)        | 98.2 (98–98.4)     | 100 (100–100)     |
| Atrial fibrillation   | +85       | 1995 | 4.4 (4.1–4.8)          | 0.8 (0.6–0.9)        | 2 (1.7–2.2)        | 7.2 (6.8–7.6)     | 61.9 (59.1–64.7)         | 10.8 (9–12.6)        | 27.3 (24.7–29.8)   | 100 (100–100)     |
| Atrial fibrillation   | +85       | 2010 | 0.2 (0.1–0.3)          | 0.7 (0.6–0.8)        | 16.5 (15.9–17)     | 17.4 (16.8–18)    | 1.1 (0.8–1.5)            | 4.2 (3.5–4.9)        | 94.7 (93.9–95.5)   | 100 (100–100)     |
| Atrial fibrillation   | +85       | 2018 | 0.1 (0–0.1)            | 0.4 (0.3–0.5)        | 22.9 (22.3–23.5)   | 23.3 (22.7–23.9)  | 0.2 (0.1–0.4)            | 1.7 (1.3–2.1)        | 98 (97.6–98.4)     | 100 (100–100)     |
| Dyslipidemia          | 40–54     | 1995 | 0.2 (0.1–0.2)          | 0 (0–0)              | 0.2 (0.2–0.2)      | 0.4 (0.4–0.4)     | 41.5 (38.2–44.7)         | 10.8 (8.7–12.8)      | 47.7 (44.4–51)     | 100 (100–100)     |

|               |       |      |               |               |                  |                  |                  |                  |                  |                  |               |
|---------------|-------|------|---------------|---------------|------------------|------------------|------------------|------------------|------------------|------------------|---------------|
| Dyslipidemia  | 40–54 | 2010 | 0 (0–0)       | 0 (0–0)       | 1.7 (1.7–1.8)    | 1.7 (1.6–1.8)    | 0.7 (0.4–0.9)    | 0.8 (0.5–1.1)    | 98.5 (98.1–98.9) | 100 (100–100)    |               |
| Dyslipidemia  | 40–54 | 2018 | 0 (0–0)       | 0 (0–0)       | 2.1 (2.1–2.2)    | 2.1 (2–2.2)      | 0.2 (0.1–0.4)    | 0.2 (0.1–0.4)    | 99.5 (99.3–99.7) | 100 (100–100)    |               |
| Dyslipidemia  | 55–69 | 1995 | 0.4 (0.3–0.4) | 0.1 (0–0.1)   | 0.3 (0.2–0.3)    | 0.7 (0.7–0.7)    | 53.1 (50.1–56.1) | 7.6 (6–9.2)      | 39.3 (36.4–42.3) | 100 (100–100)    |               |
| Dyslipidemia  | 55–69 | 2010 | 0.1 (0.1–0.1) | 0.1 (0.1–0.1) | 5.8 (5.7–5.9)    | 6 (5.9–6.1)      | 1.1 (0.9–1.2)    | 1.6 (1.3–1.8)    | 97.4 (97.1–97.7) | 100 (100–100)    |               |
| Dyslipidemia  | 55–69 | 2018 | 0 (0–0)       | 0 (0–0.1)     | 7.4 (7.3–7.5)    | 7.5 (7.4–7.6)    | 0.3 (0.2–0.4)    | 0.7 (0.5–0.8)    | 99.1 (98.9–99.2) | 100 (100–100)    |               |
| Dyslipidemia  | 70–84 | 1995 | 0.2 (0.1–0.2) | 0 (0–0)       | 0 (0–0.1)        | 0.1 (0–0.1)      | 0.2 (0.2–0.2)    | 69.8 (63.6–75.9) | 4.7 (1.8–7.5)    | 25.6 (19.7–31.4) | 100 (100–100) |
| Dyslipidemia  | 70–84 | 2010 | 0.2 (0.1–0.2) | 0.2 (0.1–0.2) | 9.5 (9.3–9.7)    | 9.8 (9.6–10)     | 1.5 (1.3–1.8)    | 1.6 (1.3–1.9)    | 96.9 (96.5–97.2) | 100 (100–100)    |               |
| Dyslipidemia  | 70–84 | 2018 | 0.1 (0.1–0.1) | 0.1 (0.1–0.1) | 14 (13.8–14.2)   | 14.2 (14–14.4)   | 0.6 (0.5–0.7)    | 0.8 (0.6–0.9)    | 98.7 (98.5–98.8) | 100 (100–100)    |               |
| Dyslipidemia  | +85   | 1995 | 0 (0–0.1)     | 0 (0–0)       | 0 (0–0)          | 0 (0–0)          | 100 (100–100)    | 0 (0–0)          | 0 (0–0)          | 100 (100–100)    |               |
| Dyslipidemia  | +85   | 2010 | 0.1 (0–0.1)   | 0.1 (0–0.1)   | 6 (5.7–6.4)      | 6.2 (5.8–6.6)    | 1.4 (0.7–2)      | 0.9 (0.3–1.5)    | 97.7 (96.9–98.6) | 100 (100–100)    |               |
| Dyslipidemia  | +85   | 2018 | 0.1 (0.1–0.1) | 0.1 (0.1–0.2) | 14.7 (14.2–15.2) | 14.9 (14.4–15.4) | 0.4 (0.1–0.6)    | 0.7 (0.4–1)      | 98.9 (98.5–99.3) | 100 (100–100)    |               |
| Heart failure | 40–54 | 1995 | 0.1 (0.1–0.1) | 0 (0–0)       | 0.1 (0.1–0.1)    | 0.2 (0.2–0.2)    | 44 (39.4–48.5)   | 12.1 (9.1–15.1)  | 44 (39.4–48.5)   | 100 (100–100)    |               |
| Heart failure | 40–54 | 2010 | 0 (0–0)       | 0 (0–0)       | 0.4 (0.4–0.5)    | 0.5 (0.5–0.5)    | 4.1 (2.9–5.4)    | 0.5 (0.1–1)      | 95.4 (94–96.7)   | 100 (100–100)    |               |
| Heart failure | 40–54 | 2018 | 0 (0–0)       | 0 (0–0)       | 0.6 (0.5–0.6)    | 0.6 (0.6–0.6)    | 1.8 (1–2.5)      | 0 (0–0)          | 98.2 (97.5–99)   | 100 (100–100)    |               |
| Heart failure | 55–69 | 1995 | 0.7 (0.6–0.7) | 0.2 (0.1–0.2) | 0.5 (0.4–0.5)    | 1.3 (1.2–1.4)    | 50.8 (48.6–53)   | 12.6 (11.2–14.1) | 36.6 (34.5–38.7) | 100 (100–100)    |               |
| Heart failure | 55–69 | 2010 | 0 (0–0)       | 0 (0–0)       | 1.9 (1.8–1.9)    | 1.9 (1.8–2)      | 1.9 (1.4–2.3)    | 1.1 (0.8–1.5)    | 97 (96.4–97.6)   | 100 (100–100)    |               |
| Heart failure | 55–69 | 2018 | 0 (0–0)       | 0 (0–0)       | 2.1 (2.1–2.2)    | 2.2 (2.1–2.3)    | 0.7 (0.4–0.9)    | 0.1 (0–0.3)      | 99.2 (98.9–99.5) | 100 (100–100)    |               |
| Heart failure | 70–84 | 1995 | 2.4 (2.3–2.5) | 0.6 (0.5–0.6) | 1.6 (1.5–1.7)    | 4.6 (4.5–4.7)    | 52.9 (51.4–54.3) | 12.1 (11.2–13.1) | 35 (33.6–36.4)   | 100 (100–100)    |               |
| Heart failure | 70–84 | 2010 | 0.1 (0.1–0.2) | 0.1 (0.1–0.1) | 6.1 (5.9–6.2)    | 6.3 (6.1–6.5)    | 2 (1.7–2.4)      | 1.6 (1.2–1.9)    | 96.4 (95.9–96.9) | 100 (100–100)    |               |
| Heart failure | 70–84 | 2018 | 0 (0–0.1)     | 0 (0–0)       | 5.6 (5.4–5.7)    | 5.6 (5.5–5.7)    | 0.8 (0.6–1)      | 0.4 (0.2–0.6)    | 98.8 (98.5–99.1) | 100 (100–100)    |               |
| Heart failure | +85   | 1995 | 6 (5.7–6.4)   | 1 (0.8–1.1)   | 2.6 (2.4–2.9)    | 9.6 (9.1–10.1)   | 62.8 (60.4–65.2) | 10 (8.5–11.5)    | 27.2 (25–29.4)   | 100 (100–100)    |               |
| Heart failure | +85   | 2010 | 0.3 (0.2–0.4) | 0.2 (0.1–0.3) | 11.2 (10.8–11.7) | 11.7 (11.2–12.2) | 2.6 (1.9–3.3)    | 1.7 (1.1–2.2)    | 95.7 (94.8–96.6) | 100 (100–100)    |               |
| Heart failure | +85   | 2018 | 0.1 (0.1–0.1) | 0.1 (0–0.1)   | 10.6 (10.2–11.1) | 10.8 (10.4–11.2) | 0.5 (0.2–0.8)    | 0.8 (0.4–1.1)    | 98.8 (98.3–99.2) | 100 (100–100)    |               |
| Hypertension  | 40–54 | 1995 | 0.9 (0.8–0.9) | 0.1 (0.1–0.2) | 0.5 (0.4–0.5)    | 1.5 (1.5–1.5)    | 58.8 (57.1–60.4) | 10 (9–11)        | 31.2 (29.7–32.8) | 100 (100–100)    |               |
| Hypertension  | 40–54 | 2010 | 0.1 (0.1–0.1) | 0.1 (0.1–0.1) | 4 (3.9–4)        | 4.2 (4.1–4.3)    | 2.4 (2.1–2.7)    | 2.1 (1.8–2.4)    | 95.4 (95–95.9)   | 100 (100–100)    |               |
| Hypertension  | 40–54 | 2018 | 0 (0–0)       | 0 (0–0)       | 4.9 (4.8–5)      | 5 (4.9–5.1)      | 0.6 (0.5–0.8)    | 0.6 (0.5–0.8)    | 98.8 (98.6–99)   | 100 (100–100)    |               |
| Hypertension  | 55–69 | 1995 | 2.3 (2.3–2.4) | 0.3 (0.3–0.4) | 0.8 (0.8–0.9)    | 3.5 (3.4–3.6)    | 66.2 (65–67.5)   | 9.8 (9–10.6)     | 24 (22.8–25.1)   | 100 (100–100)    |               |
| Hypertension  | 55–69 | 2010 | 0.3 (0.3–0.3) | 0.5 (0.5–0.5) | 12.4 (12.3–12.6) | 13.3 (13.1–13.5) | 2.4 (2.2–2.6)    | 3.8 (3.5–4)      | 93.8 (93.5–94.1) | 100 (100–100)    |               |
| Hypertension  | 55–69 | 2018 | 0.1 (0.1–0.1) | 0.2 (0.2–0.3) | 16.3 (16.1–16.5) | 16.7 (16.5–16.9) | 0.7 (0.6–0.8)    | 1.4 (1.2–1.5)    | 97.9 (97.8–98.1) | 100 (100–100)    |               |
| Hypertension  | 70–84 | 1995 | 4 (3.8–4.1)   | 0.5 (0.4–0.5) | 1.1 (1.1–1.2)    | 5.5 (5.4–5.6)    | 71.7 (70.4–72.9) | 8.1 (7.4–8.9)    | 20.2 (19.1–21.3) | 100 (100–100)    |               |
| Hypertension  | 70–84 | 2010 | 0.5 (0.5–0.6) | 1.2 (1.1–1.2) | 23.8 (23.6–24.1) | 25.5 (25.2–25.8) | 2.1 (1.9–2.3)    | 4.6 (4.3–4.9)    | 93.3 (93–93.7)   | 100 (100–100)    |               |
| Hypertension  | 70–84 | 2018 | 0.2 (0.2–0.3) | 0.8 (0.7–0.8) | 31.9 (31.6–32.1) | 32.9 (32.6–33.2) | 0.7 (0.6–0.8)    | 2.3 (2.2–2.5)    | 97 (96.8–97.2)   | 100 (100–100)    |               |
| Hypertension  | +85   | 1995 | 4.3 (4–4.6)   | 0.3 (0.2–0.4) | 0.9 (0.8–1.1)    | 5.5 (5.1–5.9)    | 78 (75.2–80.7)   | 5.1 (3.6–6.5)    | 16.9 (14.5–19.4) | 100 (100–100)    |               |
| Hypertension  | +85   | 2010 | 0.7 (0.6–0.8) | 1.2 (1.1–1.4) | 30.2 (29.6–30.9) | 32.2 (31.5–32.9) | 2.2 (1.8–2.5)    | 3.8 (3.3–4.3)    | 94 (93.4–94.6)   | 100 (100–100)    |               |
| Hypertension  | +85   | 2018 | 0.2 (0.2–0.3) | 1.1 (1–1.3)   | 46.1 (45.4–46.8) | 47.5 (46.8–48.2) | 0.5 (0.4–0.7)    | 2.3 (2–2.6)      | 97.2 (96.8–97.5) | 100 (100–100)    |               |
| PAD           | 40–54 | 1995 | 0.3 (0.3–0.3) | 0.1 (0–0.1)   | 0.1 (0.1–0.1)    | 0.5 (0.5–0.5)    | 60.1 (57.2–63)   | 11.9 (10–13.9)   | 28 (25.3–30.6)   | 100 (100–100)    |               |
| PAD           | 40–54 | 2010 | 0.1 (0.1–0.1) | 0 (0–0)       | 0.7 (0.7–0.8)    | 0.8 (0.8–0.8)    | 8.1 (6.8–9.4)    | 1.5 (0.9–2)      | 90.4 (89–91.8)   | 100 (100–100)    |               |
| PAD           | 40–54 | 2018 | 0 (0–0)       | 0 (0–0)       | 0.9 (0.9–1)      | 0.9 (0.9–0.9)    | 2.9 (2.2–3.7)    | 0.5 (0.2–0.9)    | 96.6 (95.7–97.4) | 100 (100–100)    |               |
| PAD           | 55–69 | 1995 | 1.1 (1.1–1.2) | 0.3 (0.3–0.3) | 0.5 (0.5–0.6)    | 2 (1.9–2.1)      | 57.3 (55.5–59)   | 15.4 (14.1–16.7) | 27.4 (25.8–29)   | 100 (100–100)    |               |
| PAD           | 55–69 | 2010 | 0.2 (0.1–0.2) | 0.1 (0.1–0.1) | 2.6 (2.6–2.7)    | 2.9 (2.8–3)      | 5.4 (4.8–6.1)    | 3.1 (2.6–3.5)    | 91.5 (90.7–92.2) | 100 (100–100)    |               |
| PAD           | 55–69 | 2018 | 0.1 (0.1–0.1) | 0 (0–0)       | 3 (3–3.1)        | 3.2 (3.1–3.3)    | 2.9 (2.4–3.3)    | 0.8 (0.6–1.1)    | 96.3 (95.8–96.8) | 100 (100–100)    |               |
| PAD           | 70–84 | 1995 | 1.8 (1.8–1.9) | 0.5 (0.5–0.6) | 0.9 (0.9–1)      | 3.3 (3.2–3.4)    | 56.1 (54.4–57.9) | 15.4 (14.2–16.7) | 28.5 (26.9–30)   | 100 (100–100)    |               |
| PAD           | 70–84 | 2010 | 0.3 (0.2–0.3) | 0.3 (0.3–0.4) | 6.4 (6.3–6.6)    | 7 (6.8–7.2)      | 3.9 (3.5–4.4)    | 4.6 (4.1–5.1)    | 91.4 (90.7–92.2) | 100 (100–100)    |               |
| PAD           | 70–84 | 2018 | 0.1 (0.1–0.2) | 0.1 (0.1–0.2) | 7.3 (7.1–7.4)    | 7.6 (7.4–7.8)    | 1.9 (1.6–2.2)    | 1.7 (1.5–2)      | 96.3 (95.9–96.7) | 100 (100–100)    |               |
| PAD           | +85   | 1995 | 2.2 (2–2.4)   | 0.2 (0.1–0.2) | 0.9 (0.7–1)      | 3.2 (2.9–3.5)    | 68 (63.9–72)     | 4.9 (3–6.7)      | 27.2 (23.3–31)   | 100 (100–100)    |               |
| PAD           | +85   | 2010 | 0.3 (0.2–0.3) | 0.3 (0.2–0.4) | 6.8 (6.4–7.1)    | 7.3 (6.9–7.7)    | 3.4 (2.5–4.4)    | 3.8 (2.8–4.9)    | 92.7 (91.3–94.1) | 100 (100–100)    |               |

|                   |       |      |                  |               |                  |                  |                  |                  |                  |               |
|-------------------|-------|------|------------------|---------------|------------------|------------------|------------------|------------------|------------------|---------------|
| PAD               | +85   | 2018 | 0.1 (0.1–0.2)    | 0.2 (0.1–0.2) | 9.1 (8.7–9.6)    | 9.4 (9–9.8)      | 1.4 (0.9–2)      | 1.7 (1.1–2.3)    | 96.9 (96–97.7)   | 100 (100–100) |
| <b>Endocrine</b>  |       |      |                  |               |                  |                  |                  |                  |                  |               |
| Diabetes mellitus | 40–54 | 1995 | 0.7 (0.7–0.8)    | 0.2 (0.2–0.2) | 0.2 (0.2–0.2)    | 1.2 (1.2–1.2)    | 62.9 (61.1–64.7) | 19.2 (17.7–20.7) | 17.9 (16.5–19.4) | 100 (100–100) |
| Diabetes mellitus | 40–54 | 2010 | 0.2 (0.1–0.2)    | 0.3 (0.3–0.3) | 1.8 (1.7–1.8)    | 2.2 (2.1–2.3)    | 6.8 (6.1–7.5)    | 14.4 (13.4–15.4) | 78.8 (77.6–80)   | 100 (100–100) |
| Diabetes mellitus | 40–54 | 2018 | 0.1 (0–0.1)      | 0.3 (0.2–0.3) | 2.3 (2.2–2.4)    | 2.6 (2.5–2.7)    | 2.1 (1.7–2.5)    | 10.3 (9.5–11.1)  | 87.6 (86.7–88.5) | 100 (100–100) |
| Diabetes mellitus | 55–69 | 1995 | 1.4 (1.3–1.4)    | 0.6 (0.5–0.6) | 0.5 (0.5–0.5)    | 2.5 (2.4–2.6)    | 56 (54.4–57.6)   | 23.8 (22.4–25.1) | 20.3 (19–21.6)   | 100 (100–100) |
| Diabetes mellitus | 55–69 | 2010 | 0.2 (0.2–0.2)    | 0.5 (0.5–0.6) | 4.7 (4.6–4.8)    | 5.4 (5.3–5.5)    | 3.4 (3–3.7)      | 9.9 (9.4–10.5)   | 86.7 (86–87.4)   | 100 (100–100) |
| Diabetes mellitus | 55–69 | 2018 | 0.1 (0.1–0.2)    | 0.4 (0.4–0.4) | 5.6 (5.5–5.7)    | 6.2 (6.1–6.3)    | 2.4 (2.1–2.6)    | 6.7 (6.2–7.2)    | 91 (90.4–91.5)   | 100 (100–100) |
| Diabetes mellitus | 70–84 | 1995 | 2.2 (2.1–2.3)    | 0.9 (0.8–0.9) | 0.8 (0.7–0.8)    | 3.9 (3.8–4)      | 57.7 (56.1–59.3) | 22.6 (21.2–23.9) | 19.8 (18.5–21)   | 100 (100–100) |
| Diabetes mellitus | 70–84 | 2010 | 0.1 (0.1–0.2)    | 0.8 (0.7–0.9) | 7.3 (7.1–7.5)    | 8.2 (8–8.4)      | 1.7 (1.4–2)      | 9.7 (9–10.4)     | 88.6 (87.9–89.4) | 100 (100–100) |
| Diabetes mellitus | 70–84 | 2018 | 0.1 (0.1–0.1)    | 0.5 (0.4–0.5) | 9.3 (9.1–9.5)    | 9.9 (9.7–10.1)   | 0.9 (0.7–1.1)    | 4.7 (4.3–5.1)    | 94.4 (94–94.9)   | 100 (100–100) |
| Diabetes mellitus | +85   | 1995 | 2.9 (2.6–3.1)    | 0.7 (0.6–0.9) | 0.6 (0.5–0.7)    | 4.2 (3.9–4.5)    | 68.4 (64.9–71.9) | 17.6 (14.8–20.5) | 14 (11.4–16.6)   | 100 (100–100) |
| Diabetes mellitus | +85   | 2010 | 0.1 (0.1–0.2)    | 0.7 (0.6–0.8) | 6.3 (5.9–6.7)    | 7.1 (6.7–7.5)    | 1.6 (0.9–2.3)    | 9.8 (8.2–11.4)   | 88.6 (86.9–90.4) | 100 (100–100) |
| Diabetes mellitus | +85   | 2018 | 0.1 (0–0.1)      | 0.5 (0.4–0.6) | 9.1 (8.7–9.5)    | 9.6 (9.2–10)     | 0.6 (0.2–0.9)    | 5 (4–6.1)        | 94.4 (93.3–95.5) | 100 (100–100) |
| <b>Fractures</b>  |       |      |                  |               |                  |                  |                  |                  |                  |               |
| All               | 40–54 | 1995 | 2 (1.9–2)        | 0.1 (0.1–0.1) | 0.9 (0.8–0.9)    | 3 (2.9–3.1)      | 66.6 (65.5–67.7) | 4.3 (3.8–4.7)    | 29.1 (28–30.2)   | 100 (100–100) |
| All               | 40–54 | 2010 | 2.4 (2.3–2.5)    | 0.6 (0.6–0.6) | 9.2 (9.1–9.3)    | 12.2 (12.1–12.3) | 19.7 (19.2–20.2) | 4.9 (4.7–5.2)    | 75.4 (74.8–75.9) | 100 (100–100) |
| All               | 40–54 | 2018 | 2.9 (2.8–3)      | 0.9 (0.9–1)   | 13.4 (13.3–13.6) | 17.3 (17.1–17.5) | 16.7 (16.3–17.1) | 5.5 (5.2–5.7)    | 77.8 (77.4–78.2) | 100 (100–100) |
| All               | 55–69 | 1995 | 2.9 (2.8–3)      | 0.3 (0.2–0.3) | 1.5 (1.4–1.6)    | 4.7 (4.6–4.8)    | 62.5 (61.4–63.6) | 5.7 (5.2–6.2)    | 31.8 (30.7–32.9) | 100 (100–100) |
| All               | 55–69 | 2010 | 1.4 (1.4–1.5)    | 0.5 (0.5–0.5) | 11.7 (11.6–11.9) | 13.6 (13.4–13.8) | 10.4 (10.1–10.8) | 3.6 (3.4–3.8)    | 86 (85.5–86.4)   | 100 (100–100) |
| All               | 55–69 | 2018 | 1.5 (1.5–1.6)    | 0.6 (0.6–0.6) | 16.1 (15.9–16.2) | 18.2 (18–18.4)   | 8.5 (8.2–8.8)    | 3.3 (3.1–3.5)    | 88.2 (87.9–88.6) | 100 (100–100) |
| All               | 70–84 | 1995 | 6.9 (6.8–7.1)    | 1 (1–1.1)     | 3 (2.9–3.1)      | 11 (10.8–11.2)   | 63.1 (62.2–64)   | 9.2 (8.7–9.8)    | 27.6 (26.8–28.5) | 100 (100–100) |
| All               | 70–84 | 2010 | 1.7 (1.6–1.8)    | 0.9 (0.8–1)   | 17.9 (17.7–18.2) | 20.5 (20.2–20.8) | 8.2 (7.8–8.6)    | 4.4 (4.1–4.7)    | 87.4 (86.9–87.9) | 100 (100–100) |
| All               | 70–84 | 2018 | 1.2 (1.1–1.3)    | 0.6 (0.5–0.6) | 21.5 (21.3–21.8) | 23.3 (23.1–23.5) | 5.1 (4.9–5.4)    | 2.6 (2.4–2.7)    | 92.3 (92–92.7)   | 100 (100–100) |
| All               | +85   | 1995 | 15.9 (15.4–16.5) | 3.1 (2.9–3.4) | 5.8 (5.5–6.2)    | 24.9 (24.2–25.6) | 64 (62.6–65.5)   | 12.6 (11.6–13.6) | 23.3 (22–24.7)   | 100 (100–100) |
| All               | +85   | 2010 | 2 (1.8–2.2)      | 2.8 (2.5–3)   | 32.1 (31.4–32.8) | 36.9 (36.2–37.6) | 5.5 (4.9–6)      | 7.6 (6.9–8.2)    | 87 (86.2–87.8)   | 100 (100–100) |
| All               | +85   | 2018 | 1.3 (1.1–1.5)    | 1.6 (1.4–1.7) | 35.5 (34.8–36.2) | 38.4 (37.7–39.1) | 3.4 (3–3.8)      | 4.1 (3.6–4.5)    | 92.6 (91.9–93.2) | 100 (100–100) |
| Femur             | 40–54 | 1995 | 0.3 (0.2–0.3)    | 0 (0–0)       | 0.1 (0–0.1)      | 0.3 (0.3–0.3)    | 75.2 (72.1–78.2) | 7.6 (5.8–9.5)    | 17.2 (14.6–19.8) | 100 (100–100) |
| Femur             | 40–54 | 2010 | 0.4 (0.4–0.4)    | 0 (0–0)       | 0.3 (0.3–0.3)    | 0.7 (0.7–0.7)    | 54.8 (52.3–57.3) | 3.9 (3–4.9)      | 41.3 (38.8–43.8) | 100 (100–100) |
| Femur             | 40–54 | 2018 | 0.4 (0.4–0.5)    | 0 (0–0)       | 0.4 (0.4–0.4)    | 0.9 (0.9–0.9)    | 51.2 (48.8–53.5) | 4.1 (3.1–5)      | 44.8 (42.4–47.1) | 100 (100–100) |
| Femur             | 55–69 | 1995 | 0.7 (0.7–0.8)    | 0.1 (0.1–0.1) | 0.2 (0.2–0.3)    | 1.1 (1–1.2)      | 68.8 (66.6–71.1) | 9 (7.6–10.4)     | 22.1 (20.1–24.1) | 100 (100–100) |
| Femur             | 55–69 | 2010 | 0.2 (0.2–0.2)    | 0 (0–0.1)     | 0.9 (0.9–1)      | 1.1 (1.1–1.1)    | 15.6 (14.1–17.2) | 3.6 (2.8–4.4)    | 80.8 (79.1–82.5) | 100 (100–100) |
| Femur             | 55–69 | 2018 | 0.3 (0.2–0.3)    | 0 (0–0.1)     | 1.1 (1.1–1.2)    | 1.4 (1.3–1.5)    | 18.5 (17–20.1)   | 2.9 (2.2–3.5)    | 78.6 (77–80.2)   | 100 (100–100) |
| Femur             | 70–84 | 1995 | 3.2 (3.1–3.3)    | 0.4 (0.4–0.5) | 1.3 (1.2–1.3)    | 4.9 (4.8–5)      | 65.6 (64.2–67)   | 8.5 (7.7–9.3)    | 25.9 (24.6–27.1) | 100 (100–100) |
| Femur             | 70–84 | 2010 | 0.4 (0.4–0.4)    | 0.1 (0.1–0.2) | 4 (3.9–4.2)      | 4.6 (4.5–4.7)    | 8.6 (7.7–9.5)    | 2.9 (2.4–3.4)    | 88.5 (87.5–89.5) | 100 (100–100) |
| Femur             | 70–84 | 2018 | 0.2 (0.2–0.2)    | 0.1 (0.1–0.1) | 3.4 (3.3–3.5)    | 3.7 (3.6–3.8)    | 4.9 (4.2–5.5)    | 1.9 (1.4–2.3)    | 93.3 (92.5–94.1) | 100 (100–100) |
| Femur             | +85   | 1995 | 10.6 (10.1–11)   | 1.6 (1.4–1.7) | 3.6 (3.3–3.9)    | 15.7 (15.1–16.3) | 67.2 (65.4–69)   | 9.9 (8.7–11)     | 22.9 (21.3–24.6) | 100 (100–100) |
| Femur             | +85   | 2010 | 0.8 (0.7–0.9)    | 0.6 (0.5–0.8) | 15 (14.5–15.5)   | 16.4 (15.9–16.9) | 4.9 (4.1–5.7)    | 3.9 (3.2–4.6)    | 91.2 (90.1–92.2) | 100 (100–100) |
| Femur             | +85   | 2018 | 0.4 (0.3–0.5)    | 0.3 (0.2–0.3) | 13.5 (13–13.9)   | 14.1 (13.6–14.6) | 2.9 (2.2–3.5)    | 1.9 (1.4–2.4)    | 95.2 (94.4–96)   | 100 (100–100) |
| Neck and trunk    | 40–54 | 1995 | 0.8 (0.7–0.8)    | 0 (0–0)       | 0.1 (0.1–0.1)    | 0.9 (0.9–0.9)    | 88.3 (86.9–89.7) | 2.5 (1.8–3.2)    | 9.2 (8–10.5)     | 100 (100–100) |
| Neck and trunk    | 40–54 | 2010 | 0.7 (0.6–0.7)    | 0.1 (0–0.1)   | 0.7 (0.7–0.8)    | 1.4 (1.4–1.4)    | 45 (43.2–46.7)   | 3.7 (3.1–4.4)    | 51.3 (49.5–53.1) | 100 (100–100) |
| Neck and trunk    | 40–54 | 2018 | 0.4 (0.4–0.5)    | 0 (0–0)       | 1.1 (1.1–1.2)    | 1.6 (1.5–1.7)    | 27.1 (25.5–28.6) | 2.5 (2–3.1)      | 70.4 (68.8–72)   | 100 (100–100) |
| Neck and trunk    | 55–69 | 1995 | 1.1 (1–1.1)      | 0 (0–0)       | 0.1 (0.1–0.1)    | 1.2 (1.1–1.3)    | 88.7 (87.2–90.1) | 1.3 (0.8–1.9)    | 10 (8.6–11.3)    | 100 (100–100) |
| Neck and trunk    | 55–69 | 2010 | 0.6 (0.6–0.7)    | 0.1 (0–0.1)   | 1 (0.9–1)        | 1.7 (1.6–1.8)    | 38.7 (37–40.5)   | 3.1 (2.5–3.8)    | 58.1 (56.4–59.9) | 100 (100–100) |
| Neck and trunk    | 55–69 | 2018 | 0.6 (0.6–0.6)    | 0 (0–0.1)     | 1.5 (1.4–1.5)    | 2.1 (2–2.2)      | 28.6 (27.1–30.1) | 2.3 (1.8–2.8)    | 69.1 (67.6–70.6) | 100 (100–100) |
| Neck and trunk    | 70–84 | 1995 | 2.1 (2–2.2)      | 0 (0–0.1)     | 0.4 (0.3–0.4)    | 2.5 (2.4–2.6)    | 83.8 (82.3–85.3) | 1.9 (1.3–2.4)    | 14.3 (12.9–15.7) | 100 (100–100) |

|                         |       |      |                  |               |                  |                  |                  |                |                  |               |
|-------------------------|-------|------|------------------|---------------|------------------|------------------|------------------|----------------|------------------|---------------|
| Neck and trunk          | 70–84 | 2010 | 0.9 (0.8–0.9)    | 0.1 (0–0.1)   | 1.8 (1.7–1.9)    | 2.7 (2.6–2.8)    | 31.4 (29.5–33.2) | 2.1 (1.5–2.7)  | 66.5 (64.6–68.4) | 100 (100–100) |
| Neck and trunk          | 70–84 | 2018 | 0.6 (0.6–0.7)    | 0 (0–0.1)     | 2.6 (2.5–2.7)    | 3.3 (3.2–3.4)    | 18.5 (17.2–19.8) | 1.4 (1–1.8)    | 80.1 (78.8–81.4) | 100 (100–100) |
| Neck and trunk          | +85   | 1995 | 3.9 (3.6–4.2)    | 0.2 (0.1–0.2) | 0.9 (0.8–1.1)    | 5 (4.7–5.3)      | 78.4 (75.6–81.2) | 3.1 (1.9–4.3)  | 18.5 (15.8–21.2) | 100 (100–100) |
| Neck and trunk          | +85   | 2010 | 1.1 (1–1.3)      | 0.1 (0.1–0.2) | 4.9 (4.6–5.2)    | 6.1 (5.7–6.5)    | 18.2 (15.9–20.5) | 2.3 (1.4–3.2)  | 79.5 (77.2–81.9) | 100 (100–100) |
| Neck and trunk          | +85   | 2018 | 0.7 (0.6–0.8)    | 0.1 (0.1–0.2) | 6.1 (5.8–6.5)    | 6.9 (6.5–7.3)    | 10.1 (8.5–11.8)  | 1.6 (0.9–2.2)  | 88.3 (86.6–90.1) | 100 (100–100) |
| Upper limb              | 40–54 | 1995 | 1.2 (1.2–1.3)    | 0.1 (0–0.1)   | 0.8 (0.7–0.8)    | 2.1 (2–2.2)      | 59.8 (58.4–61.2) | 2.8 (2.3–3.2)  | 37.4 (36.1–38.8) | 100 (100–100) |
| Upper limb              | 40–54 | 2010 | 1.8 (1.7–1.8)    | 0.4 (0.4–0.4) | 8.6 (8.5–8.7)    | 10.8 (10.7–10.9) | 16.3 (15.8–16.8) | 3.6 (3.4–3.9)  | 80.1 (79.6–80.6) | 100 (100–100) |
| Upper limb              | 40–54 | 2018 | 2.4 (2.3–2.5)    | 0.7 (0.7–0.7) | 12.6 (12.5–12.8) | 15.7 (15.5–15.9) | 15.3 (14.9–15.7) | 4.4 (4.2–4.7)  | 80.3 (79.9–80.7) | 100 (100–100) |
| Upper limb              | 55–69 | 1995 | 1.5 (1.5–1.6)    | 0.1 (0.1–0.1) | 1.2 (1.2–1.3)    | 2.9 (2.8–3)      | 53.4 (52–54.9)   | 3.3 (2.8–3.9)  | 43.2 (41.7–44.7) | 100 (100–100) |
| Upper limb              | 55–69 | 2010 | 0.9 (0.9–1)      | 0.2 (0.2–0.3) | 10.6 (10.5–10.7) | 11.8 (11.7–11.9) | 8 (7.7–8.4)      | 2 (1.8–2.2)    | 90 (89.6–90.4)   | 100 (100–100) |
| Upper limb              | 55–69 | 2018 | 1.1 (1–1.1)      | 0.3 (0.3–0.4) | 14.6 (14.4–14.8) | 16 (15.8–16.2)   | 6.7 (6.4–7)      | 2 (1.9–2.2)    | 91.3 (91–91.6)   | 100 (100–100) |
| Upper limb              | 70–84 | 1995 | 3.2 (3.1–3.3)    | 0.2 (0.2–0.3) | 2 (1.9–2.1)      | 5.4 (5.3–5.5)    | 58.7 (57.4–60)   | 4.5 (4–5.1)    | 36.8 (35.5–38.1) | 100 (100–100) |
| Upper limb              | 70–84 | 2010 | 1 (0.9–1.1)      | 0.4 (0.3–0.4) | 14.6 (14.3–14.8) | 15.9 (15.7–16.1) | 6.2 (5.8–6.6)    | 2.4 (2.2–2.7)  | 91.4 (90.9–91.8) | 100 (100–100) |
| Upper limb              | 70–84 | 2018 | 0.8 (0.7–0.8)    | 0.3 (0.3–0.3) | 18.2 (18–18.4)   | 19.2 (19–19.4)   | 4 (3.7–4.3)      | 1.5 (1.3–1.7)  | 94.5 (94.2–94.8) | 100 (100–100) |
| Upper limb              | +85   | 1995 | 6.2 (5.8–6.6)    | 0.5 (0.4–0.6) | 3.1 (2.8–3.4)    | 9.8 (9.3–10.3)   | 63 (60.6–65.4)   | 5.4 (4.3–6.5)  | 31.6 (29.4–33.9) | 100 (100–100) |
| Upper limb              | +85   | 2010 | 1.5 (1.3–1.7)    | 1.1 (0.9–1.2) | 22.2 (21.5–22.8) | 24.7 (24.1–25.3) | 6.1 (5.4–6.8)    | 4.3 (3.7–4.9)  | 89.6 (88.7–90.5) | 100 (100–100) |
| Upper limb              | +85   | 2018 | 1 (0.9–1.1)      | 0.6 (0.5–0.8) | 25.9 (25.3–26.6) | 27.6 (27–28.2)   | 3.6 (3.1–4.1)    | 2.3 (1.9–2.8)  | 94 (93.4–94.7)   | 100 (100–100) |
| <b>Gastrointestinal</b> |       |      |                  |               |                  |                  |                  |                |                  |               |
| All                     | 40–54 | 1995 | 3.3 (3.3–3.4)    | 0.4 (0.4–0.5) | 0.7 (0.7–0.8)    | 4.5 (4.4–4.6)    | 74.3 (73.5–75.1) | 9.7 (9.1–10.3) | 16 (15.3–16.7)   | 100 (100–100) |
| All                     | 40–54 | 2010 | 3.5 (3.4–3.5)    | 0.5 (0.5–0.5) | 5.4 (5.3–5.5)    | 9.3 (9.2–9.4)    | 37.2 (36.5–37.8) | 5.5 (5.1–5.8)  | 57.4 (56.7–58.1) | 100 (100–100) |
| All                     | 40–54 | 2018 | 3.8 (3.7–3.9)    | 0.5 (0.4–0.5) | 8.2 (8.1–8.4)    | 12.5 (12.4–12.6) | 30.2 (29.7–30.8) | 3.7 (3.5–3.9)  | 66.1 (65.5–66.6) | 100 (100–100) |
| All                     | 55–69 | 1995 | 5.1 (5–5.2)      | 0.5 (0.5–0.6) | 1.1 (1–1.1)      | 6.7 (6.6–6.8)    | 75.6 (74.8–76.4) | 8.1 (7.6–8.7)  | 16.3 (15.5–17)   | 100 (100–100) |
| All                     | 55–69 | 2010 | 2.5 (2.4–2.6)    | 0.8 (0.8–0.9) | 7.7 (7.6–7.8)    | 11 (10.9–11.1)   | 22.6 (22–23.2)   | 7.5 (7.2–7.9)  | 69.9 (69.2–70.5) | 100 (100–100) |
| All                     | 55–69 | 2018 | 2.5 (2.5–2.6)    | 0.8 (0.8–0.9) | 11.9 (11.8–12.1) | 15.3 (15.1–15.5) | 16.6 (16.1–17)   | 5.5 (5.2–5.8)  | 77.9 (77.4–78.4) | 100 (100–100) |
| All                     | 70–84 | 1995 | 7.6 (7.4–7.8)    | 0.8 (0.7–0.8) | 1.7 (1.6–1.8)    | 10.1 (9.9–10.3)  | 75.7 (74.8–76.5) | 7.6 (7–8.1)    | 16.7 (16–17.5)   | 100 (100–100) |
| All                     | 70–84 | 2010 | 3 (2.8–3.1)      | 1.3 (1.3–1.4) | 12 (11.8–12.2)   | 16.3 (16.1–16.5) | 18.1 (17.5–18.8) | 8.3 (7.8–8.7)  | 73.6 (72.8–74.3) | 100 (100–100) |
| All                     | 70–84 | 2018 | 2.2 (2.1–2.2)    | 1.2 (1.1–1.2) | 16.6 (16.4–16.9) | 20 (19.8–20.2)   | 10.8 (10.4–11.2) | 5.8 (5.5–6.1)  | 83.4 (82.9–83.9) | 100 (100–100) |
| All                     | +85   | 1995 | 11.1 (10.6–11.6) | 1 (0.8–1.1)   | 2 (1.7–2.2)      | 14.1 (13.6–14.6) | 79 (77.4–80.7)   | 7.1 (6–8.1)    | 13.9 (12.5–15.3) | 100 (100–100) |
| All                     | +85   | 2010 | 3.5 (3.2–3.8)    | 1.7 (1.5–1.9) | 15.8 (15.3–16.3) | 21 (20.4–21.6)   | 16.6 (15.4–17.8) | 8.2 (7.4–9.1)  | 75.2 (73.8–76.5) | 100 (100–100) |
| All                     | +85   | 2018 | 2.5 (2.3–2.8)    | 1.6 (1.4–1.8) | 20.9 (20.3–21.5) | 25.1 (24.5–25.7) | 10.1 (9.2–11)    | 6.5 (5.7–7.2)  | 83.4 (82.4–84.5) | 100 (100–100) |
| Appendicitis            | 40–54 | 1995 | 1.5 (1.4–1.5)    | 0 (0–0)       | 0.1 (0.1–0.1)    | 1.6 (1.5–1.7)    | 93.3 (92.5–94.1) | 0.3 (0.1–0.4)  | 6.4 (5.6–7.2)    | 100 (100–100) |
| Appendicitis            | 40–54 | 2010 | 3.2 (3.1–3.3)    | 0 (0–0)       | 1.5 (1.5–1.6)    | 4.7 (4.6–4.8)    | 67.8 (66.9–68.7) | 0.1 (0–0.2)    | 32.1 (31.2–33)   | 100 (100–100) |
| Appendicitis            | 40–54 | 2018 | 3.9 (3.8–4)      | 0 (0–0)       | 2.8 (2.8–2.9)    | 6.7 (6.6–6.8)    | 57.6 (56.7–58.4) | 0.1 (0–0.1)    | 42.4 (41.5–43.2) | 100 (100–100) |
| Appendicitis            | 55–69 | 1995 | 1.2 (1.1–1.3)    | 0 (0–0)       | 0.1 (0.1–0.1)    | 1.3 (1.2–1.4)    | 93.1 (92–94.2)   | 0.3 (0–0.5)    | 6.7 (5.6–7.8)    | 100 (100–100) |
| Appendicitis            | 55–69 | 2010 | 1.5 (1.4–1.5)    | 0 (0–0)       | 1.1 (1.1–1.2)    | 2.6 (2.5–2.7)    | 56.8 (55.4–58.2) | 0.1 (0–0.2)    | 43.1 (41.7–44.5) | 100 (100–100) |
| Appendicitis            | 55–69 | 2018 | 2.2 (2.1–2.3)    | 0 (0–0)       | 2 (1.9–2)        | 4.2 (4.1–4.3)    | 52.9 (51.7–54)   | 0.1 (0–0.1)    | 47.1 (45.9–48.2) | 100 (100–100) |
| Appendicitis            | 70–84 | 1995 | 1.1 (1–1.2)      | 0 (0–0)       | 0.1 (0.1–0.1)    | 1.2 (1.1–1.3)    | 91.5 (89.9–93.1) | 0 (0–0)        | 8.5 (6.9–10.1)   | 100 (100–100) |
| Appendicitis            | 70–84 | 2010 | 1.2 (1.1–1.2)    | 0 (0–0)       | 1.1 (1–1.2)      | 2.3 (2.2–2.4)    | 51.7 (49.4–53.9) | 0.3 (0–0.5)    | 48.1 (45.9–50.3) | 100 (100–100) |
| Appendicitis            | 70–84 | 2018 | 1.3 (1.3–1.4)    | 0 (0–0)       | 1.7 (1.6–1.8)    | 3 (2.9–3.1)      | 44 (42.3–45.6)   | 0.2 (0–0.3)    | 55.9 (54.2–57.6) | 100 (100–100) |
| Appendicitis            | +85   | 1995 | 1.1 (0.9–1.2)    | 0 (0–0)       | 0.1 (0–0.1)      | 1.1 (0.9–1.3)    | 94.4 (91.1–97.8) | 0 (0–0)        | 5.6 (2.2–8.9)    | 100 (100–100) |
| Appendicitis            | +85   | 2010 | 1.1 (0.9–1.2)    | 0 (0–0.1)     | 0.9 (0.8–1.1)    | 2 (1.8–2.2)      | 52.8 (47.6–57.9) | 1.4 (0.2–2.6)  | 45.8 (40.7–51)   | 100 (100–100) |
| Appendicitis            | +85   | 2018 | 1.2 (1–1.3)      | 0 (0–0)       | 1.6 (1.4–1.8)    | 2.8 (2.6–3)      | 42.3 (38.1–46.6) | 0 (0–0)        | 57.7 (53.4–61.9) | 100 (100–100) |
| Cholecystitis           | 40–54 | 1995 | 0.2 (0.2–0.2)    | 0 (0–0)       | 0 (0–0)          | 0.2 (0.2–0.2)    | 87.4 (84.5–90.2) | 1 (0.1–1.8)    | 11.7 (8.9–14.4)  | 100 (100–100) |
| Cholecystitis           | 40–54 | 2010 | 0.1 (0.1–0.1)    | 0 (0–0)       | 0.3 (0.3–0.3)    | 0.4 (0.4–0.4)    | 17.1 (14.5–19.7) | 0.6 (0.1–1.2)  | 82.3 (79.6–84.9) | 100 (100–100) |
| Cholecystitis           | 40–54 | 2018 | 0 (0–0)          | 0 (0–0)       | 0.5 (0.4–0.5)    | 0.5 (0.5–0.5)    | 5.5 (4.1–6.9)    | 0 (0–0)        | 94.5 (93.1–95.9) | 100 (100–100) |
| Cholecystitis           | 55–69 | 1995 | 0.4 (0.4–0.5)    | 0 (0–0)       | 0.1 (0–0.1)      | 0.5 (0.5–0.5)    | 88 (85.7–90.3)   | 0.7 (0.1–1.2)  | 11.3 (9.1–13.6)  | 100 (100–100) |

|                      |       |      |               |               |                  |               |                  |                  |                  |               |
|----------------------|-------|------|---------------|---------------|------------------|---------------|------------------|------------------|------------------|---------------|
| Cholecystitis        | 55-69 | 2010 | 0.2 (0.2-0.2) | 0 (0-0)       | 0.4 (0.4-0.5)    | 0.6 (0.6-0.6) | 27.9 (25.3-30.5) | 0 (0-0)          | 72.1 (69.5-74.7) | 100 (100-100) |
| Cholecystitis        | 55-69 | 2018 | 0.1 (0.1-0.1) | 0 (0-0)       | 0.7 (0.7-0.8)    | 0.9 (0.9-0.9) | 13.8 (12.1-15.6) | 0.3 (0-0.6)      | 85.9 (84.1-87.6) | 100 (100-100) |
| Cholecystitis        | 70-84 | 1995 | 0.9 (0.8-1)   | 0 (0-0)       | 0.1 (0.1-0.1)    | 1 (0.9-1.1)   | 89.2 (87.2-91.1) | 0.5 (0.1-1)      | 10.3 (8.4-12.2)  | 100 (100-100) |
| Cholecystitis        | 70-84 | 2010 | 0.4 (0.3-0.4) | 0 (0-0)       | 0.8 (0.8-0.9)    | 1.2 (1.1-1.3) | 30 (27.2-32.9)   | 0.5 (0.1-0.9)    | 69.5 (66.6-72.3) | 100 (100-100) |
| Cholecystitis        | 70-84 | 2018 | 0.2 (0.2-0.2) | 0 (0-0)       | 1.1 (1.1-1.2)    | 1.3 (1.2-1.4) | 15.8 (14-17.7)   | 0 (0-0)          | 84.2 (82.3-86)   | 100 (100-100) |
| Cholecystitis        | +85   | 1995 | 1.6 (1.4-1.8) | 0 (0-0.1)     | 0.1 (0.1-0.2)    | 1.8 (1.6-2)   | 91.2 (87.9-94.5) | 1.8 (0.2-3.3)    | 7 (4.1-10)       | 100 (100-100) |
| Cholecystitis        | +85   | 2010 | 0.8 (0.6-0.9) | 0 (0-0)       | 1.4 (1.2-1.6)    | 2.1 (1.9-2.3) | 35.1 (30.3-39.8) | 0 (0-0)          | 64.9 (60.2-69.7) | 100 (100-100) |
| Cholecystitis        | +85   | 2018 | 0.5 (0.4-0.6) | 0 (0-0)       | 1.9 (1.7-2.1)    | 2.3 (2.1-2.5) | 19.8 (16-23.5)   | 0 (0-0)          | 80.2 (76.5-84)   | 100 (100-100) |
| Diverticular disease | 40-54 | 1995 | 0.1 (0.1-0.2) | 0 (0-0)       | 0.1 (0-0.1)      | 0.2 (0.2-0.2) | 67.3 (63.2-71.4) | 5 (3.1-6.8)      | 27.7 (23.8-31.6) | 100 (100-100) |
| Diverticular disease | 40-54 | 2010 | 0 (0-0)       | 0 (0-0)       | 0.6 (0.6-0.6)    | 0.6 (0.6-0.6) | 1.9 (1.2-2.6)    | 0.8 (0.3-1.2)    | 97.4 (96.5-98.2) | 100 (100-100) |
| Diverticular disease | 40-54 | 2018 | 0 (0-0)       | 0 (0-0)       | 1.3 (1.3-1.4)    | 1.3 (1.3-1.3) | 0.4 (0.1-0.6)    | 0 (0-0)          | 99.6 (99.4-99.9) | 100 (100-100) |
| Diverticular disease | 55-69 | 1995 | 0.7 (0.6-0.7) | 0 (0-0)       | 0.2 (0.2-0.2)    | 0.9 (0.9-0.9) | 73.1 (70.8-75.5) | 4.2 (3.2-5.3)    | 22.6 (20.4-24.8) | 100 (100-100) |
| Diverticular disease | 55-69 | 2010 | 0.1 (0.1-0.1) | 0 (0-0)       | 2 (2-2.1)        | 2.1 (2-2.2)   | 4 (3.4-4.6)      | 1.3 (0.9-1.6)    | 94.8 (94.1-95.5) | 100 (100-100) |
| Diverticular disease | 55-69 | 2018 | 0 (0-0)       | 0 (0-0)       | 4.4 (4.3-4.5)    | 4.4 (4.3-4.5) | 0.6 (0.4-0.8)    | 0.4 (0.3-0.5)    | 99 (98.8-99.2)   | 100 (100-100) |
| Diverticular disease | 70-84 | 1995 | 2 (1.9-2.1)   | 0.1 (0.1-0.2) | 0.5 (0.4-0.5)    | 2.6 (2.5-2.7) | 76.7 (75-78.3)   | 5.5 (4.6-6.4)    | 17.8 (16.4-19.3) | 100 (100-100) |
| Diverticular disease | 70-84 | 2010 | 0.4 (0.4-0.5) | 0.2 (0.2-0.2) | 4.8 (4.6-4.9)    | 5.4 (5.2-5.6) | 7.8 (7.1-8.6)    | 3.4 (2.9-4)      | 88.7 (87.8-89.6) | 100 (100-100) |
| Diverticular disease | 70-84 | 2018 | 0.1 (0.1-0.2) | 0.1 (0.1-0.1) | 8.3 (8.2-8.5)    | 8.6 (8.4-8.8) | 1.6 (1.3-1.8)    | 1.1 (0.9-1.3)    | 97.3 (97-97.6)   | 100 (100-100) |
| Diverticular disease | +85   | 1995 | 4 (3.7-4.3)   | 0.2 (0.2-0.3) | 0.6 (0.5-0.7)    | 4.9 (4.6-5.2) | 82.2 (79.5-84.8) | 5.1 (3.6-6.6)    | 12.7 (10.4-15.1) | 100 (100-100) |
| Diverticular disease | +85   | 2010 | 0.9 (0.8-1)   | 0.4 (0.3-0.5) | 6.6 (6.3-7)      | 8 (7.6-8.4)   | 11.2 (9.6-12.9)  | 5.3 (4.1-6.4)    | 83.5 (81.6-85.4) | 100 (100-100) |
| Diverticular disease | +85   | 2018 | 0.5 (0.4-0.6) | 0.3 (0.2-0.4) | 10.7 (10.3-11.2) | 11.5 (11-12)  | 4.2 (3.4-5.1)    | 2.8 (2.1-3.5)    | 93 (91.9-94.1)   | 100 (100-100) |
| IBD                  | 40-54 | 1995 | 0.2 (0.2-0.2) | 0.2 (0.1-0.2) | 0.1 (0.1-0.1)    | 0.4 (0.4-0.4) | 38 (35-40.9)     | 35.6 (32.7-38.5) | 26.4 (23.8-29.1) | 100 (100-100) |
| IBD                  | 40-54 | 2010 | 0.1 (0.1-0.1) | 0.2 (0.2-0.2) | 0.8 (0.8-0.9)    | 1.1 (1.1-1.1) | 7.1 (6.1-8.2)    | 18.4 (16.9-20)   | 74.4 (72.7-76.2) | 100 (100-100) |
| IBD                  | 40-54 | 2018 | 0 (0-0)       | 0.2 (0.1-0.2) | 1.4 (1.4-1.5)    | 1.6 (1.5-1.7) | 2.4 (1.8-2.9)    | 9.4 (8.4-10.4)   | 88.2 (87.1-89.4) | 100 (100-100) |
| IBD                  | 55-69 | 1995 | 0.2 (0.2-0.2) | 0.1 (0.1-0.1) | 0.1 (0.1-0.1)    | 0.4 (0.4-0.4) | 45.2 (41.2-49.1) | 30.6 (27-34.3)   | 24.2 (20.8-27.6) | 100 (100-100) |
| IBD                  | 55-69 | 2010 | 0.1 (0.1-0.1) | 0.2 (0.2-0.2) | 0.7 (0.7-0.8)    | 1.1 (1.1-1.1) | 9 (7.8-10.3)     | 20.7 (18.9-22.5) | 70.3 (68.2-72.3) | 100 (100-100) |
| IBD                  | 55-69 | 2018 | 0.1 (0.1-0.1) | 0.2 (0.2-0.3) | 1.3 (1.2-1.3)    | 1.6 (1.5-1.7) | 5.2 (4.3-6)      | 15.7 (14.3-17)   | 79.2 (77.7-80.7) | 100 (100-100) |
| IBD                  | 70-84 | 1995 | 0.2 (0.2-0.2) | 0.1 (0.1-0.1) | 0.1 (0.1-0.1)    | 0.4 (0.4-0.4) | 46.8 (41.9-51.8) | 26.6 (22.2-30.9) | 26.6 (22.2-30.9) | 100 (100-100) |
| IBD                  | 70-84 | 2010 | 0.1 (0.1-0.1) | 0.2 (0.2-0.2) | 0.9 (0.8-0.9)    | 1.2 (1.1-1.3) | 7.9 (6.2-9.5)    | 16.7 (14.5-19)   | 75.4 (72.7-78)   | 100 (100-100) |
| IBD                  | 70-84 | 2018 | 0.1 (0.1-0.1) | 0.2 (0.2-0.2) | 1.2 (1.2-1.3)    | 1.5 (1.4-1.6) | 5.5 (4.4-6.6)    | 12.8 (11.2-14.4) | 81.7 (79.8-83.6) | 100 (100-100) |
| IBD                  | +85   | 1995 | 0.3 (0.3-0.4) | 0.1 (0-0.1)   | 0 (0-0.1)        | 0.4 (0.3-0.5) | 78.6 (69-88.2)   | 14.3 (6.1-22.5)  | 7.1 (1.1-13.2)   | 100 (100-100) |
| IBD                  | +85   | 2010 | 0.1 (0.1-0.2) | 0.2 (0.1-0.3) | 0.8 (0.7-0.9)    | 1.1 (0.9-1.3) | 10 (5.8-14.2)    | 17.5 (12.2-22.8) | 72.5 (66.3-78.7) | 100 (100-100) |
| IBD                  | +85   | 2018 | 0.1 (0-0.1)   | 0.2 (0.1-0.3) | 1.3 (1.1-1.5)    | 1.6 (1.4-1.8) | 5.2 (2.6-7.7)    | 12.1 (8.3-15.8)  | 82.8 (78.4-87.1) | 100 (100-100) |
| Liver disease        | 40-54 | 1995 | 0.3 (0.3-0.3) | 0.1 (0.1-0.1) | 0.1 (0.1-0.2)    | 0.5 (0.5-0.5) | 58.8 (56.1-61.5) | 15.3 (13.3-17.3) | 25.9 (23.5-28.3) | 100 (100-100) |
| Liver disease        | 40-54 | 2010 | 0.1 (0-0.1)   | 0 (0-0)       | 0.9 (0.9-1)      | 1 (1-1)       | 5.7 (4.8-6.7)    | 3 (2.3-3.7)      | 91.3 (90.1-92.5) | 100 (100-100) |
| Liver disease        | 40-54 | 2018 | 0 (0-0)       | 0 (0-0)       | 1.1 (1.1-1.2)    | 1.1 (1.1-1.1) | 1.8 (1.2-2.3)    | 0.7 (0.3-1)      | 97.6 (97-98.2)   | 100 (100-100) |
| Liver disease        | 55-69 | 1995 | 0.5 (0.4-0.5) | 0.1 (0.1-0.1) | 0.1 (0.1-0.2)    | 0.7 (0.7-0.7) | 65 (62.2-67.8)   | 15.2 (13.1-17.4) | 19.7 (17.4-22.1) | 100 (100-100) |
| Liver disease        | 55-69 | 2010 | 0.2 (0.1-0.2) | 0.1 (0-0.1)   | 1.2 (1.1-1.2)    | 1.4 (1.3-1.5) | 11.4 (10.2-12.7) | 4 (3.2-4.8)      | 84.6 (83.2-86)   | 100 (100-100) |
| Liver disease        | 55-69 | 2018 | 0.1 (0.1-0.1) | 0 (0-0.1)     | 1.7 (1.6-1.8)    | 1.9 (1.8-2)   | 5.2 (4.4-5.9)    | 2.7 (2.1-3.2)    | 92.2 (91.2-93.1) | 100 (100-100) |
| Liver disease        | 70-84 | 1995 | 0.3 (0.3-0.3) | 0.1 (0-0.1)   | 0.1 (0.1-0.1)    | 0.5 (0.5-0.5) | 66.7 (62.2-71.1) | 13.8 (10.6-17)   | 19.5 (15.8-23.3) | 100 (100-100) |
| Liver disease        | 70-84 | 2010 | 0.2 (0.1-0.2) | 0.1 (0-0.1)   | 0.8 (0.7-0.8)    | 1 (0.9-1.1)   | 15.7 (13.3-18.1) | 5.2 (3.7-6.7)    | 79.1 (76.4-81.8) | 100 (100-100) |
| Liver disease        | 70-84 | 2018 | 0.1 (0.1-0.1) | 0 (0-0)       | 1.3 (1.2-1.4)    | 1.5 (1.4-1.6) | 8.4 (7-9.7)      | 2.5 (1.7-3.2)    | 89.2 (87.6-90.7) | 100 (100-100) |
| Liver disease        | +85   | 1995 | 0.2 (0.1-0.2) | 0 (0-0)       | 0 (0-0.1)        | 0.2 (0.1-0.3) | 83.3 (70-96.7)   | 0 (0-0)          | 16.7 (3.3-30)    | 100 (100-100) |
| Liver disease        | +85   | 2010 | 0.1 (0-0.1)   | 0 (0-0.1)     | 0.3 (0.2-0.4)    | 0.4 (0.3-0.5) | 20 (10.9-29.1)   | 6.7 (1-12.3)     | 73.3 (63.3-83.3) | 100 (100-100) |
| Liver disease        | +85   | 2018 | 0.1 (0.1-0.2) | 0.1 (0-0.1)   | 0.6 (0.5-0.7)    | 0.8 (0.7-0.9) | 14.3 (8.5-20.1)  | 7.1 (2.9-11.4)   | 78.6 (71.8-85.4) | 100 (100-100) |
| Pancreatitis         | 40-54 | 1995 | 0.2 (0.2-0.3) | 0.1 (0.1-0.1) | 0.1 (0.1-0.1)    | 0.4 (0.4-0.4) | 58.7 (55.6-61.9) | 15.3 (13-17.6)   | 25.9 (23.1-28.7) | 100 (100-100) |
| Pancreatitis         | 40-54 | 2010 | 0.1 (0.1-0.1) | 0 (0-0)       | 0.5 (0.5-0.6)    | 0.6 (0.6-0.6) | 11.5 (9.8-13.2)  | 3.1 (2.1-4)      | 85.4 (83.5-87.4) | 100 (100-100) |

|                     |       |      |               |               |                  |                  |                  |                |                  |               |
|---------------------|-------|------|---------------|---------------|------------------|------------------|------------------|----------------|------------------|---------------|
| Pancreatitis        | 40–54 | 2018 | 0 (0–0)       | 0 (0–0)       | 0.7 (0.7–0.7)    | 0.7 (0.7–0.7)    | 4 (3–5)          | 1.3 (0.8–1.9)  | 94.6 (93.5–95.8) | 100 (100–100) |
| Pancreatitis        | 55–69 | 1995 | 0.3 (0.2–0.3) | 0 (0–0)       | 0.1 (0.1–0.1)    | 0.4 (0.4–0.4)    | 63 (59.2–66.7)   | 9.4 (7.2–11.7) | 27.6 (24.1–31)   | 100 (100–100) |
| Pancreatitis        | 55–69 | 2010 | 0.1 (0.1–0.2) | 0 (0–0.1)     | 0.7 (0.7–0.8)    | 0.9 (0.9–0.9)    | 15.8 (14.1–17.6) | 5.3 (4.2–6.3)  | 78.9 (76.9–80.8) | 100 (100–100) |
| Pancreatitis        | 55–69 | 2018 | 0.1 (0.1–0.1) | 0 (0–0.1)     | 1.1 (1–1.1)      | 1.2 (1.1–1.3)    | 7.6 (6.5–8.7)    | 3.6 (2.8–4.4)  | 88.8 (87.5–90.2) | 100 (100–100) |
| Pancreatitis        | 70–84 | 1995 | 0.3 (0.3–0.3) | 0 (0–0)       | 0.1 (0.1–0.1)    | 0.4 (0.4–0.4)    | 69.8 (65.4–74.1) | 5.8 (3.6–8)    | 24.4 (20.4–28.5) | 100 (100–100) |
| Pancreatitis        | 70–84 | 2010 | 0.2 (0.1–0.2) | 0 (0–0.1)     | 0.9 (0.8–1)      | 1.1 (1–1.2)      | 14.1 (11.9–16.3) | 3.7 (2.5–4.9)  | 82.2 (79.8–84.6) | 100 (100–100) |
| Pancreatitis        | 70–84 | 2018 | 0.1 (0.1–0.1) | 0 (0–0.1)     | 1.3 (1.3–1.4)    | 1.5 (1.4–1.6)    | 7.7 (6.4–9)      | 2.8 (2–3.6)    | 89.5 (88–91)     | 100 (100–100) |
| Pancreatitis        | +85   | 1995 | 0.4 (0.3–0.5) | 0 (0–0.1)     | 0.1 (0.1–0.2)    | 0.6 (0.5–0.7)    | 73.7 (64.8–82.5) | 5.3 (0.8–9.8)  | 21.1 (12.9–29.3) | 100 (100–100) |
| Pancreatitis        | +85   | 2010 | 0.2 (0.1–0.2) | 0.1 (0–0.1)   | 1 (0.9–1.2)      | 1.3 (1.1–1.5)    | 13.3 (8.9–17.8)  | 4.4 (1.8–7.1)  | 82.2 (77.2–87.2) | 100 (100–100) |
| Pancreatitis        | +85   | 2018 | 0.1 (0–0.1)   | 0 (0–0.1)     | 1.9 (1.7–2.1)    | 2 (1.8–2.2)      | 4.1 (2–6.1)      | 1.4 (0.2–2.5)  | 94.6 (92.3–96.9) | 100 (100–100) |
| UGB                 | 40–54 | 1995 | 0.4 (0.3–0.4) | 0 (0–0)       | 0.1 (0.1–0.1)    | 0.4 (0.4–0.4)    | 83.1 (80.8–85.4) | 2 (1.1–2.9)    | 14.9 (12.7–17.1) | 100 (100–100) |
| UGB                 | 40–54 | 2010 | 0.1 (0.1–0.1) | 0 (0–0)       | 0.3 (0.2–0.3)    | 0.4 (0.4–0.4)    | 27 (23.9–30)     | 1.8 (0.9–2.8)  | 71.2 (68.1–74.3) | 100 (100–100) |
| UGB                 | 40–54 | 2018 | 0 (0–0.1)     | 0 (0–0)       | 0.3 (0.3–0.3)    | 0.3 (0.3–0.3)    | 13 (10.4–15.6)   | 2.3 (1.1–3.4)  | 84.7 (82–87.5)   | 100 (100–100) |
| UGB                 | 55–69 | 1995 | 0.7 (0.6–0.7) | 0 (0–0)       | 0.2 (0.1–0.2)    | 0.9 (0.9–0.9)    | 79.3 (77.1–81.5) | 3.1 (2.1–4)    | 17.6 (15.6–19.7) | 100 (100–100) |
| UGB                 | 55–69 | 2010 | 0.2 (0.2–0.3) | 0 (0–0)       | 0.7 (0.7–0.7)    | 1 (1–1)          | 23.9 (21.9–25.9) | 2.6 (1.8–3.3)  | 73.6 (71.5–75.6) | 100 (100–100) |
| UGB                 | 55–69 | 2018 | 0.1 (0.1–0.2) | 0 (0–0)       | 0.6 (0.6–0.7)    | 0.8 (0.8–0.8)    | 17.5 (15.4–19.5) | 1.5 (0.8–2.1)  | 81 (78.9–83.1)   | 100 (100–100) |
| UGB                 | 70–84 | 1995 | 1.3 (1.3–1.4) | 0 (0–0.1)     | 0.4 (0.3–0.4)    | 1.7 (1.6–1.8)    | 77.2 (75.2–79.3) | 2.4 (1.7–3.1)  | 20.4 (18.4–22.3) | 100 (100–100) |
| UGB                 | 70–84 | 2010 | 0.4 (0.4–0.5) | 0.1 (0–0.1)   | 1.6 (1.5–1.7)    | 2.1 (2–2.2)      | 19.7 (17.8–21.5) | 2.8 (2–3.5)    | 77.6 (75.6–79.5) | 100 (100–100) |
| UGB                 | 70–84 | 2018 | 0.2 (0.2–0.3) | 0 (0–0)       | 1.3 (1.3–1.4)    | 1.6 (1.5–1.7)    | 15.2 (13.5–16.8) | 2.2 (1.6–2.9)  | 82.6 (80.8–84.3) | 100 (100–100) |
| UGB                 | +85   | 1995 | 2.3 (2.1–2.6) | 0.1 (0–0.1)   | 0.6 (0.5–0.7)    | 3 (2.7–3.3)      | 78.1 (74.4–81.8) | 2.1 (0.8–3.4)  | 19.8 (16.2–23.4) | 100 (100–100) |
| UGB                 | +85   | 2010 | 0.5 (0.4–0.6) | 0.1 (0–0.1)   | 3.3 (3–3.6)      | 3.9 (3.6–4.2)    | 13.6 (11–16.1)   | 2.1 (1.1–3.2)  | 84.3 (81.6–87)   | 100 (100–100) |
| UGB                 | +85   | 2018 | 0.3 (0.2–0.3) | 0.1 (0–0.1)   | 2.5 (2.3–2.8)    | 2.9 (2.7–3.1)    | 9.4 (6.9–11.9)   | 1.9 (0.7–3)    | 88.7 (86–91.4)   | 100 (100–100) |
| Ulcer disease       | 40–54 | 1995 | 0.8 (0.8–0.9) | 0.1 (0–0.1)   | 0.3 (0.2–0.3)    | 1.1 (1.1–1.1)    | 72.8 (71.1–74.4) | 4.9 (4–5.7)    | 22.4 (20.8–24)   | 100 (100–100) |
| Ulcer disease       | 40–54 | 2010 | 0.2 (0.1–0.2) | 0 (0–0)       | 1.2 (1.1–1.2)    | 1.4 (1.4–1.4)    | 11.2 (10–12.3)   | 1.7 (1.2–2.2)  | 87.1 (85.9–88.3) | 100 (100–100) |
| Ulcer disease       | 40–54 | 2018 | 0.1 (0–0.1)   | 0 (0–0)       | 1.3 (1.3–1.4)    | 1.4 (1.3–1.5)    | 3.9 (3.2–4.7)    | 0.9 (0.5–1.2)  | 95.2 (94.4–96)   | 100 (100–100) |
| Ulcer disease       | 55–69 | 1995 | 1.8 (1.8–1.9) | 0.1 (0.1–0.1) | 0.4 (0.4–0.5)    | 2.4 (2.3–2.5)    | 77.1 (75.7–78.5) | 4.6 (3.9–5.2)  | 18.3 (17.1–19.6) | 100 (100–100) |
| Ulcer disease       | 55–69 | 2010 | 0.6 (0.6–0.6) | 0.1 (0.1–0.2) | 2.2 (2.1–2.3)    | 2.9 (2.8–3)      | 20.4 (19.3–21.5) | 4.9 (4.4–5.5)  | 74.7 (73.5–75.8) | 100 (100–100) |
| Ulcer disease       | 55–69 | 2018 | 0.3 (0.3–0.3) | 0.1 (0.1–0.1) | 2.5 (2.4–2.6)    | 2.8 (2.7–2.9)    | 9.7 (8.9–10.6)   | 2.3 (1.8–2.7)  | 88 (87.1–88.9)   | 100 (100–100) |
| Ulcer disease       | 70–84 | 1995 | 2.7 (2.6–2.8) | 0.2 (0.2–0.2) | 0.7 (0.7–0.8)    | 3.6 (3.5–3.7)    | 74.8 (73.3–76.2) | 5.1 (4.3–5.8)  | 20.1 (18.8–21.5) | 100 (100–100) |
| Ulcer disease       | 70–84 | 2010 | 1.1 (1–1.2)   | 0.3 (0.2–0.3) | 3.8 (3.7–4)      | 5.2 (5.1–5.3)    | 20.9 (19.7–22.1) | 5 (4.4–5.7)    | 74.1 (72.8–75.4) | 100 (100–100) |
| Ulcer disease       | 70–84 | 2018 | 0.7 (0.6–0.7) | 0.2 (0.2–0.2) | 4 (3.9–4.1)      | 4.8 (4.7–4.9)    | 13.9 (13–14.8)   | 3.8 (3.3–4.4)  | 82.3 (81.2–83.3) | 100 (100–100) |
| Ulcer disease       | +85   | 1995 | 3.5 (3.2–3.8) | 0.2 (0.1–0.3) | 1 (0.8–1.1)      | 4.6 (4.3–4.9)    | 75.2 (72.1–78.3) | 4 (2.6–5.4)    | 20.8 (17.9–23.7) | 100 (100–100) |
| Ulcer disease       | +85   | 2010 | 1 (0.9–1.2)   | 0.3 (0.2–0.3) | 5.8 (5.4–6.1)    | 7.1 (6.7–7.5)    | 14.6 (12.7–16.6) | 3.6 (2.5–4.6)  | 81.8 (79.7–83.9) | 100 (100–100) |
| Ulcer disease       | +85   | 2018 | 0.9 (0.8–1.1) | 0.2 (0.1–0.3) | 5.9 (5.6–6.2)    | 7 (6.6–7.4)      | 13 (11.2–14.9)   | 3.1 (2.1–4)    | 83.9 (81.9–85.9) | 100 (100–100) |
| <b>Neurological</b> |       |      |               |               |                  |                  |                  |                |                  |               |
| All                 | 40–54 | 1995 | 0.4 (0.4–0.4) | 0 (0–0.1)     | 0.2 (0.2–0.2)    | 0.6 (0.6–0.6)    | 64.7 (62.2–67.2) | 7.1 (5.7–8.4)  | 28.3 (25.9–30.6) | 100 (100–100) |
| All                 | 40–54 | 2010 | 0.1 (0.1–0.1) | 0 (0–0)       | 1.1 (1.1–1.2)    | 1.2 (1.2–1.2)    | 6.4 (5.4–7.3)    | 1.2 (0.7–1.6)  | 92.5 (91.4–93.5) | 100 (100–100) |
| All                 | 40–54 | 2018 | 0 (0–0)       | 0 (0–0)       | 1.4 (1.3–1.4)    | 1.4 (1.3–1.5)    | 2.5 (1.9–3.1)    | 0.5 (0.3–0.8)  | 96.9 (96.3–97.6) | 100 (100–100) |
| All                 | 55–69 | 1995 | 1.6 (1.5–1.7) | 0.2 (0.2–0.2) | 0.6 (0.5–0.6)    | 2.4 (2.3–2.5)    | 68.1 (66.5–69.6) | 7.5 (6.7–8.4)  | 24.4 (23–25.8)   | 100 (100–100) |
| All                 | 55–69 | 2010 | 0.2 (0.2–0.3) | 0.1 (0.1–0.1) | 3.7 (3.6–3.8)    | 4 (3.9–4.1)      | 6.2 (5.6–6.7)    | 2.4 (2–2.7)    | 91.4 (90.8–92.1) | 100 (100–100) |
| All                 | 55–69 | 2018 | 0.1 (0.1–0.1) | 0 (0–0)       | 4.2 (4.1–4.3)    | 4.3 (4.2–4.4)    | 2.4 (2–2.7)      | 0.9 (0.7–1.1)  | 96.8 (96.4–97.2) | 100 (100–100) |
| All                 | 70–84 | 1995 | 3.9 (3.8–4)   | 0.4 (0.4–0.4) | 1.8 (1.7–1.9)    | 6.1 (5.9–6.3)    | 64 (62.8–65.3)   | 6.6 (6–7.2)    | 29.4 (28.2–30.5) | 100 (100–100) |
| All                 | 70–84 | 2010 | 0.6 (0.5–0.6) | 0.3 (0.2–0.3) | 10 (9.8–10.2)    | 10.8 (10.6–11)   | 5.1 (4.7–5.6)    | 2.5 (2.2–2.8)  | 92.3 (91.8–92.9) | 100 (100–100) |
| All                 | 70–84 | 2018 | 0.3 (0.3–0.3) | 0.1 (0.1–0.1) | 10.3 (10.2–10.5) | 10.7 (10.5–10.9) | 2.6 (2.3–2.9)    | 1.2 (1–1.4)    | 96.2 (95.8–96.5) | 100 (100–100) |
| All                 | +85   | 1995 | 6.9 (6.5–7.3) | 0.6 (0.4–0.7) | 3 (2.7–3.2)      | 10.4 (9.9–10.9)  | 66 (63.7–68.2)   | 5.4 (4.3–6.5)  | 28.7 (26.5–30.8) | 100 (100–100) |
| All                 | +85   | 2010 | 0.6 (0.4–0.7) | 0.4 (0.3–0.5) | 19.5 (18.9–20)   | 20.4 (19.8–21)   | 2.7 (2.2–3.3)    | 1.8 (1.4–2.2)  | 95.5 (94.8–96.2) | 100 (100–100) |

|                  |       |      |               |               |                  |                  |                  |                  |                  |               |
|------------------|-------|------|---------------|---------------|------------------|------------------|------------------|------------------|------------------|---------------|
| All              | +85   | 2018 | 0.4 (0.3–0.4) | 0.2 (0.2–0.3) | 20.8 (20.2–21.4) | 21.4 (20.8–22)   | 1.6 (1.2–2)      | 1.1 (0.8–1.5)    | 97.2 (96.7–97.7) | 100 (100–100) |
| Dementia         | 40–54 | 1995 | 0 (0–0)       | 0 (0–0)       | 0 (0–0)          | 0 (0–0)          | 65.2 (56.5–73.9) | 4.3 (0.6–8.1)    | 30.4 (22–38.8)   | 100 (100–100) |
| Dementia         | 40–54 | 2010 | 0 (0–0)       | 0 (0–0)       | 0 (0–0.1)        | 0.1 (0.1–0.1)    | 4.5 (0.7–8.4)    | 0 (0–0)          | 95.5 (91.6–99.3) | 100 (100–100) |
| Dementia         | 40–54 | 2018 | 0 (0–0)       | 0 (0–0)       | 0 (0–0.1)        | 0 (0–0)          | 0 (0–0)          | 0 (0–0)          | 100 (100–100)    | 100 (100–100) |
| Dementia         | 55–69 | 1995 | 0.2 (0.2–0.2) | 0 (0–0)       | 0.1 (0.1–0.1)    | 0.3 (0.3–0.3)    | 68.8 (64.2–73.5) | 3.9 (2–5.8)      | 27.3 (22.8–31.7) | 100 (100–100) |
| Dementia         | 55–69 | 2010 | 0 (0–0)       | 0 (0–0)       | 0.4 (0.3–0.4)    | 0.4 (0.4–0.4)    | 5.1 (3.4–6.7)    | 0.7 (0.1–1.4)    | 94.2 (92.5–95.9) | 100 (100–100) |
| Dementia         | 55–69 | 2018 | 0 (0–0)       | 0 (0–0)       | 0.4 (0.4–0.4)    | 0.4 (0.4–0.4)    | 0.8 (0.1–1.4)    | 0 (0–0)          | 99.2 (98.6–99.9) | 100 (100–100) |
| Dementia         | 70–84 | 1995 | 0.6 (0.5–0.6) | 0.1 (0–0.1)   | 0.5 (0.4–0.5)    | 1.1 (1–1.2)      | 51.1 (48.2–54.1) | 5.5 (4.1–6.8)    | 43.4 (40.4–46.3) | 100 (100–100) |
| Dementia         | 70–84 | 2010 | 0.1 (0.1–0.1) | 0 (0–0)       | 2.4 (2.3–2.6)    | 2.5 (2.4–2.6)    | 3.2 (2.5–3.9)    | 0.2 (0–0.4)      | 96.6 (95.8–97.3) | 100 (100–100) |
| Dementia         | 70–84 | 2018 | 0 (0–0)       | 0 (0–0)       | 2.5 (2.4–2.5)    | 2.5 (2.4–2.6)    | 1.3 (0.9–1.7)    | 0.2 (0–0.3)      | 98.5 (98.1–99)   | 100 (100–100) |
| Dementia         | +85   | 1995 | 2.1 (1.9–2.4) | 0.2 (0.1–0.2) | 1.4 (1.2–1.6)    | 3.7 (3.4–4)      | 58 (54–61.9)     | 4.2 (2.6–5.8)    | 37.8 (33.9–41.7) | 100 (100–100) |
| Dementia         | +85   | 2010 | 0.1 (0–0.1)   | 0 (0–0.1)     | 8.3 (7.9–8.7)    | 8.5 (8.1–8.9)    | 1 (0.5–1.5)      | 0.3 (0–0.6)      | 98.7 (98.1–99.3) | 100 (100–100) |
| Dementia         | +85   | 2018 | 0.1 (0–0.1)   | 0 (0–0)       | 8.4 (8–8.8)      | 8.4 (8–8.8)      | 1 (0.5–1.4)      | 0 (0–0)          | 99 (98.6–99.5)   | 100 (100–100) |
| Stroke           | 40–54 | 1995 | 0.4 (0.3–0.4) | 0 (0–0)       | 0.2 (0.1–0.2)    | 0.6 (0.6–0.6)    | 64.8 (62.2–67.3) | 7.3 (5.9–8.7)    | 28 (25.5–30.4)   | 100 (100–100) |
| Stroke           | 40–54 | 2010 | 0.1 (0.1–0.1) | 0 (0–0)       | 1.1 (1–1.1)      | 1.2 (1.2–1.2)    | 6.4 (5.5–7.4)    | 1.2 (0.8–1.6)    | 92.4 (91.3–93.4) | 100 (100–100) |
| Stroke           | 40–54 | 2018 | 0 (0–0)       | 0 (0–0)       | 1.3 (1.3–1.4)    | 1.4 (1.3–1.5)    | 2.6 (2–3.2)      | 0.6 (0.3–0.8)    | 96.9 (96.2–97.5) | 100 (100–100) |
| Stroke           | 55–69 | 1995 | 1.5 (1.4–1.5) | 0.2 (0.1–0.2) | 0.5 (0.5–0.6)    | 2.1 (2–2.2)      | 68 (66.4–69.6)   | 7.5 (6.6–8.4)    | 24.5 (23–25.9)   | 100 (100–100) |
| Stroke           | 55–69 | 2010 | 0.2 (0.2–0.3) | 0.1 (0.1–0.1) | 3.4 (3.3–3.5)    | 3.7 (3.6–3.8)    | 6.2 (5.7–6.8)    | 2.4 (2.1–2.8)    | 91.3 (90.7–92)   | 100 (100–100) |
| Stroke           | 55–69 | 2018 | 0.1 (0.1–0.1) | 0 (0–0)       | 3.9 (3.8–4)      | 4 (3.9–4.1)      | 2.6 (2.2–3)      | 0.9 (0.7–1.1)    | 96.5 (96.1–96.9) | 100 (100–100) |
| Stroke           | 70–84 | 1995 | 3.4 (3.3–3.5) | 0.3 (0.3–0.3) | 1.4 (1.3–1.5)    | 5.1 (5–5.2)      | 66.9 (65.6–68.2) | 6 (5.3–6.7)      | 27.1 (25.9–28.3) | 100 (100–100) |
| Stroke           | 70–84 | 2010 | 0.5 (0.5–0.6) | 0.2 (0.2–0.3) | 8.1 (7.9–8.3)    | 8.9 (8.7–9.1)    | 5.7 (5.2–6.2)    | 2.7 (2.4–3.1)    | 91.6 (90.9–92.2) | 100 (100–100) |
| Stroke           | 70–84 | 2018 | 0.3 (0.2–0.3) | 0.1 (0.1–0.1) | 8.4 (8.2–8.5)    | 8.7 (8.5–8.9)    | 3.1 (2.7–3.4)    | 1.2 (1–1.5)      | 95.7 (95.3–96.1) | 100 (100–100) |
| Stroke           | +85   | 1995 | 5 (4.7–5.3)   | 0.3 (0.3–0.4) | 1.8 (1.6–2)      | 7.1 (6.7–7.5)    | 70 (67.4–72.6)   | 4.8 (3.5–6)      | 25.2 (22.7–27.7) | 100 (100–100) |
| Stroke           | +85   | 2010 | 0.5 (0.4–0.6) | 0.3 (0.2–0.4) | 12.8 (12.3–13.3) | 13.6 (13.1–14.1) | 3.9 (3.1–4.7)    | 2.2 (1.7–2.8)    | 93.9 (92.9–94.8) | 100 (100–100) |
| Stroke           | +85   | 2018 | 0.3 (0.2–0.4) | 0.2 (0.1–0.3) | 14 (13.5–14.5)   | 14.6 (14.1–15.1) | 2.2 (1.7–2.8)    | 1.3 (0.9–1.7)    | 96.5 (95.8–97.2) | 100 (100–100) |
| <b>Pulmonary</b> |       |      |               |               |                  |                  |                  |                  |                  |               |
| CPD              | 40–54 | 1995 | 0.7 (0.7–0.8) | 0.2 (0.1–0.2) | 0.4 (0.4–0.4)    | 1.3 (1.3–1.3)    | 56.1 (54.3–57.9) | 12.2 (11–13.4)   | 31.7 (30.1–33.4) | 100 (100–100) |
| CPD              | 40–54 | 2010 | 0.4 (0.4–0.4) | 0.2 (0.2–0.3) | 3 (3–3.1)        | 3.7 (3.6–3.8)    | 10.4 (9.8–11.1)  | 6.6 (6.1–7.2)    | 82.9 (82.1–83.8) | 100 (100–100) |
| CPD              | 40–54 | 2018 | 0.6 (0.5–0.6) | 0.3 (0.3–0.4) | 4.5 (4.4–4.5)    | 5.4 (5.3–5.5)    | 10.8 (10.2–11.4) | 6.4 (5.9–6.8)    | 82.8 (82.1–83.5) | 100 (100–100) |
| CPD              | 55–69 | 1995 | 2 (1.9–2)     | 0.6 (0.6–0.7) | 1.1 (1–1.1)      | 3.7 (3.6–3.8)    | 53.5 (52.2–54.8) | 17.1 (16.2–18.1) | 29.3 (28.1–30.5) | 100 (100–100) |
| CPD              | 55–69 | 2010 | 0.3 (0.3–0.4) | 0.4 (0.4–0.4) | 5.1 (5–5.2)      | 5.8 (5.7–5.9)    | 5.9 (5.5–6.4)    | 6.6 (6.1–7.1)    | 87.5 (86.9–88.1) | 100 (100–100) |
| CPD              | 55–69 | 2018 | 0.3 (0.2–0.3) | 0.3 (0.3–0.4) | 7.2 (7.1–7.3)    | 7.8 (7.7–7.9)    | 3.5 (3.2–3.8)    | 4.2 (3.9–4.6)    | 92.3 (91.9–92.8) | 100 (100–100) |
| CPD              | 70–84 | 1995 | 3.3 (3.1–3.4) | 1.2 (1.1–1.2) | 1.4 (1.3–1.5)    | 5.8 (5.7–5.9)    | 55.8 (54.5–57.1) | 20 (18.9–21)     | 24.2 (23.1–25.4) | 100 (100–100) |
| CPD              | 70–84 | 2010 | 0.5 (0.5–0.6) | 0.8 (0.7–0.8) | 9.1 (9–9.3)      | 10.4 (10.2–10.6) | 5.1 (4.6–5.5)    | 7.2 (6.7–7.8)    | 87.7 (87–88.4)   | 100 (100–100) |
| CPD              | 70–84 | 2018 | 0.3 (0.3–0.3) | 0.5 (0.4–0.5) | 10.9 (10.7–11.1) | 11.7 (11.5–11.9) | 2.6 (2.3–2.9)    | 4.2 (3.9–4.6)    | 93.2 (92.7–93.6) | 100 (100–100) |
| CPD              | +85   | 1995 | 3.5 (3.2–3.7) | 0.6 (0.5–0.7) | 0.8 (0.7–0.9)    | 4.9 (4.6–5.2)    | 70.7 (67.5–73.9) | 12.7 (10.4–15.1) | 16.6 (14–19.2)   | 100 (100–100) |
| CPD              | +85   | 2010 | 0.6 (0.4–0.7) | 0.8 (0.7–0.9) | 7.9 (7.5–8.3)    | 9.2 (8.8–9.6)    | 6 (4.9–7.2)      | 8.8 (7.4–10.1)   | 85.2 (83.5–86.9) | 100 (100–100) |
| CPD              | +85   | 2018 | 0.4 (0.3–0.4) | 0.6 (0.5–0.8) | 11.9 (11.4–12.4) | 12.9 (12.4–13.4) | 2.7 (2.1–3.4)    | 5 (4.1–5.9)      | 92.3 (91.2–93.3) | 100 (100–100) |
| <b>Rheumatic</b> |       |      |               |               |                  |                  |                  |                  |                  |               |
| All              | 40–54 | 1995 | 0.2 (0.2–0.2) | 0.1 (0.1–0.2) | 0.2 (0.2–0.2)    | 0.5 (0.5–0.5)    | 36.4 (33.6–39.1) | 28.6 (26–31.2)   | 35.1 (32.3–37.8) | 100 (100–100) |
| All              | 40–54 | 2010 | 0 (0–0)       | 0.1 (0.1–0.1) | 0.9 (0.9–1)      | 1.1 (1.1–1.1)    | 3.1 (2.4–3.8)    | 7.3 (6.2–8.4)    | 89.6 (88.3–90.9) | 100 (100–100) |
| All              | 40–54 | 2018 | 0 (0–0)       | 0 (0–0)       | 1.4 (1.4–1.5)    | 1.5 (1.4–1.6)    | 1 (0.7–1.4)      | 2.5 (2–3.1)      | 96.4 (95.8–97.1) | 100 (100–100) |
| All              | 55–69 | 1995 | 0.4 (0.3–0.4) | 0.3 (0.3–0.4) | 0.3 (0.2–0.3)    | 1 (0.9–1.1)      | 39.1 (36.6–41.6) | 34.7 (32.3–37.1) | 26.2 (23.9–28.4) | 100 (100–100) |
| All              | 55–69 | 2010 | 0.1 (0.1–0.1) | 0.2 (0.2–0.2) | 1.4 (1.4–1.5)    | 1.7 (1.6–1.8)    | 5 (4.3–5.8)      | 10.7 (9.6–11.8)  | 84.2 (82.9–85.5) | 100 (100–100) |
| All              | 55–69 | 2018 | 0 (0–0.1)     | 0.1 (0.1–0.2) | 2.1 (2–2.2)      | 2.3 (2.2–2.4)    | 2 (1.6–2.5)      | 6 (5.3–6.8)      | 91.9 (91.1–92.8) | 100 (100–100) |
| All              | 70–84 | 1995 | 0.6 (0.6–0.7) | 0.4 (0.4–0.5) | 0.3 (0.2–0.3)    | 1.3 (1.2–1.4)    | 48.4 (45.7–51.2) | 31.2 (28.7–33.8) | 20.3 (18.1–22.5) | 100 (100–100) |



|                     |       |      |               |               |               |               |                  |                  |                  |               |
|---------------------|-------|------|---------------|---------------|---------------|---------------|------------------|------------------|------------------|---------------|
| All                 | 70–84 | 2010 | 0.1 (0.1–0.2) | 0.3 (0.3–0.4) | 1.7 (1.6–1.8) | 2.1 (2–2.2)   | 5.9 (4.9–7)      | 15.9 (14.3–17.6) | 78.1 (76.2–80)   | 100 (100–100) |
| All                 | 70–84 | 2018 | 0.1 (0.1–0.1) | 0.2 (0.2–0.3) | 2.4 (2.3–2.5) | 2.7 (2.6–2.8) | 3.5 (2.9–4.2)    | 8.2 (7.2–9.2)    | 88.2 (87.1–89.4) | 100 (100–100) |
| All                 | +85   | 1995 | 0.8 (0.7–1)   | 0.2 (0.1–0.3) | 0.1 (0–0.1)   | 1.1 (0.9–1.3) | 75 (68.7–81.3)   | 16.7 (11.2–22.1) | 8.3 (4.3–12.4)   | 100 (100–100) |
| All                 | +85   | 2010 | 0.2 (0.2–0.3) | 0.3 (0.2–0.4) | 1.5 (1.4–1.7) | 2.1 (1.9–2.3) | 10.8 (7.6–14)    | 14.9 (11.2–18.5) | 74.3 (69.9–78.8) | 100 (100–100) |
| All                 | +85   | 2018 | 0.2 (0.1–0.2) | 0.2 (0.1–0.3) | 2 (1.8–2.2)   | 2.4 (2.2–2.6) | 6.7 (4.4–9.1)    | 9 (6.3–11.6)     | 84.3 (80.9–87.7) | 100 (100–100) |
| Psoriatic arthritis | 40–54 | 1995 | 0 (0–0)       | 0 (0–0)       | 0 (0–0)       | 0.1 (0.1–0.1) | 41.7 (34.5–48.9) | 16.7 (11.2–22.1) | 41.7 (34.5–48.9) | 100 (100–100) |
| Psoriatic arthritis | 40–54 | 2010 | 0 (0–0)       | 0 (0–0)       | 0.3 (0.2–0.3) | 0.3 (0.3–0.3) | 2.5 (1.3–3.8)    | 2.5 (1.3–3.8)    | 95 (93.2–96.7)   | 100 (100–100) |
| Psoriatic arthritis | 40–54 | 2018 | 0 (0–0)       | 0 (0–0)       | 0.4 (0.4–0.5) | 0.5 (0.5–0.5) | 0.6 (0.1–1)      | 0.6 (0.1–1)      | 98.9 (98.2–99.6) | 100 (100–100) |
| Psoriatic arthritis | 55–69 | 1995 | 0 (0–0)       | 0 (0–0)       | 0 (0–0)       | 0.1 (0.1–0.1) | 44 (35.3–52.7)   | 20 (13–27)       | 36 (27.6–44.4)   | 100 (100–100) |
| Psoriatic arthritis | 55–69 | 2010 | 0 (0–0)       | 0 (0–0)       | 0.3 (0.3–0.4) | 0.4 (0.4–0.4) | 4.4 (2.8–5.9)    | 5.1 (3.5–6.8)    | 90.5 (88.3–92.7) | 100 (100–100) |
| Psoriatic arthritis | 55–69 | 2018 | 0 (0–0)       | 0 (0–0)       | 0.6 (0.6–0.6) | 0.6 (0.6–0.6) | 0.9 (0.4–1.5)    | 3.2 (2.2–4.3)    | 95.8 (94.6–97)   | 100 (100–100) |
| Psoriatic arthritis | 70–84 | 1995 | 0.1 (0–0.1)   | 0 (0–0)       | 0 (0–0)       | 0.1 (0.1–0.1) | 62.5 (51.9–73.1) | 12.5 (5.3–19.7)  | 25 (15.5–34.5)   | 100 (100–100) |
| Psoriatic arthritis | 70–84 | 2010 | 0 (0–0)       | 0 (0–0)       | 0.2 (0.2–0.2) | 0.2 (0.2–0.2) | 7.5 (3.8–11.2)   | 10 (5.8–14.2)    | 82.5 (77.2–87.8) | 100 (100–100) |
| Psoriatic arthritis | 70–84 | 2018 | 0 (0–0)       | 0 (0–0)       | 0.4 (0.4–0.5) | 0.5 (0.5–0.5) | 2.8 (1.4–4.2)    | 5.6 (3.6–7.5)    | 91.7 (89.3–94)   | 100 (100–100) |
| Psoriatic arthritis | +85   | 1995 | 0 (0–0.1)     | 0 (0–0)       | 0 (0–0)       | 0 (0–0)       | 100 (100–100)    | 0 (0–0)          | 0 (0–0)          | 100 (100–100) |
| Psoriatic arthritis | +85   | 2010 | 0 (0–0.1)     | 0 (0–0.1)     | 0.1 (0.1–0.2) | 0.2 (0.1–0.3) | 14.3 (2.7–25.9)  | 14.3 (2.7–25.9)  | 71.4 (56.5–86.4) | 100 (100–100) |
| Psoriatic arthritis | +85   | 2018 | 0 (0–0.1)     | 0 (0–0.1)     | 0.2 (0.1–0.3) | 0.2 (0.1–0.3) | 11.1 (1.9–20.3)  | 11.1 (1.9–20.3)  | 77.8 (65.6–89.9) | 100 (100–100) |
| Rheumatic arthritis | 40–54 | 1995 | 0.1 (0.1–0.1) | 0.1 (0.1–0.1) | 0.1 (0.1–0.1) | 0.3 (0.3–0.3) | 35.5 (31.9–39.1) | 30.4 (27–33.9)   | 34.1 (30.5–37.6) | 100 (100–100) |
| Rheumatic arthritis | 40–54 | 2010 | 0 (0–0)       | 0 (0–0)       | 0.4 (0.4–0.5) | 0.5 (0.5–0.5) | 4.7 (3.4–6)      | 7 (5.5–8.6)      | 88.3 (86.3–90.2) | 100 (100–100) |
| Rheumatic arthritis | 40–54 | 2018 | 0 (0–0)       | 0 (0–0)       | 0.5 (0.5–0.6) | 0.6 (0.6–0.6) | 1.8 (1–2.5)      | 3.1 (2.1–4.1)    | 95.2 (93.9–96.4) | 100 (100–100) |
| Rheumatic arthritis | 55–69 | 1995 | 0.3 (0.3–0.3) | 0.3 (0.3–0.3) | 0.2 (0.2–0.2) | 0.8 (0.8–0.8) | 38.3 (35.5–41)   | 36.6 (33.9–39.3) | 25.1 (22.7–27.5) | 100 (100–100) |
| Rheumatic arthritis | 55–69 | 2010 | 0 (0–0.1)     | 0.1 (0.1–0.1) | 0.9 (0.8–0.9) | 1.1 (1.1–1.1) | 4.4 (3.5–5.3)    | 11.2 (9.8–12.6)  | 84.4 (82.8–86)   | 100 (100–100) |
| Rheumatic arthritis | 55–69 | 2018 | 0 (0–0)       | 0.1 (0.1–0.1) | 1.2 (1.1–1.2) | 1.3 (1.2–1.4) | 2.3 (1.7–3)      | 5.6 (4.6–6.6)    | 92.1 (91–93.2)   | 100 (100–100) |
| Rheumatic arthritis | 70–84 | 1995 | 0.6 (0.5–0.6) | 0.4 (0.4–0.4) | 0.2 (0.2–0.3) | 1.2 (1.1–1.3) | 47.4 (44.5–50.3) | 33.2 (30.5–35.9) | 19.4 (17.1–21.7) | 100 (100–100) |
| Rheumatic arthritis | 70–84 | 2010 | 0.1 (0.1–0.1) | 0.3 (0.3–0.3) | 1.4 (1.3–1.4) | 1.7 (1.6–1.8) | 5.6 (4.5–6.8)    | 16.6 (14.7–18.4) | 77.8 (75.7–79.9) | 100 (100–100) |
| Rheumatic arthritis | 70–84 | 2018 | 0.1 (0–0.1)   | 0.2 (0.1–0.2) | 1.7 (1.6–1.8) | 1.9 (1.8–2)   | 3.3 (2.6–4.1)    | 8.1 (7–9.3)      | 88.5 (87.1–89.9) | 100 (100–100) |
| Rheumatic arthritis | +85   | 1995 | 0.8 (0.7–0.9) | 0.2 (0.1–0.3) | 0.1 (0–0.1)   | 1.1 (0.9–1.3) | 74.3 (67.8–80.8) | 17.1 (11.6–22.7) | 8.6 (4.4–12.7)   | 100 (100–100) |
| Rheumatic arthritis | +85   | 2010 | 0.2 (0.2–0.3) | 0.3 (0.2–0.4) | 1.3 (1.1–1.5) | 1.8 (1.6–2)   | 12.1 (8.6–15.6)  | 16.7 (12.6–20.7) | 71.2 (66.3–76.1) | 100 (100–100) |
| Rheumatic arthritis | +85   | 2018 | 0.1 (0.1–0.2) | 0.2 (0.1–0.2) | 1.7 (1.5–1.9) | 1.9 (1.7–2.1) | 5.6 (3.2–7.9)    | 8.3 (5.5–11.2)   | 86.1 (82.5–89.7) | 100 (100–100) |
| SLE                 | 40–54 | 1995 | 0 (0–0)       | 0 (0–0)       | 0 (0–0)       | 0.1 (0.1–0.1) | 32 (23.8–40.2)   | 28 (20.1–35.9)   | 40 (31.4–48.6)   | 100 (100–100) |
| SLE                 | 40–54 | 2010 | 0 (0–0)       | 0 (0–0)       | 0.1 (0.1–0.1) | 0.1 (0.1–0.1) | 5.6 (2.2–8.9)    | 16.7 (11.2–22.1) | 77.8 (71.7–83.9) | 100 (100–100) |
| SLE                 | 40–54 | 2018 | 0 (0–0)       | 0 (0–0)       | 0.1 (0.1–0.1) | 0.1 (0.1–0.1) | 4.5 (1.8–7.3)    | 9.1 (5.3–12.9)   | 86.4 (81.8–90.9) | 100 (100–100) |
| SLE                 | 55–69 | 1995 | 0 (0–0)       | 0 (0–0)       | 0 (0–0)       | 0.1 (0.1–0.1) | 35.3 (25.1–45.5) | 29.4 (19.7–39.1) | 35.3 (25.1–45.5) | 100 (100–100) |
| SLE                 | 55–69 | 2010 | 0 (0–0)       | 0 (0–0)       | 0.1 (0.1–0.1) | 0.1 (0.1–0.1) | 8.1 (4.2–12)     | 18.9 (13.3–24.6) | 73 (66.6–79.4)   | 100 (100–100) |
| SLE                 | 55–69 | 2018 | 0 (0–0)       | 0 (0–0)       | 0.1 (0.1–0.1) | 0.1 (0.1–0.1) | 4.4 (1.8–7.1)    | 13.3 (8.9–17.8)  | 82.2 (77.2–87.2) | 100 (100–100) |
| SLE                 | 70–84 | 1995 | 0 (0–0)       | 0 (0–0)       | 0 (0–0)       | 0 (0–0)       | 50 (32.1–67.9)   | 16.7 (3.3–30)    | 33.3 (16.5–50.2) | 100 (100–100) |
| SLE                 | 70–84 | 2010 | 0 (0–0)       | 0 (0–0)       | 0.1 (0–0.1)   | 0.1 (0.1–0.1) | 9.1 (1.5–16.7)   | 9.1 (1.5–16.7)   | 81.8 (71.6–92)   | 100 (100–100) |
| SLE                 | 70–84 | 2018 | 0 (0–0)       | 0 (0–0)       | 0.1 (0.1–0.1) | 0.1 (0.1–0.1) | 4.5 (0.7–8.4)    | 9.1 (3.7–14.5)   | 86.4 (80–92.8)   | 100 (100–100) |
| SLE                 | +85   | 1995 | 0 (0–0)       | 0 (0–0)       | 0 (0–0)       | 0 (0–0)       | NaN (NaN–NaN)    | NaN (NaN–NaN)    | NaN (NaN–NaN)    | NaN (NaN–NaN) |
| SLE                 | +85   | 2010 | 0 (0–0)       | 0 (0–0)       | 0 (0–0.1)     | 0 (0–0)       | 0 (0–0)          | 0 (0–0)          | 100 (100–100)    | 100 (100–100) |
| SLE                 | +85   | 2018 | 0 (0–0)       | 0 (0–0)       | 0.1 (0–0.1)   | 0.1 (0.1–0.1) | 0 (0–0)          | 0 (0–0)          | 100 (100–100)    | 100 (100–100) |
| Spondylitis         | 40–54 | 1995 | 0 (0–0)       | 0 (0–0)       | 0 (0–0)       | 0.1 (0.1–0.1) | 43.6 (36.6–50.5) | 23.1 (17.2–29)   | 33.3 (26.7–39.9) | 100 (100–100) |
| Spondylitis         | 40–54 | 2010 | 0 (0–0)       | 0 (0–0)       | 0.2 (0.2–0.2) | 0.3 (0.3–0.3) | 2.8 (1.4–4.2)    | 6.5 (4.4–8.6)    | 90.7 (88.2–93.1) | 100 (100–100) |
| Spondylitis         | 40–54 | 2018 | 0 (0–0)       | 0 (0–0)       | 0.4 (0.4–0.5) | 0.4 (0.4–0.4) | 0.6 (0.1–1.1)    | 1.1 (0.4–1.8)    | 98.3 (97.5–99.2) | 100 (100–100) |
| Spondylitis         | 55–69 | 1995 | 0 (0–0)       | 0 (0–0)       | 0 (0–0)       | 0.1 (0.1–0.1) | 66.7 (56.9–76.4) | 11.1 (4.6–17.6)  | 22.2 (13.6–30.8) | 100 (100–100) |
| Spondylitis         | 55–69 | 2010 | 0 (0–0)       | 0 (0–0)       | 0.2 (0.2–0.2) | 0.2 (0.2–0.2) | 8.4 (5.8–11.1)   | 10.8 (7.9–13.8)  | 80.7 (76.9–84.5) | 100 (100–100) |

|                   |       |      |               |               |               |               |                  |                 |                  |               |
|-------------------|-------|------|---------------|---------------|---------------|---------------|------------------|-----------------|------------------|---------------|
| Spondylitis       | 55–69 | 2018 | 0 (0–0)       | 0 (0–0)       | 0.4 (0.3–0.4) | 0.4 (0.4–0.4) | 2.9 (1.7–4.2)    | 6.6 (4.7–8.4)   | 90.5 (88.3–92.7) | 100 (100–100) |
| Spondylitis       | 70–84 | 1995 | 0 (0–0)       | 0 (0–0)       | 0 (0–0)       | 0 (0–0)       | 57.1 (40.7–73.5) | 14.3 (2.7–25.9) | 28.6 (13.6–43.5) | 100 (100–100) |
| Spondylitis       | 70–84 | 2010 | 0 (0–0)       | 0 (0–0)       | 0.1 (0.1–0.2) | 0.2 (0.2–0.2) | 10.3 (5.4–15.3)  | 6.9 (2.8–11)    | 82.8 (76.6–88.9) | 100 (100–100) |
| Spondylitis       | 70–84 | 2018 | 0 (0–0)       | 0 (0–0)       | 0.3 (0.3–0.3) | 0.3 (0.3–0.3) | 6.8 (4.2–9.3)    | 8.1 (5.3–10.9)  | 85.1 (81.5–88.8) | 100 (100–100) |
| Spondylitis       | +85   | 1995 | 0 (0–0.1)     | 0 (0–0)       | 0 (0–0)       | 0 (0–0)       | 100 (100–100)    | 0 (0–0)         | 0 (0–0)          | 100 (100–100) |
| Spondylitis       | +85   | 2010 | 0 (0–0)       | 0 (0–0)       | 0.1 (0–0.1)   | 0.1 (0.1–0.1) | 0 (0–0)          | 0 (0–0)         | 100 (100–100)    | 100 (100–100) |
| Spondylitis       | +85   | 2018 | 0 (0–0.1)     | 0 (0–0)       | 0.2 (0.1–0.2) | 0.2 (0.1–0.3) | 14.3 (2.7–25.9)  | 0 (0–0)         | 85.7 (74.1–97.3) | 100 (100–100) |
| <b>Urogenital</b> |       |      |               |               |               |               |                  |                 |                  |               |
| All               | 40–54 | 1995 | 0.2 (0.2–0.3) | 0.1 (0.1–0.1) | 0.1 (0.1–0.1) | 0.4 (0.4–0.4) | 57.2 (54.1–60.3) | 17 (14.6–19.4)  | 25.8 (23–28.5)   | 100 (100–100) |
| All               | 40–54 | 2010 | 0.2 (0.2–0.2) | 0.1 (0–0.1)   | 0.9 (0.8–0.9) | 1.1 (1.1–1.1) | 19.1 (17.6–20.7) | 5.1 (4.2–6)     | 75.8 (74.1–77.5) | 100 (100–100) |
| All               | 40–54 | 2018 | 0.3 (0.3–0.3) | 0.1 (0.1–0.1) | 1.6 (1.5–1.6) | 1.9 (1.8–2)   | 14.8 (13.7–15.9) | 3.4 (2.8–3.9)   | 81.8 (80.6–83.1) | 100 (100–100) |
| All               | 55–69 | 1995 | 0.4 (0.4–0.4) | 0.1 (0.1–0.1) | 0.2 (0.2–0.2) | 0.7 (0.7–0.7) | 56 (53–58.9)     | 17 (14.7–19.2)  | 27.1 (24.4–29.7) | 100 (100–100) |
| All               | 55–69 | 2010 | 0.2 (0.1–0.2) | 0.1 (0.1–0.1) | 1.5 (1.4–1.5) | 1.7 (1.6–1.8) | 8.9 (7.9–9.9)    | 4.5 (3.7–5.2)   | 86.6 (85.4–87.8) | 100 (100–100) |
| All               | 55–69 | 2018 | 0.2 (0.1–0.2) | 0.1 (0.1–0.1) | 2.4 (2.3–2.5) | 2.6 (2.5–2.7) | 6.4 (5.7–7.1)    | 2.9 (2.4–3.3)   | 90.7 (89.9–91.6) | 100 (100–100) |
| All               | 70–84 | 1995 | 0.6 (0.5–0.6) | 0.1 (0.1–0.1) | 0.3 (0.3–0.4) | 1 (0.9–1.1)   | 58.1 (55–61.2)   | 8.6 (6.8–10.3)  | 33.3 (30.4–36.3) | 100 (100–100) |
| All               | 70–84 | 2010 | 0.2 (0.2–0.3) | 0.1 (0–0.1)   | 3 (2.9–3.1)   | 3.3 (3.2–3.4) | 6.7 (5.8–7.6)    | 1.8 (1.3–2.2)   | 91.6 (90.6–92.6) | 100 (100–100) |
| All               | 70–84 | 2018 | 0.1 (0.1–0.2) | 0.1 (0–0.1)   | 4.9 (4.8–5)   | 5.1 (5–5.2)   | 2.9 (2.5–3.4)    | 1.2 (1–1.5)     | 95.8 (95.3–96.3) | 100 (100–100) |
| All               | +85   | 1995 | 0.8 (0.6–0.9) | 0 (0–0.1)     | 0.4 (0.3–0.5) | 1.2 (1–1.4)   | 62.5 (55.8–69.2) | 2.5 (0.3–4.7)   | 35 (28.4–41.6)   | 100 (100–100) |
| All               | +85   | 2010 | 0.3 (0.2–0.3) | 0.1 (0–0.1)   | 4.1 (3.8–4.4) | 4.4 (4.1–4.7) | 5.7 (4.1–7.3)    | 1.3 (0.5–2)     | 93.1 (91.3–94.8) | 100 (100–100) |
| All               | +85   | 2018 | 0.2 (0.1–0.2) | 0.1 (0–0.1)   | 7.3 (6.9–7.7) | 7.5 (7.1–7.9) | 2.2 (1.4–2.9)    | 0.7 (0.3–1.2)   | 97.1 (96.3–98)   | 100 (100–100) |
| Pyelonephritis    | 40–54 | 1995 | 0.1 (0.1–0.1) | 0 (0–0)       | 0 (0–0)       | 0.1 (0.1–0.1) | 72.3 (67.4–77.2) | 1.5 (0.2–2.9)   | 26.2 (21.4–30.9) | 100 (100–100) |
| Pyelonephritis    | 40–54 | 2010 | 0.1 (0.1–0.1) | 0 (0–0)       | 0.4 (0.4–0.4) | 0.5 (0.5–0.5) | 23.6 (21.2–26)   | 2.1 (1.3–3)     | 74.2 (71.7–76.8) | 100 (100–100) |
| Pyelonephritis    | 40–54 | 2018 | 0.2 (0.2–0.2) | 0 (0–0)       | 0.8 (0.8–0.8) | 1 (1–1)       | 20.3 (18.6–22)   | 2.4 (1.8–3.1)   | 77.3 (75.5–79.1) | 100 (100–100) |
| Pyelonephritis    | 55–69 | 1995 | 0.2 (0.2–0.2) | 0 (0–0)       | 0.1 (0–0.1)   | 0.2 (0.2–0.2) | 74.3 (69.9–78.8) | 2.7 (1.1–4.4)   | 23 (18.7–27.3)   | 100 (100–100) |
| Pyelonephritis    | 55–69 | 2010 | 0.1 (0.1–0.1) | 0 (0–0)       | 0.5 (0.5–0.5) | 0.6 (0.6–0.6) | 13.3 (11.3–15.3) | 0.9 (0.4–1.5)   | 85.8 (83.7–87.9) | 100 (100–100) |
| Pyelonephritis    | 55–69 | 2018 | 0.1 (0.1–0.1) | 0 (0–0)       | 0.8 (0.8–0.8) | 0.9 (0.9–0.9) | 11.7 (10.1–13.3) | 1.3 (0.7–1.8)   | 87.1 (85.4–88.7) | 100 (100–100) |
| Pyelonephritis    | 70–84 | 1995 | 0.3 (0.2–0.3) | 0 (0–0)       | 0.1 (0.1–0.1) | 0.4 (0.4–0.4) | 68.5 (63.7–73.3) | 2.7 (1.1–4.4)   | 28.8 (24.1–33.4) | 100 (100–100) |
| Pyelonephritis    | 70–84 | 2010 | 0.1 (0.1–0.1) | 0 (0–0)       | 0.8 (0.7–0.8) | 0.9 (0.8–1)   | 13.5 (11.1–15.9) | 0.6 (0.1–1.2)   | 85.9 (83.5–88.3) | 100 (100–100) |
| Pyelonephritis    | 70–84 | 2018 | 0.1 (0.1–0.1) | 0 (0–0)       | 1.1 (1.1–1.2) | 1.2 (1.1–1.3) | 6.5 (5.1–7.8)    | 0.4 (0–0.7)     | 93.2 (91.8–94.5) | 100 (100–100) |
| Pyelonephritis    | +85   | 1995 | 0.4 (0.3–0.5) | 0 (0–0.1)     | 0.2 (0.1–0.2) | 0.6 (0.5–0.7) | 66.7 (56.9–76.4) | 5.6 (0.8–10.3)  | 27.8 (18.5–37)   | 100 (100–100) |
| Pyelonephritis    | +85   | 2010 | 0.1 (0.1–0.2) | 0 (0–0)       | 0.9 (0.8–1.1) | 1 (0.9–1.1)   | 10.8 (6.3–15.3)  | 0 (0–0)         | 89.2 (84.7–93.7) | 100 (100–100) |
| Pyelonephritis    | +85   | 2018 | 0.1 (0–0.1)   | 0 (0–0)       | 1.2 (1.1–1.4) | 1.3 (1.1–1.5) | 6.2 (3.2–9.3)    | 0 (0–0)         | 93.8 (90.7–96.8) | 100 (100–100) |
| Renal disease     | 40–54 | 1995 | 0.1 (0.1–0.2) | 0.1 (0.1–0.1) | 0.1 (0.1–0.1) | 0.3 (0.3–0.3) | 51.1 (47.4–54.8) | 21.9 (18.8–25)  | 27 (23.7–30.3)   | 100 (100–100) |
| Renal disease     | 40–54 | 2010 | 0.1 (0.1–0.1) | 0 (0–0.1)     | 0.5 (0.5–0.5) | 0.6 (0.6–0.6) | 15.6 (13.7–17.5) | 6.5 (5.2–7.8)   | 77.9 (75.7–80.1) | 100 (100–100) |
| Renal disease     | 40–54 | 2018 | 0.1 (0.1–0.1) | 0 (0–0)       | 0.9 (0.8–0.9) | 1 (1–1)       | 8.7 (7.4–9.9)    | 3.6 (2.8–4.4)   | 87.7 (86.3–89.2) | 100 (100–100) |
| Renal disease     | 55–69 | 1995 | 0.2 (0.2–0.3) | 0.1 (0.1–0.1) | 0.2 (0.1–0.2) | 0.5 (0.5–0.5) | 47.7 (44.2–51.3) | 21.9 (19–24.8)  | 30.3 (27.1–33.6) | 100 (100–100) |
| Renal disease     | 55–69 | 2010 | 0.1 (0.1–0.1) | 0.1 (0.1–0.1) | 1.1 (1–1.1)   | 1.2 (1.1–1.3) | 7 (6–8.1)        | 5.5 (4.5–6.4)   | 87.5 (86.1–88.9) | 100 (100–100) |
| Renal disease     | 55–69 | 2018 | 0.1 (0.1–0.1) | 0.1 (0–0.1)   | 1.7 (1.7–1.8) | 1.8 (1.7–1.9) | 3.9 (3.3–4.6)    | 3 (2.4–3.6)     | 93 (92.2–93.9)   | 100 (100–100) |
| Renal disease     | 70–84 | 1995 | 0.4 (0.3–0.4) | 0.1 (0.1–0.1) | 0.3 (0.2–0.3) | 0.7 (0.6–0.8) | 52.2 (48.5–56)   | 10.4 (8.1–12.8) | 37.3 (33.7–41)   | 100 (100–100) |
| Renal disease     | 70–84 | 2010 | 0.1 (0.1–0.1) | 0 (0–0.1)     | 2.4 (2.3–2.5) | 2.5 (2.4–2.6) | 4.4 (3.5–5.2)    | 1.8 (1.3–2.4)   | 93.8 (92.8–94.8) | 100 (100–100) |
| Renal disease     | 70–84 | 2018 | 0.1 (0.1–0.1) | 0 (0–0.1)     | 4 (3.9–4.1)   | 4.1 (4–4.2)   | 2.1 (1.7–2.5)    | 1.2 (0.9–1.5)   | 96.7 (96.2–97.2) | 100 (100–100) |
| Renal disease     | +85   | 1995 | 0.4 (0.3–0.5) | 0 (0–0.1)     | 0.3 (0.2–0.4) | 0.7 (0.6–0.8) | 54.2 (45.3–63.1) | 4.2 (0.6–7.7)   | 41.7 (32.8–50.5) | 100 (100–100) |
| Renal disease     | +85   | 2010 | 0.1 (0.1–0.2) | 0 (0–0.1)     | 3.3 (3.1–3.6) | 3.5 (3.2–3.8) | 4 (2.4–5.5)      | 0.8 (0.1–1.5)   | 95.2 (93.6–96.9) | 100 (100–100) |
| Renal disease     | +85   | 2018 | 0.1 (0.1–0.2) | 0 (0–0.1)     | 6.3 (6–6.7)   | 6.5 (6.1–6.9) | 1.7 (0.9–2.4)    | 0.4 (0.1–0.8)   | 97.9 (97.1–98.7) | 100 (100–100) |

**Abbreviations**

AMI, Acute myocardial infarction; CI, Confidence interval; CPD, Chronic pulmonary disease; IBD, Inflammatory bowel disease; ICD, International Classification of Diseases; PAD, Peripheral artery disease

**Table S4. Sex**

Proportion of persons with records of diagnoses identified by ICD-8, ICD-10, or both. For females and males by diseases and sample year.

| Disease               | Sex    | Year | Proportion of sample,% |                      |                    |                   | Proportion of diseased,% |                      |                    |                   |
|-----------------------|--------|------|------------------------|----------------------|--------------------|-------------------|--------------------------|----------------------|--------------------|-------------------|
|                       |        |      | ICD-8<br>(95% CI)      | ICD-8+10<br>(95% CI) | ICD-10<br>(95% CI) | Total<br>(95% CI) | ICD-8<br>(95% CI)        | ICD-8+10<br>(95% CI) | ICD-10<br>(95% CI) | Total<br>(95% CI) |
| <b>Cardiovascular</b> |        |      |                        |                      |                    |                   |                          |                      |                    |                   |
| All                   | Female | 1995 | 4.6 (4.5–4.6)          | 1.1 (1–1.1)          | 1.7 (1.7–1.8)      | 7.4 (7.3–7.5)     | 61.9 (61.2–62.5)         | 14.5 (14–15)         | 23.7 (23.1–24.3)   | 100 (100–100)     |
| All                   | Female | 2010 | 0.5 (0.5–0.5)          | 0.9 (0.9–1)          | 16.6 (16.5–16.8)   | 18.1 (18–18.2)    | 2.7 (2.5–2.8)            | 5.2 (5–5.4)          | 92.1 (91.8–92.3)   | 100 (100–100)     |
| All                   | Female | 2018 | 0.2 (0.2–0.2)          | 0.6 (0.5–0.6)        | 22.4 (22.2–22.5)   | 23.2 (23–23.4)    | 0.9 (0.8–0.9)            | 2.4 (2.3–2.6)        | 96.7 (96.6–96.8)   | 100 (100–100)     |
| All                   | Male   | 1995 | 5.9 (5.8–5.9)          | 1.6 (1.5–1.6)        | 2.2 (2.1–2.2)      | 9.6 (9.5–9.7)     | 61 (60.4–61.7)           | 16.4 (15.9–16.9)     | 22.5 (22–23.1)     | 100 (100–100)     |
| All                   | Male   | 2010 | 0.6 (0.5–0.6)          | 1.4 (1.4–1.5)        | 18 (17.8–18.1)     | 19.9 (19.7–20.1)  | 2.8 (2.7–2.9)            | 7.1 (6.9–7.3)        | 90.1 (89.8–90.4)   | 100 (100–100)     |
| All                   | Male   | 2018 | 0.2 (0.2–0.2)          | 0.8 (0.7–0.8)        | 24 (23.8–24.2)     | 25 (24.8–25.2)    | 0.8 (0.7–0.9)            | 3 (2.9–3.2)          | 96.2 (96–96.3)     | 100 (100–100)     |
| AMI                   | Female | 1995 | 1.2 (1.1–1.2)          | 0.1 (0.1–0.1)        | 0.3 (0.3–0.3)      | 1.6 (1.6–1.6)     | 75.4 (74.1–76.7)         | 5.5 (4.8–6.2)        | 19.1 (17.9–20.3)   | 100 (100–100)     |
| AMI                   | Female | 2010 | 0.2 (0.2–0.2)          | 0.1 (0–0.1)          | 1.8 (1.7–1.8)      | 2 (1.9–2.1)       | 8.6 (7.8–9.4)            | 2.9 (2.4–3.4)        | 88.5 (87.6–89.4)   | 100 (100–100)     |
| AMI                   | Female | 2018 | 0.1 (0.1–0.1)          | 0 (0–0)              | 1.9 (1.8–1.9)      | 2 (1.9–2.1)       | 3.1 (2.6–3.5)            | 1.3 (1–1.6)          | 95.6 (95.1–96.2)   | 100 (100–100)     |
| AMI                   | Male   | 1995 | 3 (2.9–3)              | 0.2 (0.2–0.2)        | 0.6 (0.6–0.7)      | 3.8 (3.7–3.9)     | 77.7 (76.9–78.6)         | 5.8 (5.4–6.3)        | 16.5 (15.7–17.2)   | 100 (100–100)     |
| AMI                   | Male   | 2010 | 0.5 (0.5–0.6)          | 0.3 (0.2–0.3)        | 3.8 (3.7–3.9)      | 4.6 (4.5–4.7)     | 11.8 (11.2–12.4)         | 5.5 (5.1–5.9)        | 82.7 (82–83.5)     | 100 (100–100)     |
| AMI                   | Male   | 2018 | 0.2 (0.2–0.2)          | 0.1 (0.1–0.1)        | 4.4 (4.3–4.5)      | 4.7 (4.6–4.8)     | 4.2 (3.8–4.6)            | 2.5 (2.2–2.7)        | 93.3 (92.9–93.8)   | 100 (100–100)     |
| Atrial fibrillation   | Female | 1995 | 0.8 (0.8–0.9)          | 0.2 (0.2–0.2)        | 0.4 (0.4–0.5)      | 1.5 (1.5–1.5)     | 57.7 (56.2–59.3)         | 12.5 (11.4–13.5)     | 29.8 (28.3–31.2)   | 100 (100–100)     |
| Atrial fibrillation   | Female | 2010 | 0 (0–0.1)              | 0.1 (0.1–0.1)        | 3.2 (3.1–3.2)      | 3.3 (3.2–3.4)     | 1.3 (1.1–1.5)            | 2.8 (2.4–3.1)        | 95.9 (95.5–96.3)   | 100 (100–100)     |
| Atrial fibrillation   | Female | 2018 | 0 (0–0)                | 0 (0–0)              | 4.3 (4.2–4.4)      | 4.4 (4.3–4.5)     | 0.4 (0.3–0.6)            | 0.8 (0.6–1)          | 98.8 (98.6–99)     | 100 (100–100)     |
| Atrial fibrillation   | Male   | 1995 | 0.9 (0.9–1)            | 0.3 (0.2–0.3)        | 0.5 (0.5–0.5)      | 1.7 (1.6–1.8)     | 54.2 (52.7–55.8)         | 15.7 (14.6–16.8)     | 30.1 (28.7–31.5)   | 100 (100–100)     |
| Atrial fibrillation   | Male   | 2010 | 0.1 (0.1–0.1)          | 0.2 (0.2–0.2)        | 4.3 (4.2–4.3)      | 4.5 (4.4–4.6)     | 1.5 (1.3–1.8)            | 4.1 (3.7–4.5)        | 94.4 (93.9–94.8)   | 100 (100–100)     |
| Atrial fibrillation   | Male   | 2018 | 0 (0–0)                | 0.1 (0.1–0.1)        | 6.2 (6.1–6.3)      | 6.4 (6.3–6.5)     | 0.4 (0.3–0.5)            | 1.7 (1.5–1.9)        | 97.9 (97.7–98.1)   | 100 (100–100)     |
| Dyslipidemia          | Female | 1995 | 0.2 (0.1–0.2)          | 0 (0–0)              | 0.1 (0.1–0.1)      | 0.3 (0.3–0.3)     | 51.5 (48.1–55)           | 8 (6.1–9.8)          | 40.5 (37.1–43.9)   | 100 (100–100)     |
| Dyslipidemia          | Female | 2010 | 0 (0–0.1)              | 0 (0–0.1)            | 3.8 (3.8–3.9)      | 3.9 (3.8–4)       | 1.1 (0.9–1.3)            | 1.1 (0.9–1.3)        | 97.8 (97.5–98.1)   | 100 (100–100)     |
| Dyslipidemia          | Female | 2018 | 0 (0–0)                | 0 (0–0)              | 6.1 (6–6.2)        | 6.1 (6–6.2)       | 0.3 (0.3–0.4)            | 0.5 (0.4–0.6)        | 99.1 (99–99.3)     | 100 (100–100)     |
| Dyslipidemia          | Male   | 1995 | 0.3 (0.3–0.3)          | 0.1 (0–0.1)          | 0.2 (0.2–0.3)      | 0.6 (0.6–0.6)     | 49.3 (46.6–51.9)         | 9 (7.4–10.5)         | 41.8 (39.2–44.4)   | 100 (100–100)     |
| Dyslipidemia          | Male   | 2010 | 0.1 (0.1–0.1)          | 0.1 (0.1–0.1)        | 5.6 (5.5–5.7)      | 5.8 (5.7–5.9)     | 1.2 (1.1–1.4)            | 1.6 (1.4–1.8)        | 97.2 (96.9–97.4)   | 100 (100–100)     |
| Dyslipidemia          | Male   | 2018 | 0 (0–0)                | 0.1 (0.1–0.1)        | 8 (7.9–8.1)        | 8 (8–8.2)         | 0.5 (0.4–0.6)            | 0.8 (0.7–0.9)        | 98.8 (98.6–98.9)   | 100 (100–100)     |
| Heart failure         | Female | 1995 | 0.9 (0.9–0.9)          | 0.2 (0.2–0.2)        | 0.5 (0.5–0.6)      | 1.6 (1.6–1.6)     | 56.2 (54.7–57.7)         | 10.6 (9.7–11.5)      | 33.2 (31.8–34.6)   | 100 (100–100)     |
| Heart failure         | Female | 2010 | 0.1 (0–0.1)            | 0 (0–0)              | 1.9 (1.8–1.9)      | 2 (1.9–2.1)       | 2.7 (2.2–3.1)            | 1.4 (1.1–1.7)        | 95.9 (95.4–96.5)   | 100 (100–100)     |
| Heart failure         | Female | 2018 | 0 (0–0)                | 0 (0–0)              | 1.9 (1.9–2)        | 2 (1.9–2.1)       | 1 (0.7–1.3)              | 0.4 (0.2–0.6)        | 98.6 (98.3–98.9)   | 100 (100–100)     |
| Heart failure         | Male   | 1995 | 0.9 (0.9–0.9)          | 0.2 (0.2–0.3)        | 0.6 (0.6–0.7)      | 1.8 (1.7–1.9)     | 51.2 (49.7–52.8)         | 13 (12–14.1)         | 35.7 (34.3–37.2)   | 100 (100–100)     |
| Heart failure         | Male   | 2010 | 0.1 (0–0.1)            | 0 (0–0)              | 2.8 (2.7–2.8)      | 2.8 (2.7–2.9)     | 1.9 (1.6–2.2)            | 1.4 (1.2–1.7)        | 96.7 (96.3–97.1)   | 100 (100–100)     |
| Heart failure         | Male   | 2018 | 0 (0–0)                | 0 (0–0)              | 3.3 (3.2–3.3)      | 3.3 (3.2–3.4)     | 0.6 (0.5–0.8)            | 0.4 (0.3–0.6)        | 98.9 (98.7–99.2)   | 100 (100–100)     |
| Hypertension          | Female | 1995 | 2.1 (2.1–2.2)          | 0.3 (0.2–0.3)        | 0.7 (0.7–0.7)      | 3.1 (3–3.2)       | 68.9 (67.9–69.9)         | 8.5 (7.8–9.1)        | 22.6 (21.7–23.5)   | 100 (100–100)     |
| Hypertension          | Female | 2010 | 0.3 (0.3–0.3)          | 0.5 (0.5–0.5)        | 11.9 (11.8–12)     | 12.7 (12.6–12.8)  | 2.4 (2.3–2.6)            | 3.8 (3.6–4)          | 93.7 (93.5–94)     | 100 (100–100)     |
| Hypertension          | Female | 2018 | 0.1 (0.1–0.1)          | 0.3 (0.3–0.4)        | 16.8 (16.7–17)     | 17.3 (17.2–17.4)  | 0.7 (0.6–0.8)            | 1.9 (1.8–2.1)        | 97.4 (97.2–97.5)   | 100 (100–100)     |
| Hypertension          | Male   | 1995 | 1.9 (1.9–2)            | 0.3 (0.3–0.3)        | 0.7 (0.7–0.8)      | 2.9 (2.8–3)       | 65.1 (64–66.3)           | 9.5 (8.8–10.2)       | 25.3 (24.3–26.4)   | 100 (100–100)     |
| Hypertension          | Male   | 2010 | 0.2 (0.2–0.3)          | 0.4 (0.4–0.5)        | 10.9 (10.8–11.1)   | 11.6 (11.5–11.7)  | 2.1 (2–2.3)              | 3.8 (3.6–4.1)        | 94 (93.7–94.3)     | 100 (100–100)     |
| Hypertension          | Male   | 2018 | 0.1 (0.1–0.1)          | 0.3 (0.2–0.3)        | 15.7 (15.5–15.8)   | 16.1 (16–16.2)    | 0.6 (0.5–0.7)            | 1.6 (1.5–1.8)        | 97.7 (97.6–97.9)   | 100 (100–100)     |
| PAD                   | Female | 1995 | 0.8 (0.8–0.8)          | 0.2 (0.2–0.2)        | 0.4 (0.4–0.4)      | 1.4 (1.4–1.4)     | 59.7 (58.1–61.3)         | 12.3 (11.2–13.4)     | 28 (26.5–29.5)     | 100 (100–100)     |

|                         |        |      |               |               |                  |                  |                  |                  |                  |               |
|-------------------------|--------|------|---------------|---------------|------------------|------------------|------------------|------------------|------------------|---------------|
| PAD                     | Female | 2010 | 0.2 (0.1–0.2) | 0.1 (0.1–0.1) | 2.3 (2.2–2.3)    | 2.5 (2.4–2.6)    | 6.2 (5.7–6.8)    | 3.7 (3.2–4.2)    | 90 (89.3–90.8)   | 100 (100–100) |
| PAD                     | Female | 2018 | 0.1 (0.1–0.1) | 0 (0–0.1)     | 2.8 (2.8–2.9)    | 3 (2.9–3.1)      | 3.2 (2.8–3.5)    | 1.6 (1.3–1.9)    | 95.3 (94.8–95.7) | 100 (100–100) |
| PAD                     | Male   | 1995 | 1 (1–1)       | 0.3 (0.3–0.3) | 0.5 (0.5–0.5)    | 1.8 (1.7–1.9)    | 56.4 (54.9–57.9) | 15.8 (14.7–16.9) | 27.8 (26.5–29.2) | 100 (100–100) |
| PAD                     | Male   | 2010 | 0.1 (0.1–0.1) | 0.1 (0.1–0.1) | 3 (2.9–3.1)      | 3.2 (3.1–3.3)    | 3.8 (3.4–4.2)    | 3.5 (3.1–3.9)    | 92.7 (92.1–93.3) | 100 (100–100) |
| PAD                     | Male   | 2018 | 0.1 (0.1–0.1) | 0 (0–0.1)     | 3.9 (3.8–4)      | 4 (3.9–4.1)      | 1.6 (1.3–1.8)    | 1.1 (0.9–1.3)    | 97.3 (97–97.6)   | 100 (100–100) |
| <b>Endocrine</b>        |        |      |               |               |                  |                  |                  |                  |                  |               |
| Diabetes mellitus       | Female | 1995 | 1.2 (1.2–1.2) | 0.4 (0.4–0.5) | 0.4 (0.3–0.4)    | 2 (1.9–2.1)      | 60.4 (59.1–61.7) | 21.6 (20.5–22.7) | 18 (17–19)       | 100 (100–100) |
| Diabetes mellitus       | Female | 2010 | 0.2 (0.1–0.2) | 0.5 (0.4–0.5) | 3.4 (3.3–3.5)    | 4 (3.9–4.1)      | 3.9 (3.5–4.3)    | 11.4 (10.8–12)   | 84.7 (84–85.4)   | 100 (100–100) |
| Diabetes mellitus       | Female | 2018 | 0.1 (0.1–0.1) | 0.3 (0.3–0.4) | 4.5 (4.4–4.6)    | 4.9 (4.8–5)      | 2 (1.7–2.2)      | 7.1 (6.7–7.5)    | 90.9 (90.4–91.4) | 100 (100–100) |
| Diabetes mellitus       | Male   | 1995 | 1.4 (1.3–1.4) | 0.5 (0.5–0.6) | 0.5 (0.5–0.5)    | 2.4 (2.3–2.5)    | 57.8 (56.5–59.1) | 22 (20.9–23.1)   | 20.2 (19.1–21.2) | 100 (100–100) |
| Diabetes mellitus       | Male   | 2010 | 0.2 (0.1–0.2) | 0.5 (0.5–0.6) | 4.5 (4.4–4.6)    | 5.2 (5.1–5.3)    | 3.1 (2.8–3.4)    | 10.3 (9.8–10.8)  | 86.6 (86–87.2)   | 100 (100–100) |
| Diabetes mellitus       | Male   | 2018 | 0.1 (0.1–0.1) | 0.4 (0.4–0.4) | 6 (5.9–6.1)      | 6.5 (6.4–6.6)    | 1.4 (1.2–1.5)    | 6 (5.7–6.4)      | 92.6 (92.2–93)   | 100 (100–100) |
| <b>Fractures</b>        |        |      |               |               |                  |                  |                  |                  |                  |               |
| All                     | Female | 1995 | 4.1 (4–4.2)   | 0.6 (0.6–0.7) | 2.1 (2.1–2.2)    | 6.8 (6.7–6.9)    | 59.8 (59.1–60.5) | 9.1 (8.7–9.5)    | 31.1 (30.4–31.8) | 100 (100–100) |
| All                     | Female | 2010 | 1.2 (1.2–1.2) | 0.6 (0.6–0.7) | 14.3 (14.2–14.4) | 16.2 (16.1–16.3) | 7.4 (7.2–7.7)    | 4 (3.8–4.2)      | 88.6 (88.3–88.9) | 100 (100–100) |
| All                     | Female | 2018 | 1.3 (1.3–1.3) | 0.5 (0.5–0.6) | 18.4 (18.2–18.5) | 20.2 (20–20.4)   | 6.5 (6.3–6.7)    | 2.7 (2.6–2.8)    | 90.8 (90.6–91.1) | 100 (100–100) |
| All                     | Male   | 1995 | 3.2 (3.2–3.3) | 0.2 (0.2–0.3) | 1.1 (1–1.1)      | 4.6 (4.5–4.7)    | 70.9 (70–71.7)   | 5.2 (4.8–5.6)    | 23.9 (23.1–24.7) | 100 (100–100) |
| All                     | Male   | 2010 | 2.7 (2.6–2.7) | 0.7 (0.7–0.8) | 10.5 (10.4–10.6) | 13.9 (13.8–14)   | 19.1 (18.7–19.6) | 5.4 (5.1–5.6)    | 75.5 (75–76)     | 100 (100–100) |
| All                     | Male   | 2018 | 2.7 (2.7–2.8) | 1 (1–1.1)     | 15.4 (15.3–15.6) | 19.2 (19–19.4)   | 14.2 (13.9–14.5) | 5.3 (5.1–5.5)    | 80.5 (80.1–80.9) | 100 (100–100) |
| Femur                   | Female | 1995 | 1.8 (1.7–1.8) | 0.2 (0.2–0.3) | 0.6 (0.6–0.7)    | 2.6 (2.5–2.7)    | 66.7 (65.6–67.8) | 9.4 (8.7–10)     | 23.9 (22.9–24.9) | 100 (100–100) |
| Femur                   | Female | 2010 | 0.2 (0.2–0.2) | 0.1 (0.1–0.1) | 2.3 (2.3–2.4)    | 2.7 (2.6–2.8)    | 8.7 (8–9.3)      | 3.5 (3–3.9)      | 87.9 (87.1–88.7) | 100 (100–100) |
| Femur                   | Female | 2018 | 0.2 (0.2–0.2) | 0 (0–0.1)     | 2.3 (2.2–2.3)    | 2.5 (2.4–2.6)    | 7.7 (7–8.3)      | 1.9 (1.6–2.3)    | 90.4 (89.6–91.1) | 100 (100–100) |
| Femur                   | Male   | 1995 | 0.8 (0.7–0.8) | 0.1 (0.1–0.1) | 0.3 (0.2–0.3)    | 1.1 (1.1–1.1)    | 68.7 (66.9–70.4) | 7.8 (6.8–8.9)    | 23.5 (21.9–25.1) | 100 (100–100) |
| Femur                   | Male   | 2010 | 0.4 (0.4–0.5) | 0.1 (0–0.1)   | 1 (1–1.1)        | 1.5 (1.5–1.5)    | 28.4 (27–29.9)   | 3.8 (3.2–4.4)    | 67.8 (66.3–69.3) | 100 (100–100) |
| Femur                   | Male   | 2018 | 0.5 (0.4–0.5) | 0.1 (0.1–0.1) | 1.3 (1.2–1.3)    | 1.8 (1.7–1.9)    | 25.3 (24–26.6)   | 3.3 (2.8–3.8)    | 71.4 (70.1–72.7) | 100 (100–100) |
| Neck and trunk          | Female | 1995 | 1.1 (1.1–1.2) | 0 (0–0)       | 0.2 (0.2–0.2)    | 1.4 (1.4–1.4)    | 82.1 (80.8–83.3) | 2.2 (1.7–2.7)    | 15.7 (14.6–16.9) | 100 (100–100) |
| Neck and trunk          | Female | 2010 | 0.5 (0.5–0.5) | 0 (0–0.1)     | 1.2 (1.2–1.3)    | 1.8 (1.7–1.9)    | 27.8 (26.5–29.1) | 2.4 (2–2.8)      | 69.8 (68.5–71.2) | 100 (100–100) |
| Neck and trunk          | Female | 2018 | 0.4 (0.4–0.4) | 0 (0–0)       | 1.8 (1.8–1.9)    | 2.2 (2.1–2.3)    | 16.9 (15.9–17.8) | 1.7 (1.3–2)      | 81.5 (80.5–82.5) | 100 (100–100) |
| Neck and trunk          | Male   | 1995 | 1.3 (1.2–1.3) | 0 (0–0)       | 0.1 (0.1–0.1)    | 1.4 (1.4–1.4)    | 89.8 (88.8–90.8) | 1.8 (1.3–2.2)    | 8.4 (7.5–9.4)    | 100 (100–100) |
| Neck and trunk          | Male   | 2010 | 0.9 (0.9–1)   | 0.1 (0.1–0.1) | 1.1 (1–1.1)      | 2 (1.9–2.1)      | 44.7 (43.4–46.1) | 3.5 (3–4)        | 51.8 (50.4–53.1) | 100 (100–100) |
| Neck and trunk          | Male   | 2018 | 0.7 (0.7–0.7) | 0.1 (0.1–0.1) | 1.7 (1.6–1.7)    | 2.4 (2.3–2.5)    | 29 (27.9–30.2)   | 2.4 (2.1–2.8)    | 68.5 (67.3–69.7) | 100 (100–100) |
| Upper limb              | Female | 1995 | 2 (2–2.1)     | 0.2 (0.2–0.2) | 1.6 (1.6–1.6)    | 3.8 (3.7–3.9)    | 53.7 (52.7–54.7) | 4.3 (3.9–4.7)    | 42 (41–42.9)     | 100 (100–100) |
| Upper limb              | Female | 2010 | 0.8 (0.8–0.8) | 0.3 (0.3–0.3) | 12.4 (12.3–12.6) | 13.6 (13.5–13.7) | 6 (5.7–6.2)      | 2.3 (2.1–2.5)    | 91.7 (91.4–92)   | 100 (100–100) |
| Upper limb              | Female | 2018 | 1 (1–1)       | 0.3 (0.3–0.3) | 16.3 (16.1–16.4) | 17.6 (17.5–17.7) | 5.7 (5.5–5.9)    | 1.8 (1.6–1.9)    | 92.5 (92.3–92.8) | 100 (100–100) |
| Upper limb              | Male   | 1995 | 1.6 (1.6–1.7) | 0.1 (0.1–0.1) | 0.8 (0.8–0.8)    | 2.5 (2.4–2.6)    | 65.3 (64.1–66.5) | 2.8 (2.3–3.2)    | 32 (30.8–33.1)   | 100 (100–100) |
| Upper limb              | Male   | 2010 | 1.9 (1.8–1.9) | 0.4 (0.4–0.4) | 9.2 (9.1–9.3)    | 11.5 (11.4–11.6) | 16.1 (15.7–16.6) | 3.6 (3.3–3.8)    | 80.3 (79.8–80.8) | 100 (100–100) |
| Upper limb              | Male   | 2018 | 2.1 (2–2.1)   | 0.7 (0.6–0.7) | 13.7 (13.6–13.8) | 16.5 (16.4–16.6) | 12.7 (12.4–13)   | 4 (3.8–4.2)      | 83.3 (82.9–83.7) | 100 (100–100) |
| <b>Gastrointestinal</b> |        |      |               |               |                  |                  |                  |                  |                  |               |
| All                     | Female | 1995 | 4.7 (4.6–4.8) | 0.5 (0.5–0.6) | 1.1 (1–1.1)      | 6.3 (6.2–6.4)    | 74.7 (74–75.3)   | 8.4 (8–8.9)      | 16.9 (16.3–17.5) | 100 (100–100) |
| All                     | Female | 2010 | 2.8 (2.7–2.8) | 0.8 (0.8–0.8) | 7.9 (7.8–8)      | 11.4 (11.3–11.5) | 24.2 (23.7–24.7) | 7 (6.7–7.3)      | 68.8 (68.3–69.3) | 100 (100–100) |
| All                     | Female | 2018 | 2.7 (2.6–2.7) | 0.8 (0.8–0.8) | 12 (11.9–12.1)   | 15.5 (15.4–15.6) | 17.3 (16.9–17.6) | 5.1 (4.9–5.3)    | 77.6 (77.2–78.1) | 100 (100–100) |
| All                     | Male   | 1995 | 5.2 (5.1–5.3) | 0.6 (0.5–0.6) | 1.1 (1–1.1)      | 6.8 (6.7–6.9)    | 76.2 (75.6–76.9) | 8.4 (7.9–8.8)    | 15.4 (14.9–16)   | 100 (100–100) |
| All                     | Male   | 2010 | 3.3 (3.2–3.4) | 0.8 (0.8–0.9) | 7.6 (7.5–7.7)    | 11.7 (11.6–11.8) | 28.2 (27.7–28.7) | 7.1 (6.8–7.4)    | 64.7 (64.2–65.3) | 100 (100–100) |
| All                     | Male   | 2018 | 3.2 (3.2–3.3) | 0.8 (0.8–0.8) | 11.6 (11.5–11.8) | 15.7 (15.6–15.8) | 20.7 (20.3–21.1) | 5 (4.8–5.3)      | 74.3 (73.8–74.7) | 100 (100–100) |
| Appendicitis            | Female | 1995 | 1.2 (1.2–1.2) | 0 (0–0)       | 0.1 (0.1–0.1)    | 1.3 (1.3–1.3)    | 92.8 (92–93.7)   | 0.1 (0–0.3)      | 7 (6.2–7.9)      | 100 (100–100) |
| Appendicitis            | Female | 2010 | 2 (1.9–2)     | 0 (0–0)       | 1.3 (1.2–1.3)    | 3.2 (3.1–3.3)    | 60.7 (59.7–61.8) | 0.1 (0–0.2)      | 39.2 (38.1–40.2) | 100 (100–100) |

|                                   |        |      |               |               |               |               |                  |                  |                  |               |
|-----------------------------------|--------|------|---------------|---------------|---------------|---------------|------------------|------------------|------------------|---------------|
| Appendicitis                      | Female | 2018 | 2.4 (2.3–2.5) | 0 (0–0)       | 2.2 (2.2–2.3) | 4.6 (4.5–4.7) | 52 (51.1–52.9)   | 0.1 (0.1–0.2)    | 47.9 (47–48.8)   | 100 (100–100) |
| Appendicitis                      | Male   | 1995 | 1.4 (1.4–1.5) | 0 (0–0)       | 0.1 (0.1–0.1) | 1.5 (1.5–1.5) | 93.3 (92.4–94.1) | 0.1 (0–0.3)      | 6.6 (5.8–7.4)    | 100 (100–100) |
| Appendicitis                      | Male   | 2010 | 2.3 (2.3–2.4) | 0 (0–0)       | 1.3 (1.2–1.3) | 3.6 (3.5–3.7) | 64.4 (63.5–65.4) | 0.1 (0–0.2)      | 35.4 (34.4–36.4) | 100 (100–100) |
| Appendicitis                      | Male   | 2018 | 2.9 (2.8–2.9) | 0 (0–0)       | 2.3 (2.2–2.3) | 5.1 (5–5.2)   | 56 (55.1–56.8)   | 0.1 (0–0.1)      | 44 (43.1–44.8)   | 100 (100–100) |
| Cholecystitis                     | Female | 1995 | 0.5 (0.5–0.6) | 0 (0–0)       | 0.1 (0–0.1)   | 0.6 (0.6–0.6) | 89.9 (88.4–91.4) | 0.3 (0–0.6)      | 9.8 (8.3–11.2)   | 100 (100–100) |
| Cholecystitis                     | Female | 2010 | 0.2 (0.2–0.3) | 0 (0–0)       | 0.5 (0.5–0.6) | 0.8 (0.8–0.8) | 31.5 (29.5–33.5) | 0.2 (0–0.5)      | 68.2 (66.2–70.3) | 100 (100–100) |
| Cholecystitis                     | Female | 2018 | 0.2 (0.1–0.2) | 0 (0–0)       | 0.8 (0.8–0.9) | 1 (1–1)       | 16.3 (14.8–17.7) | 0.2 (0–0.4)      | 83.6 (82.1–85)   | 100 (100–100) |
| Cholecystitis                     | Male   | 1995 | 0.3 (0.3–0.4) | 0 (0–0)       | 0 (0–0.1)     | 0.4 (0.4–0.4) | 87.6 (85.5–89.8) | 1.1 (0.4–1.7)    | 11.3 (9.3–13.3)  | 100 (100–100) |
| Cholecystitis                     | Male   | 2010 | 0.1 (0.1–0.1) | 0 (0–0)       | 0.4 (0.4–0.5) | 0.5 (0.5–0.5) | 19.8 (17.7–22)   | 0.4 (0–0.7)      | 79.8 (77.6–81.9) | 100 (100–100) |
| Cholecystitis                     | Male   | 2018 | 0.1 (0.1–0.1) | 0 (0–0)       | 0.7 (0.6–0.7) | 0.7 (0.7–0.7) | 8.7 (7.4–10)     | 0.3 (0–0.5)      | 91.1 (89.7–92.4) | 100 (100–100) |
| Diverticular disease              | Female | 1995 | 1 (0.9–1)     | 0.1 (0.1–0.1) | 0.2 (0.2–0.3) | 1.3 (1.3–1.3) | 76.2 (74.8–77.7) | 5.3 (4.6–6.1)    | 18.5 (17.2–19.8) | 100 (100–100) |
| Diverticular disease              | Female | 2010 | 0.2 (0.2–0.2) | 0.1 (0.1–0.1) | 2.4 (2.3–2.4) | 2.6 (2.5–2.7) | 6.4 (5.8–7)      | 2.8 (2.4–3.2)    | 90.8 (90.1–91.5) | 100 (100–100) |
| Diverticular disease              | Male   | 1995 | 0.6 (0.6–0.6) | 0 (0–0)       | 0.2 (0.1–0.2) | 0.8 (0.8–0.8) | 74.9 (72.9–76.8) | 4.5 (3.6–5.5)    | 20.6 (18.8–22.4) | 100 (100–100) |
| Diverticular disease              | Male   | 2010 | 0.1 (0.1–0.1) | 0 (0–0.1)     | 1.8 (1.7–1.8) | 1.9 (1.8–2)   | 6 (5.3–6.7)      | 2.3 (1.8–2.7)    | 91.7 (91–92.5)   | 100 (100–100) |
| Diverticular disease              | Male   | 2018 | 0 (0–0.1)     | 0 (0–0)       | 4 (3.9–4.1)   | 4.1 (4–4.2)   | 1.2 (1–1.4)      | 0.6 (0.5–0.8)    | 98.2 (98–98.5)   | 100 (100–100) |
| Diverticular disease of intestine | Female | 2018 | 0.1 (0.1–0.1) | 0.1 (0–0.1)   | 4.5 (4.4–4.6) | 4.6 (4.5–4.7) | 1.5 (1.3–1.7)    | 1.1 (0.9–1.3)    | 97.4 (97.1–97.6) | 100 (100–100) |
| IBD                               | Female | 1995 | 0.2 (0.2–0.2) | 0.1 (0.1–0.2) | 0.1 (0.1–0.1) | 0.4 (0.4–0.4) | 41.7 (38.9–44.6) | 33 (30.3–35.8)   | 25.2 (22.7–27.7) | 100 (100–100) |
| IBD                               | Female | 2010 | 0.1 (0.1–0.1) | 0.2 (0.2–0.3) | 0.8 (0.8–0.9) | 1.2 (1.2–1.2) | 7.7 (6.7–8.6)    | 19.8 (18.4–21.3) | 72.5 (70.9–74.1) | 100 (100–100) |
| IBD                               | Male   | 1995 | 0.2 (0.2–0.2) | 0.1 (0.1–0.1) | 0.1 (0.1–0.1) | 0.4 (0.4–0.4) | 44.5 (41.4–47.7) | 30.4 (27.4–33.3) | 25.1 (22.4–27.9) | 100 (100–100) |
| IBD                               | Male   | 2010 | 0.1 (0.1–0.1) | 0.2 (0.2–0.2) | 0.8 (0.7–0.8) | 1 (1–1)       | 8.5 (7.4–9.6)    | 17.8 (16.3–19.2) | 73.8 (72.1–75.5) | 100 (100–100) |
| IBD                               | Male   | 2018 | 0.1 (0.1–0.1) | 0.2 (0.1–0.2) | 1.2 (1.2–1.3) | 1.5 (1.5–1.5) | 4.1 (3.5–4.8)    | 10.5 (9.5–11.5)  | 85.4 (84.2–86.6) | 100 (100–100) |
| Inflammatory bowel disease        | Female | 2018 | 0.1 (0.1–0.1) | 0.2 (0.2–0.3) | 1.4 (1.3–1.4) | 1.7 (1.7–1.7) | 4.1 (3.5–4.7)    | 13.9 (12.9–15)   | 82 (80.8–83.1)   | 100 (100–100) |
| Liver disease                     | Female | 1995 | 0.3 (0.2–0.3) | 0.1 (0.1–0.1) | 0.1 (0.1–0.1) | 0.5 (0.5–0.5) | 59.5 (56.7–62.3) | 16 (13.9–18.1)   | 24.5 (22–26.9)   | 100 (100–100) |
| Liver disease                     | Female | 2010 | 0.1 (0.1–0.1) | 0 (0–0.1)     | 0.8 (0.8–0.9) | 1 (1–1)       | 9.5 (8.4–10.7)   | 4.4 (3.6–5.2)    | 86.1 (84.7–87.4) | 100 (100–100) |
| Liver disease                     | Female | 2018 | 0.1 (0–0.1)   | 0 (0–0)       | 1.2 (1.2–1.3) | 1.3 (1.3–1.3) | 4.2 (3.5–4.9)    | 1.8 (1.3–2.3)    | 94 (93.2–94.8)   | 100 (100–100) |
| Liver disease                     | Male   | 1995 | 0.5 (0.4–0.5) | 0.1 (0.1–0.1) | 0.1 (0.1–0.2) | 0.7 (0.7–0.7) | 64.9 (62.6–67.2) | 14.1 (12.4–15.8) | 21 (19.1–23)     | 100 (100–100) |
| Liver disease                     | Male   | 2010 | 0.1 (0.1–0.1) | 0 (0–0.1)     | 1.1 (1.1–1.1) | 1.3 (1.3–1.3) | 10.4 (9.3–11.4)  | 3.4 (2.8–4)      | 86.2 (85–87.5)   | 100 (100–100) |
| Liver disease                     | Male   | 2018 | 0.1 (0.1–0.1) | 0 (0–0)       | 1.5 (1.4–1.5) | 1.6 (1.6–1.6) | 5.7 (4.9–6.4)    | 2.2 (1.7–2.7)    | 92.1 (91.3–93)   | 100 (100–100) |
| Pancreatitis                      | Female | 1995 | 0.2 (0.2–0.2) | 0 (0–0)       | 0.1 (0.1–0.1) | 0.3 (0.3–0.3) | 63.5 (60.2–66.9) | 8.8 (6.8–10.8)   | 27.7 (24.6–30.8) | 100 (100–100) |
| Pancreatitis                      | Female | 2010 | 0.1 (0.1–0.1) | 0 (0–0)       | 0.6 (0.6–0.6) | 0.7 (0.7–0.7) | 12.1 (10.6–13.6) | 2.8 (2–3.5)      | 85.1 (83.5–86.8) | 100 (100–100) |
| Pancreatitis                      | Female | 2018 | 0.1 (0.1–0.1) | 0 (0–0)       | 0.9 (0.9–1)   | 1 (1–1)       | 6.1 (5.2–7)      | 1.7 (1.2–2.2)    | 92.2 (91.2–93.2) | 100 (100–100) |
| Pancreatitis                      | Male   | 1995 | 0.3 (0.3–0.4) | 0.1 (0.1–0.1) | 0.1 (0.1–0.2) | 0.6 (0.6–0.6) | 62.5 (59.9–65.1) | 12.5 (10.7–14.3) | 25 (22.7–27.3)   | 100 (100–100) |
| Pancreatitis                      | Male   | 2010 | 0.1 (0.1–0.2) | 0.1 (0–0.1)   | 0.8 (0.7–0.8) | 1 (1–1)       | 15.4 (13.9–16.8) | 5.3 (4.4–6.2)    | 79.4 (77.7–81)   | 100 (100–100) |
| Pancreatitis                      | Male   | 2018 | 0.1 (0.1–0.1) | 0 (0–0)       | 1.1 (1.1–1.1) | 1.2 (1.2–1.2) | 6.9 (6–7.9)      | 3.2 (2.6–3.9)    | 89.8 (88.8–90.9) | 100 (100–100) |
| UGB                               | Female | 1995 | 0.6 (0.5–0.6) | 0 (0–0)       | 0.1 (0.1–0.2) | 0.7 (0.7–0.7) | 77 (75.1–78.9)   | 2.6 (1.9–3.3)    | 20.4 (18.6–22.2) | 100 (100–100) |
| UGB                               | Female | 2010 | 0.2 (0.1–0.2) | 0 (0–0)       | 0.7 (0.7–0.7) | 0.9 (0.9–0.9) | 17.7 (16.1–19.3) | 1.8 (1.3–2.4)    | 80.5 (78.8–82.2) | 100 (100–100) |
| UGB                               | Female | 2018 | 0.1 (0.1–0.1) | 0 (0–0)       | 0.6 (0.6–0.6) | 0.7 (0.7–0.7) | 11.3 (9.9–12.8)  | 0.8 (0.4–1.3)    | 87.8 (86.3–89.3) | 100 (100–100) |
| UGB                               | Male   | 1995 | 0.9 (0.8–0.9) | 0 (0–0)       | 0.2 (0.2–0.2) | 1.1 (1.1–1.1) | 81.1 (79.6–82.6) | 2.2 (1.6–2.7)    | 16.7 (15.3–18.2) | 100 (100–100) |
| UGB                               | Male   | 2010 | 0.3 (0.3–0.3) | 0 (0–0)       | 0.9 (0.8–0.9) | 1.2 (1.2–1.2) | 24.4 (22.8–26)   | 2.8 (2.2–3.4)    | 72.8 (71.2–74.4) | 100 (100–100) |
| UGB                               | Male   | 2018 | 0.2 (0.2–0.2) | 0 (0–0)       | 0.8 (0.8–0.9) | 1 (1–1)       | 17.4 (15.9–18.8) | 2.6 (1.9–3.2)    | 80.1 (78.5–81.6) | 100 (100–100) |
| Ulcer disease                     | Female | 1995 | 1.4 (1.3–1.4) | 0.1 (0.1–0.1) | 0.4 (0.4–0.5) | 1.9 (1.8–2)   | 72.5 (71.3–73.8) | 5 (4.4–5.6)      | 22.5 (21.4–23.7) | 100 (100–100) |
| Ulcer disease                     | Female | 2010 | 0.4 (0.4–0.4) | 0.1 (0.1–0.1) | 2.2 (2.1–2.2) | 2.7 (2.6–2.8) | 15 (14.2–15.8)   | 3.6 (3.2–4.1)    | 81.4 (80.4–82.3) | 100 (100–100) |
| Ulcer disease                     | Female | 2018 | 0.2 (0.2–0.2) | 0.1 (0–0.1)   | 2.5 (2.4–2.6) | 2.8 (2.7–2.9) | 8.2 (7.6–8.8)    | 2 (1.7–2.3)      | 89.8 (89.1–90.5) | 100 (100–100) |
| Ulcer disease                     | Male   | 1995 | 1.8 (1.7–1.8) | 0.1 (0.1–0.1) | 0.4 (0.4–0.4) | 2.3 (2.2–2.4) | 77.5 (76.3–78.6) | 4.7 (4.1–5.2)    | 17.9 (16.9–18.9) | 100 (100–100) |

|                     |        |      |               |               |               |               |                  |                  |                  |               |
|---------------------|--------|------|---------------|---------------|---------------|---------------|------------------|------------------|------------------|---------------|
| Ulcer disease       | Male   | 2010 | 0.6 (0.6–0.7) | 0.1 (0.1–0.2) | 2.2 (2.1–2.2) | 2.9 (2.8–3)   | 21.1 (20.2–22)   | 4.8 (4.3–5.2)    | 74.1 (73.1–75.2) | 100 (100–100) |
| Ulcer disease       | Male   | 2018 | 0.4 (0.3–0.4) | 0.1 (0.1–0.1) | 2.5 (2.4–2.5) | 2.9 (2.8–3)   | 12.7 (11.9–13.5) | 3.2 (2.8–3.6)    | 84 (83.2–84.9)   | 100 (100–100) |
| <b>Neurological</b> |        |      |               |               |               |               |                  |                  |                  |               |
| All                 | Female | 1995 | 1.6 (1.5–1.6) | 0.1 (0.1–0.2) | 0.7 (0.7–0.7) | 2.4 (2.3–2.5) | 65.3 (64.1–66.5) | 6.1 (5.5–6.7)    | 28.6 (27.5–29.7) | 100 (100–100) |
| All                 | Female | 2010 | 0.2 (0.2–0.2) | 0.1 (0.1–0.1) | 4.1 (4–4.2)   | 4.4 (4.3–4.5) | 5.2 (4.8–5.6)    | 2 (1.8–2.3)      | 92.8 (92.3–93.3) | 100 (100–100) |
| All                 | Female | 2018 | 0.1 (0.1–0.1) | 0.1 (0–0.1)   | 4.8 (4.7–4.8) | 4.9 (4.8–5)   | 2.5 (2.2–2.8)    | 1 (0.8–1.2)      | 96.5 (96.1–96.8) | 100 (100–100) |
| All                 | Male   | 1995 | 1.7 (1.7–1.8) | 0.2 (0.2–0.2) | 0.7 (0.7–0.7) | 2.6 (2.5–2.7) | 65.7 (64.5–66.9) | 7.5 (6.8–8.1)    | 26.8 (25.7–27.9) | 100 (100–100) |
| All                 | Male   | 2010 | 0.3 (0.2–0.3) | 0.1 (0.1–0.1) | 4.4 (4.3–4.5) | 4.8 (4.7–4.9) | 5.2 (4.8–5.7)    | 2.4 (2.1–2.7)    | 92.3 (91.9–92.8) | 100 (100–100) |
| All                 | Male   | 2018 | 0.1 (0.1–0.1) | 0.1 (0–0.1)   | 5.3 (5.2–5.4) | 5.5 (5.4–5.6) | 2.2 (2–2.5)      | 1 (0.8–1.2)      | 96.8 (96.5–97.1) | 100 (100–100) |
| Dementia            | Female | 1995 | 0.3 (0.3–0.3) | 0 (0–0)       | 0.2 (0.2–0.2) | 0.5 (0.5–0.5) | 57 (54.4–59.7)   | 4.8 (3.7–6)      | 38.1 (35.6–40.7) | 100 (100–100) |
| Dementia            | Female | 2010 | 0 (0–0)       | 0 (0–0)       | 1.1 (1–1.1)   | 1.1 (1.1–1.1) | 2.1 (1.6–2.7)    | 0.2 (0–0.3)      | 97.7 (97.1–98.2) | 100 (100–100) |
| Dementia            | Female | 2018 | 0 (0–0)       | 0 (0–0)       | 1.2 (1.1–1.2) | 1.2 (1.2–1.2) | 0.7 (0.4–0.9)    | 0 (0–0)          | 99.3 (99.1–99.6) | 100 (100–100) |
| Dementia            | Male   | 1995 | 0.2 (0.2–0.2) | 0 (0–0)       | 0.1 (0.1–0.2) | 0.4 (0.4–0.4) | 56.9 (53.5–60.2) | 4.2 (2.8–5.6)    | 38.9 (35.6–42.2) | 100 (100–100) |
| Dementia            | Male   | 2010 | 0 (0–0)       | 0 (0–0)       | 0.7 (0.6–0.7) | 0.7 (0.7–0.7) | 4.1 (3.2–5)      | 0.3 (0–0.5)      | 95.6 (94.6–96.6) | 100 (100–100) |
| Dementia            | Male   | 2018 | 0 (0–0)       | 0 (0–0)       | 0.8 (0.8–0.8) | 0.8 (0.8–0.8) | 1.5 (1–2)        | 0.2 (0–0.5)      | 98.2 (97.7–98.8) | 100 (100–100) |
| Stroke              | Female | 1995 | 1.3 (1.3–1.4) | 0.1 (0.1–0.1) | 0.5 (0.5–0.6) | 2 (1.9–2.1)   | 67.6 (66.3–68.9) | 5.6 (4.9–6.2)    | 26.8 (25.6–28)   | 100 (100–100) |
| Stroke              | Female | 2010 | 0.2 (0.2–0.2) | 0.1 (0.1–0.1) | 3.2 (3.2–3.3) | 3.5 (3.4–3.6) | 6.1 (5.6–6.6)    | 2.3 (2–2.6)      | 91.6 (91–92.2)   | 100 (100–100) |
| Stroke              | Female | 2018 | 0.1 (0.1–0.1) | 0 (0–0.1)     | 3.8 (3.7–3.9) | 4 (3.9–4.1)   | 3.1 (2.8–3.5)    | 1.1 (0.9–1.3)    | 95.7 (95.3–96.1) | 100 (100–100) |
| Stroke              | Male   | 1995 | 1.6 (1.5–1.6) | 0.2 (0.2–0.2) | 0.6 (0.6–0.6) | 2.3 (2.2–2.4) | 67 (65.8–68.3)   | 7.4 (6.7–8)      | 25.6 (24.5–26.8) | 100 (100–100) |
| Stroke              | Male   | 2010 | 0.2 (0.2–0.2) | 0.1 (0.1–0.1) | 3.9 (3.8–4)   | 4.2 (4.1–4.3) | 5.4 (5–5.8)      | 2.5 (2.2–2.8)    | 92.1 (91.6–92.6) | 100 (100–100) |
| Stroke              | Male   | 2018 | 0.1 (0.1–0.1) | 0 (0–0.1)     | 4.7 (4.6–4.8) | 4.8 (4.7–4.9) | 2.4 (2.1–2.7)    | 1 (0.8–1.2)      | 96.6 (96.3–97)   | 100 (100–100) |
| <b>Pulmonary</b>    |        |      |               |               |               |               |                  |                  |                  |               |
| CPD                 | Female | 1995 | 1.6 (1.6–1.7) | 0.5 (0.5–0.5) | 0.8 (0.8–0.8) | 3 (2.9–3.1)   | 55.5 (54.4–56.6) | 17.2 (16.3–18)   | 27.3 (26.3–28.3) | 100 (100–100) |
| CPD                 | Female | 2010 | 0.4 (0.4–0.5) | 0.5 (0.4–0.5) | 5.4 (5.4–5.5) | 6.3 (6.2–6.4) | 6.7 (6.3–7.1)    | 7.4 (7–7.8)      | 85.9 (85.4–86.4) | 100 (100–100) |
| CPD                 | Female | 2018 | 0.4 (0.3–0.4) | 0.4 (0.4–0.5) | 7.8 (7.7–7.9) | 8.6 (8.5–8.7) | 4.3 (4–4.5)      | 5.1 (4.9–5.4)    | 90.6 (90.2–91)   | 100 (100–100) |
| CPD                 | Male   | 1995 | 1.7 (1.7–1.8) | 0.5 (0.5–0.5) | 0.8 (0.8–0.9) | 3.1 (3–3.2)   | 56.1 (54.9–57.2) | 16.7 (15.9–17.6) | 27.2 (26.2–28.2) | 100 (100–100) |
| CPD                 | Male   | 2010 | 0.4 (0.4–0.4) | 0.3 (0.3–0.4) | 4.6 (4.5–4.6) | 5.3 (5.2–5.4) | 7.1 (6.7–7.6)    | 6.3 (5.9–6.7)    | 86.6 (86–87.2)   | 100 (100–100) |
| CPD                 | Male   | 2018 | 0.4 (0.4–0.5) | 0.3 (0.3–0.3) | 6.4 (6.3–6.5) | 7.1 (7–7.2)   | 6.3 (5.9–6.7)    | 4.5 (4.2–4.8)    | 89.2 (88.7–89.6) | 100 (100–100) |
| <b>Rheumatic</b>    |        |      |               |               |               |               |                  |                  |                  |               |
| All                 | Female | 1995 | 0.4 (0.4–0.5) | 0.4 (0.3–0.4) | 0.3 (0.3–0.3) | 1.1 (1.1–1.1) | 41.3 (39.5–43.1) | 33.5 (31.8–35.2) | 25.2 (23.6–26.8) | 100 (100–100) |
| All                 | Female | 2010 | 0.1 (0.1–0.1) | 0.2 (0.2–0.2) | 1.6 (1.6–1.7) | 1.9 (1.8–2)   | 4.5 (4–5.1)      | 11.9 (11–12.8)   | 83.6 (82.5–84.6) | 100 (100–100) |
| All                 | Female | 2018 | 0.1 (0–0.1)   | 0.2 (0.1–0.2) | 2.4 (2.3–2.4) | 2.6 (2.5–2.7) | 2 (1.7–2.4)      | 6.3 (5.7–6.8)    | 91.7 (91–92.4)   | 100 (100–100) |
| All                 | Male   | 1995 | 0.2 (0.2–0.3) | 0.1 (0.1–0.1) | 0.1 (0.1–0.2) | 0.5 (0.5–0.5) | 46.2 (43.5–49)   | 25.5 (23.1–27.9) | 28.3 (25.8–30.8) | 100 (100–100) |
| All                 | Male   | 2010 | 0.1 (0.1–0.1) | 0.1 (0.1–0.1) | 0.9 (0.9–0.9) | 1.1 (1.1–1.1) | 5.9 (5–6.8)      | 9.9 (8.8–11.1)   | 84.1 (82.7–85.5) | 100 (100–100) |
| All                 | Male   | 2018 | 0 (0–0.1)     | 0.1 (0.1–0.1) | 1.4 (1.3–1.4) | 1.5 (1.5–1.5) | 2.9 (2.3–3.4)    | 4.8 (4.1–5.5)    | 92.3 (91.4–93.2) | 100 (100–100) |
| Psoriatic arthritis | Female | 1995 | 0 (0–0)       | 0 (0–0)       | 0 (0–0)       | 0.1 (0.1–0.1) | 43.5 (37.1–49.9) | 19.6 (14.4–24.7) | 37 (30.7–43.2)   | 100 (100–100) |
| Psoriatic arthritis | Female | 2010 | 0 (0–0)       | 0 (0–0)       | 0.3 (0.3–0.3) | 0.3 (0.3–0.3) | 3.6 (2.3–4.8)    | 4.8 (3.3–6.2)    | 91.7 (89.8–93.5) | 100 (100–100) |
| Psoriatic arthritis | Female | 2018 | 0 (0–0)       | 0 (0–0)       | 0.5 (0.5–0.6) | 0.6 (0.6–0.6) | 1.4 (0.8–2)      | 2.8 (1.9–3.6)    | 95.9 (94.8–96.9) | 100 (100–100) |
| Psoriatic arthritis | Male   | 1995 | 0 (0–0)       | 0 (0–0)       | 0 (0–0)       | 0.1 (0.1–0.1) | 51.6 (43.7–59.5) | 12.9 (7.6–18.2)  | 35.5 (28–43)     | 100 (100–100) |
| Psoriatic arthritis | Male   | 2010 | 0 (0–0)       | 0 (0–0)       | 0.2 (0.2–0.3) | 0.3 (0.3–0.3) | 4.5 (2.9–6)      | 5.2 (3.5–6.9)    | 90.3 (88.1–92.5) | 100 (100–100) |
| Psoriatic arthritis | Male   | 2018 | 0 (0–0)       | 0 (0–0)       | 0.4 (0.4–0.5) | 0.5 (0.5–0.5) | 1.8 (1–2.5)      | 3.1 (2.1–4.1)    | 95.1 (93.9–96.4) | 100 (100–100) |
| Rheumatic arthritis | Female | 1995 | 0.4 (0.4–0.4) | 0.3 (0.3–0.3) | 0.2 (0.2–0.2) | 0.9 (0.9–0.9) | 42.6 (40.6–44.6) | 34.7 (32.8–36.7) | 22.7 (21–24.4)   | 100 (100–100) |
| Rheumatic arthritis | Female | 2010 | 0.1 (0.1–0.1) | 0.2 (0.2–0.2) | 1.1 (1.1–1.2) | 1.4 (1.4–1.4) | 5.2 (4.4–5.9)    | 13 (11.9–14.1)   | 81.8 (80.6–83.1) | 100 (100–100) |
| Rheumatic arthritis | Female | 2018 | 0 (0–0.1)     | 0.1 (0.1–0.1) | 1.5 (1.4–1.5) | 1.6 (1.6–1.6) | 2.7 (2.2–3.1)    | 6.9 (6.1–7.6)    | 90.5 (89.6–91.4) | 100 (100–100) |
| Rheumatic arthritis | Male   | 1995 | 0.2 (0.1–0.2) | 0.1 (0.1–0.1) | 0.1 (0.1–0.1) | 0.4 (0.4–0.4) | 43.7 (40.4–47)   | 28.7 (25.7–31.7) | 27.6 (24.6–30.6) | 100 (100–100) |
| Rheumatic arthritis | Male   | 2010 | 0 (0–0)       | 0.1 (0–0.1)   | 0.5 (0.4–0.5) | 0.5 (0.5–0.5) | 6 (4.7–7.2)      | 10.4 (8.8–12.1)  | 83.6 (81.6–85.6) | 100 (100–100) |

|                     |        |      |               |               |               |               |                  |                  |                  |               |
|---------------------|--------|------|---------------|---------------|---------------|---------------|------------------|------------------|------------------|---------------|
| Rheumatic arthritis | Male   | 2018 | 0 (0–0)       | 0 (0–0)       | 0.6 (0.6–0.6) | 0.7 (0.7–0.7) | 3.1 (2.3–4)      | 4.4 (3.4–5.4)    | 92.5 (91.2–93.8) | 100 (100–100) |
| SLE                 | Female | 1995 | 0 (0–0)       | 0 (0–0)       | 0 (0–0)       | 0.1 (0.1–0.1) | 34.9 (28.5–41.3) | 25.6 (19.7–31.4) | 39.5 (33–46.1)   | 100 (100–100) |
| SLE                 | Female | 2010 | 0 (0–0)       | 0 (0–0)       | 0.1 (0.1–0.1) | 0.1 (0.1–0.1) | 6.8 (4.3–9.4)    | 17.8 (13.9–21.7) | 75.3 (70.9–79.8) | 100 (100–100) |
| SLE                 | Female | 2018 | 0 (0–0)       | 0 (0–0)       | 0.2 (0.1–0.2) | 0.2 (0.2–0.2) | 4.2 (2.4–6)      | 11.6 (8.7–14.5)  | 84.2 (80.9–87.5) | 100 (100–100) |
| SLE                 | Male   | 1995 | 0 (0–0)       | 0 (0–0)       | 0 (0–0)       | 0 (0–0)       | 40 (20.8–59.2)   | 20 (4.3–35.7)    | 40 (20.8–59.2)   | 100 (100–100) |
| SLE                 | Male   | 2010 | 0 (0–0)       | 0 (0–0)       | 0 (0–0)       | 0 (0–0)       | 7.1 (1.1–13.2)   | 14.3 (6.1–22.5)  | 78.6 (69–88.2)   | 100 (100–100) |
| SLE                 | Male   | 2018 | 0 (0–0)       | 0 (0–0)       | 0 (0–0)       | 0 (0–0)       | 5.3 (0.8–9.8)    | 10.5 (4.4–16.7)  | 84.2 (76.9–91.5) | 100 (100–100) |
| Spondylitis         | Female | 1995 | 0 (0–0)       | 0 (0–0)       | 0 (0–0)       | 0 (0–0)       | 45 (35.2–54.8)   | 20 (12.2–27.8)   | 35 (25.7–44.3)   | 100 (100–100) |
| Spondylitis         | Female | 2010 | 0 (0–0)       | 0 (0–0)       | 0.2 (0.1–0.2) | 0.2 (0.2–0.2) | 3.3 (1.7–4.9)    | 5.5 (3.4–7.6)    | 91.2 (88.6–93.8) | 100 (100–100) |
| Spondylitis         | Female | 2018 | 0 (0–0)       | 0 (0–0)       | 0.4 (0.3–0.4) | 0.4 (0.4–0.4) | 1.1 (0.4–1.7)    | 2.6 (1.6–3.6)    | 96.3 (95.1–97.5) | 100 (100–100) |
| Spondylitis         | Male   | 1995 | 0.1 (0–0.1)   | 0 (0–0)       | 0 (0–0)       | 0.1 (0.1–0.1) | 56.5 (50.1–62.9) | 17.4 (12.5–22.3) | 26.1 (20.4–31.8) | 100 (100–100) |
| Spondylitis         | Male   | 2010 | 0 (0–0)       | 0 (0–0)       | 0.2 (0.2–0.2) | 0.3 (0.3–0.3) | 8.4 (6.3–10.5)   | 9.9 (7.6–12.2)   | 81.7 (78.7–84.6) | 100 (100–100) |
| Spondylitis         | Male   | 2018 | 0 (0–0)       | 0 (0–0)       | 0.4 (0.4–0.4) | 0.4 (0.4–0.4) | 4.4 (3.2–5.7)    | 5.4 (4–6.8)      | 90.2 (88.4–92)   | 100 (100–100) |
| <b>Urogenital</b>   |        |      |               |               |               |               |                  |                  |                  |               |
| All                 | Female | 1995 | 0.4 (0.4–0.4) | 0.1 (0.1–0.1) | 0.2 (0.1–0.2) | 0.7 (0.7–0.7) | 63.9 (61.6–66.2) | 11.5 (10–13)     | 24.6 (22.6–26.7) | 100 (100–100) |
| All                 | Female | 2010 | 0.3 (0.2–0.3) | 0.1 (0.1–0.1) | 1.5 (1.5–1.6) | 1.8 (1.7–1.9) | 14 (13–15)       | 3.9 (3.4–4.5)    | 82.1 (81–83.2)   | 100 (100–100) |
| All                 | Female | 2018 | 0.3 (0.3–0.3) | 0.1 (0.1–0.1) | 2.8 (2.7–2.8) | 3.1 (3–3.2)   | 9.5 (8.8–10.1)   | 2.5 (2.2–2.9)    | 88 (87.3–88.7)   | 100 (100–100) |
| All                 | Male   | 1995 | 0.3 (0.3–0.3) | 0.1 (0.1–0.1) | 0.2 (0.2–0.2) | 0.6 (0.6–0.6) | 50 (47.5–52.5)   | 15.9 (14–17.7)   | 34.1 (31.7–36.5) | 100 (100–100) |
| All                 | Male   | 2010 | 0.1 (0.1–0.1) | 0.1 (0–0.1)   | 1.7 (1.6–1.7) | 1.9 (1.8–2)   | 7.1 (6.3–7.8)    | 3 (2.5–3.5)      | 89.9 (89.1–90.8) | 100 (100–100) |
| All                 | Male   | 2018 | 0.1 (0.1–0.1) | 0.1 (0–0.1)   | 2.8 (2.8–2.9) | 3 (2.9–3.1)   | 4 (3.5–4.4)      | 1.8 (1.5–2.1)    | 94.3 (93.7–94.8) | 100 (100–100) |
| Pyelonephritis      | Female | 1995 | 0.2 (0.2–0.3) | 0 (0–0)       | 0.1 (0.1–0.1) | 0.3 (0.3–0.3) | 74.4 (71.5–77.3) | 2.9 (1.8–4)      | 22.7 (19.9–25.5) | 100 (100–100) |
| Pyelonephritis      | Female | 2010 | 0.2 (0.2–0.2) | 0 (0–0)       | 0.7 (0.6–0.7) | 0.9 (0.9–0.9) | 20.8 (19.1–22.5) | 1.6 (1.1–2.1)    | 77.6 (75.9–79.4) | 100 (100–100) |
| Pyelonephritis      | Female | 2018 | 0.2 (0.2–0.3) | 0 (0–0)       | 1.2 (1.2–1.2) | 1.5 (1.5–1.5) | 16.2 (15–17.3)   | 1.7 (1.3–2.2)    | 82.1 (80.9–83.3) | 100 (100–100) |
| Pyelonephritis      | Male   | 1995 | 0.1 (0.1–0.1) | 0 (0–0)       | 0 (0–0.1)     | 0.1 (0.1–0.1) | 62.1 (56.5–67.7) | 1.7 (0.2–3.2)    | 36.2 (30.7–41.7) | 100 (100–100) |
| Pyelonephritis      | Male   | 2010 | 0 (0–0)       | 0 (0–0)       | 0.4 (0.4–0.4) | 0.4 (0.4–0.4) | 9.1 (7.3–10.8)   | 1 (0.4–1.5)      | 90 (88.1–91.8)   | 100 (100–100) |
| Pyelonephritis      | Male   | 2018 | 0 (0–0)       | 0 (0–0)       | 0.6 (0.5–0.6) | 0.6 (0.6–0.6) | 6.8 (5.6–8.1)    | 0.7 (0.3–1.1)    | 92.5 (91.1–93.8) | 100 (100–100) |
| Renal disease       | Female | 1995 | 0.2 (0.2–0.2) | 0.1 (0.1–0.1) | 0.1 (0.1–0.1) | 0.4 (0.4–0.4) | 54.6 (51.5–57.7) | 17.3 (15–19.7)   | 28.1 (25.2–30.9) | 100 (100–100) |
| Renal disease       | Female | 2010 | 0.1 (0.1–0.1) | 0.1 (0–0.1)   | 0.9 (0.9–0.9) | 1.1 (1.1–1.1) | 9 (7.9–10.1)     | 5 (4.1–5.8)      | 86 (84.7–87.3)   | 100 (100–100) |
| Renal disease       | Female | 2018 | 0.1 (0.1–0.1) | 0 (0–0.1)     | 1.7 (1.7–1.8) | 1.8 (1.7–1.9) | 4.3 (3.8–4.9)    | 2.4 (2–2.9)      | 93.2 (92.5–94)   | 100 (100–100) |
| Renal disease       | Male   | 1995 | 0.3 (0.2–0.3) | 0.1 (0.1–0.1) | 0.2 (0.2–0.2) | 0.5 (0.5–0.5) | 47.6 (44.9–50.4) | 17.5 (15.4–19.6) | 34.9 (32.3–37.6) | 100 (100–100) |
| Renal disease       | Male   | 2010 | 0.1 (0.1–0.1) | 0 (0–0.1)     | 1.4 (1.3–1.4) | 1.5 (1.5–1.5) | 6.6 (5.8–7.4)    | 3.3 (2.7–3.9)    | 90.2 (89.2–91.1) | 100 (100–100) |
| Renal disease       | Male   | 2018 | 0.1 (0.1–0.1) | 0 (0–0.1)     | 2.4 (2.3–2.5) | 2.5 (2.4–2.6) | 3.3 (2.9–3.8)    | 1.9 (1.5–2.2)    | 94.8 (94.2–95.4) | 100 (100–100) |

**Abbreviations**

AMI, Acute myocardial infarction; CI, Confidence interval; CPD, Chronic pulmonary disease; IBD, Inflammatory bowel disease; ICD, International Classification of Diseases; PAD, Peripheral artery disease

# FIGURES

## Formulas

### Figure S1

Formulas used to calculate the estimated proportions relative to the total sample and the diseased sample, and equation for calculating 95% confidence intervals.

**Proportion of sample:**

$$\hat{p}_{ICD_i} = \frac{\#ICD_i}{500,000}$$

where  $\hat{p}$  is estimated proportion, # is number, and  $i$  is the specific ICD-group (ie, ICD-8, ICD-8+ICD-10, or ICD-10)

**Proportion of diseased:**

$$\hat{p}_{ICD_i} = \frac{\#ICD_i}{\sum_{i=ICD-8}^{ICD-10} \#ICD_i}$$

where  $\hat{p}$  is estimated proportion, # is number, and  $i$  is the specific ICD-group (ie, ICD-8, ICD-8+ICD-10, or ICD-10)

**95% confidence interval:**

$$95\% CI = \hat{p} \pm 1.96 * \sqrt{\frac{\hat{p}(1 - \hat{p})}{n}}$$

where  $\hat{p}$  is estimated proportion and  $n$  is number



## Overall

**Figure S2. Cardiovascular diseases.**

Proportion of persons identified with ICD-10 codes only, ICD-8 and ICD-10 codes, or ICD-8 codes only. Grouped by diseases and sample year.

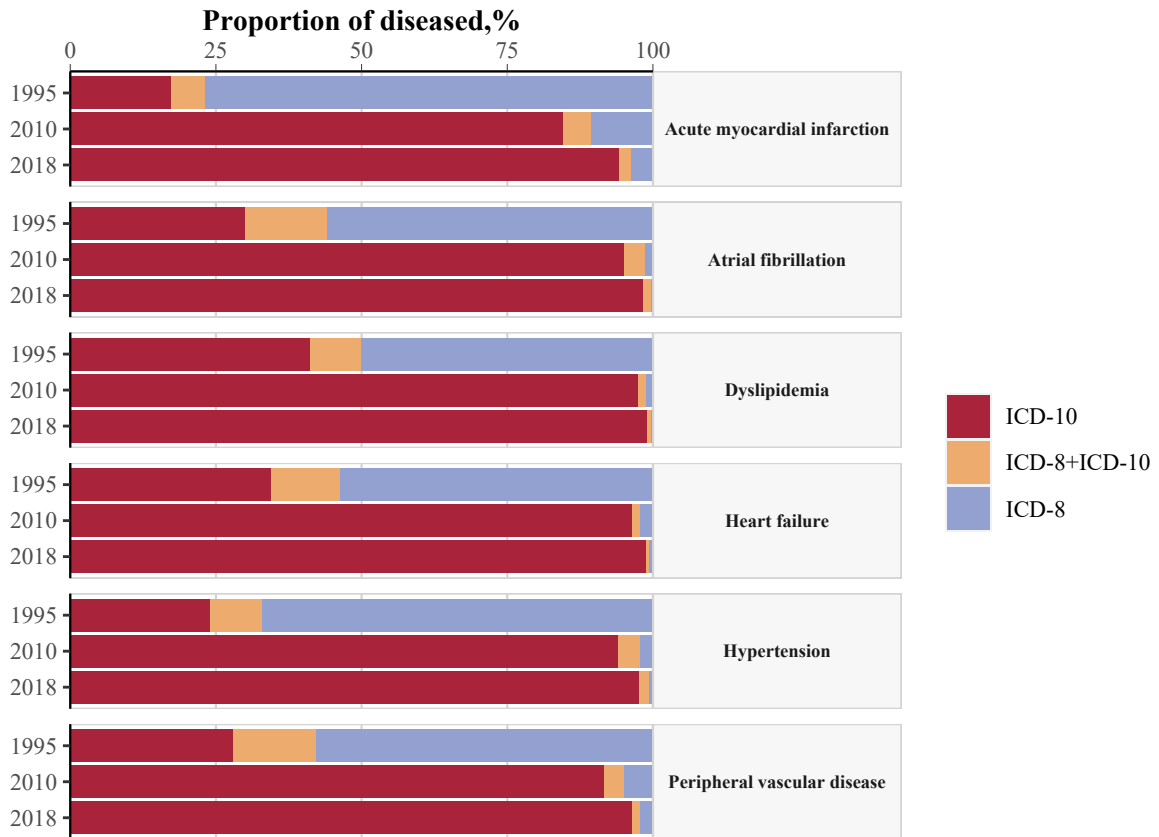

**Figure S3. Endocrine diseases.**

Proportion of persons identified with ICD-10 codes only, ICD-8 and ICD-10 codes, or ICD-8 codes only. Grouped by diseases and sample year.

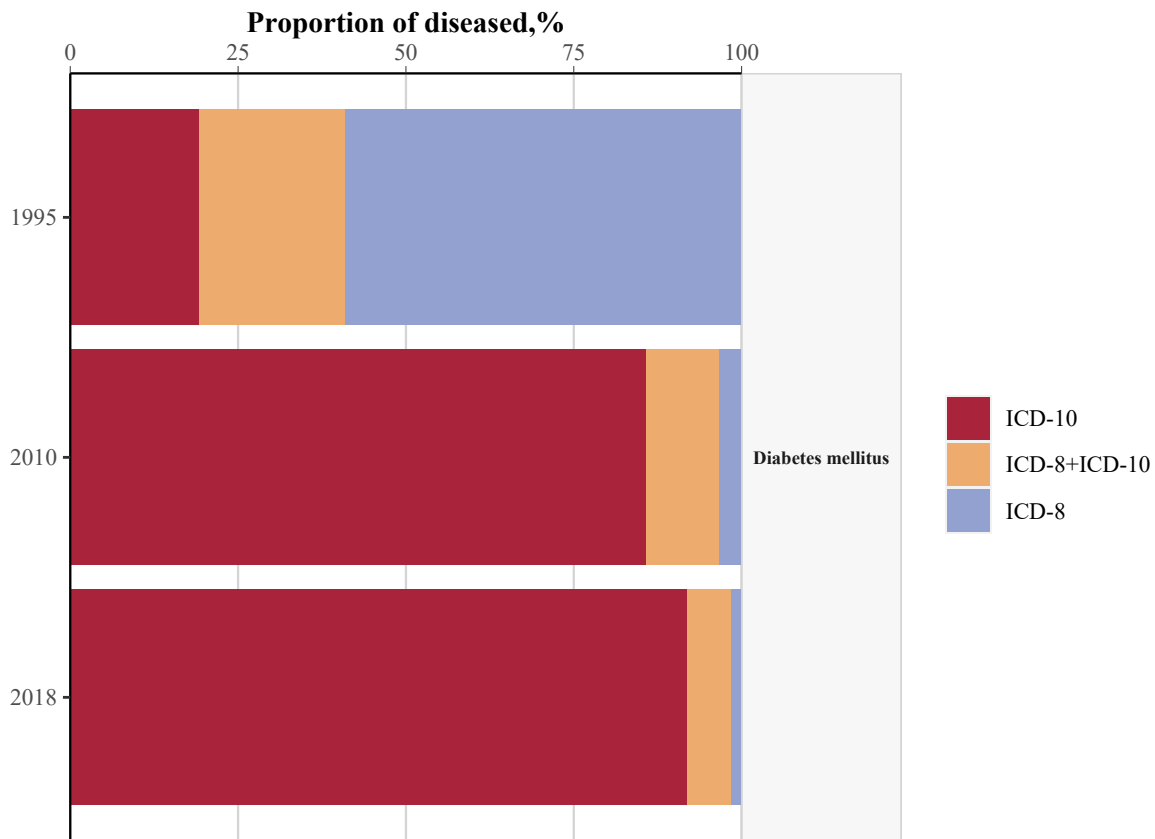

**Figure S4. Gastrointestinal diseases.**

Proportion of persons identified with ICD-10 codes only, ICD-8 and ICD-10 codes, or ICD-8 codes only. Grouped by diseases and sample year.

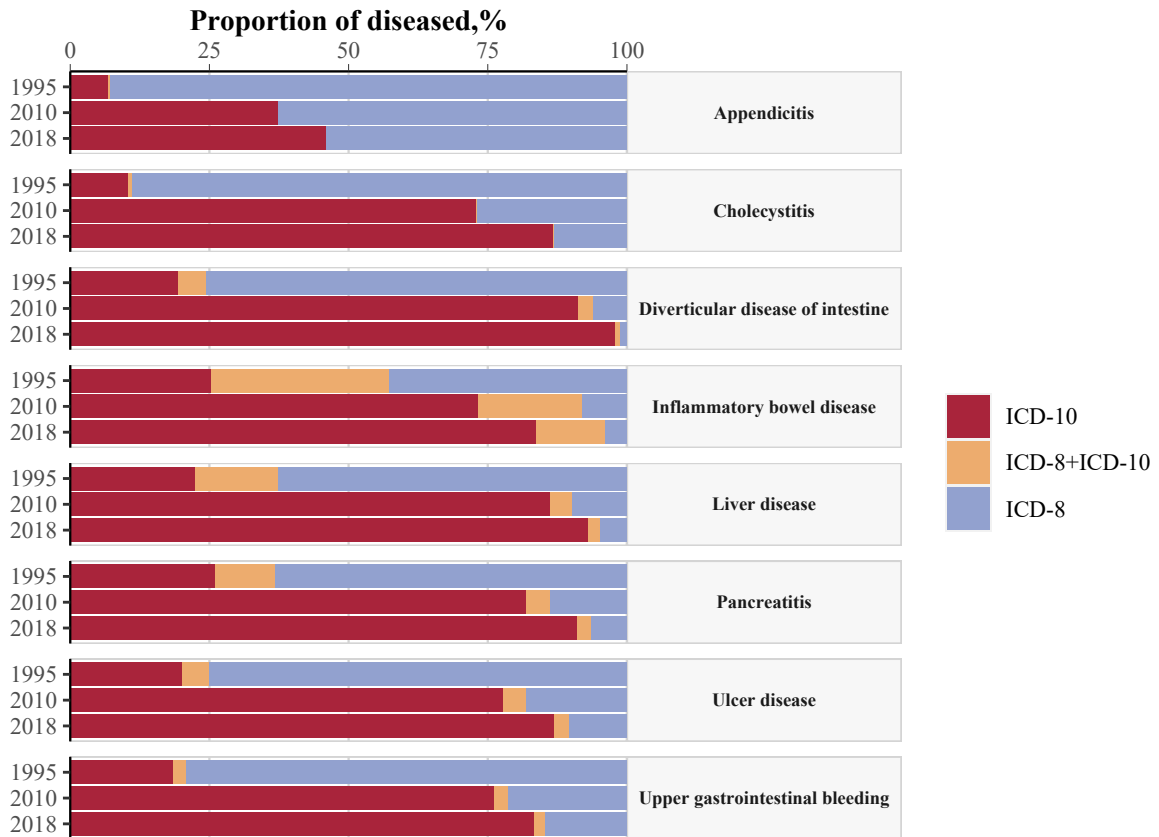

**Figure S5. Neurological diseases.**

Proportion of persons identified with ICD-10 codes only, ICD-8 and ICD-10 codes, or ICD-8 codes only. Grouped by diseases and sample year.

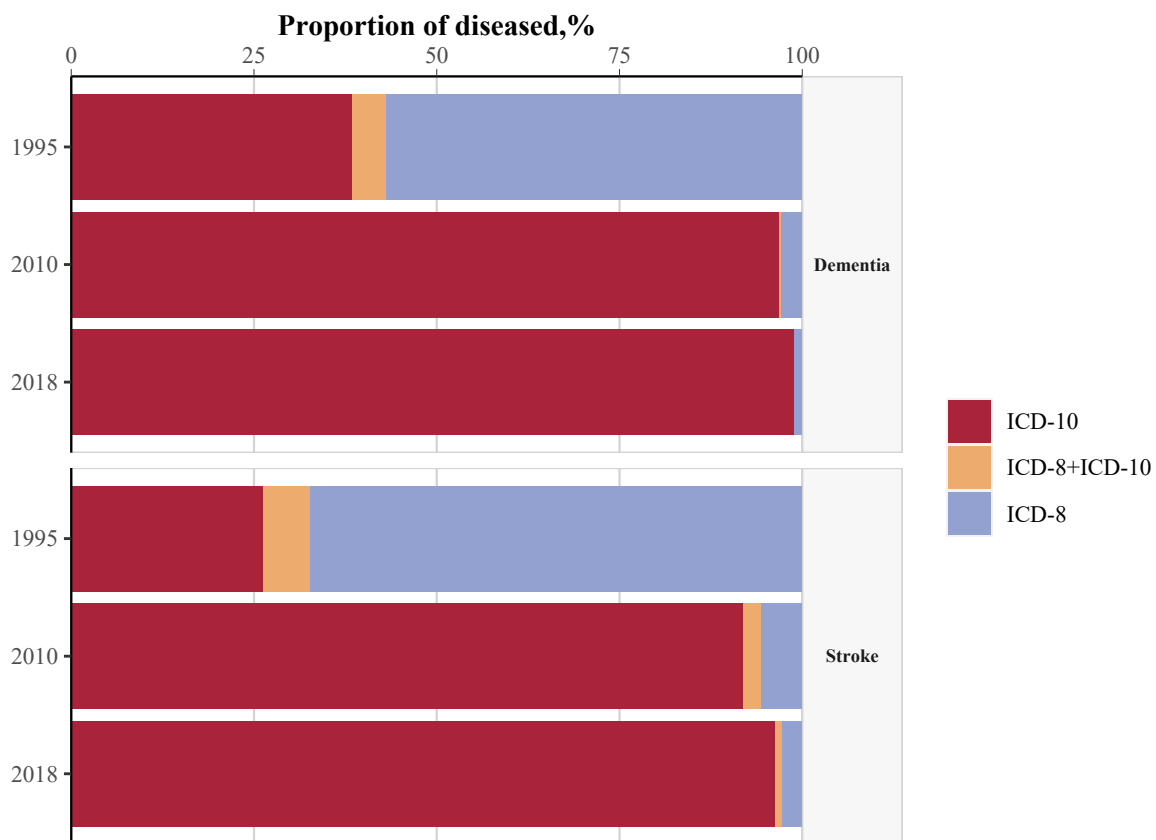

**Figure S6. Fractures.**

Proportion of persons identified with ICD-10 codes only, ICD-8 and ICD-10 codes, or ICD-8 codes only. Grouped by diseases and sample year.

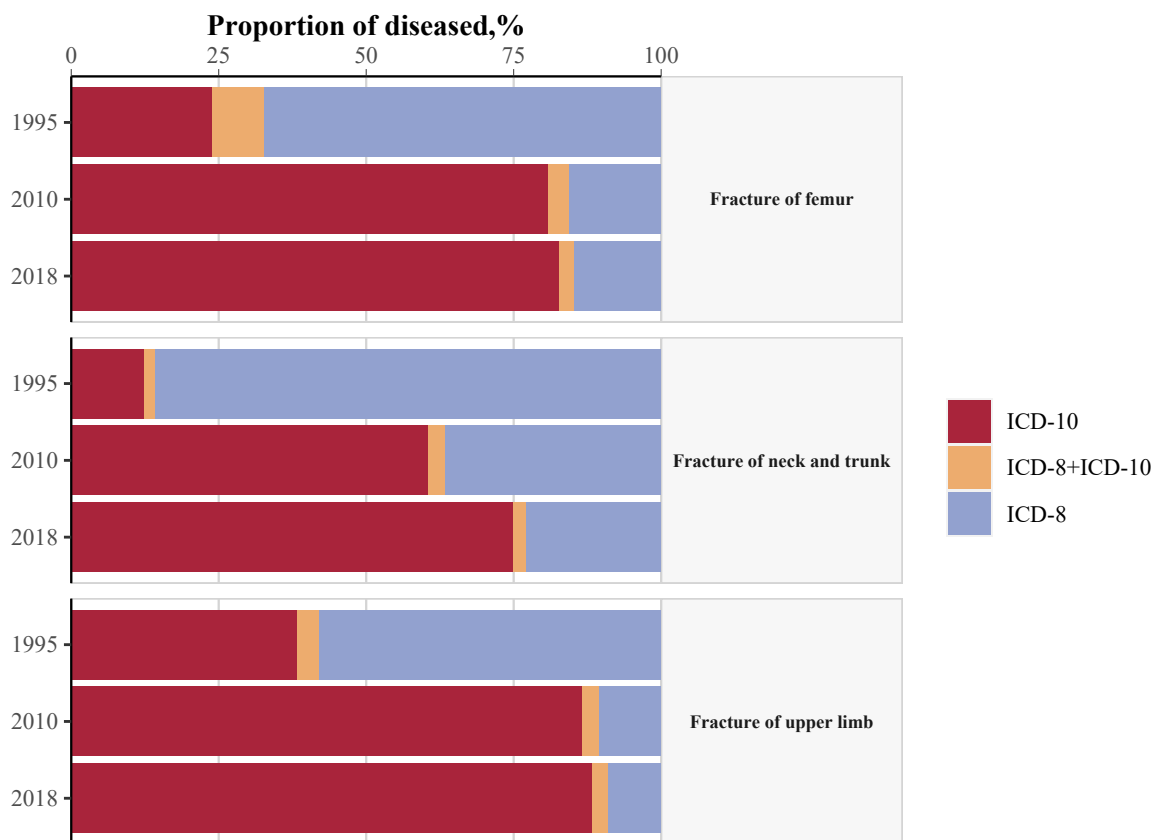

**Figure S7. Pulmonary diseases.**

Proportion of persons identified with ICD-10 codes only, ICD-8 and ICD-10 codes, or ICD-8 codes only. Grouped by diseases and sample year.

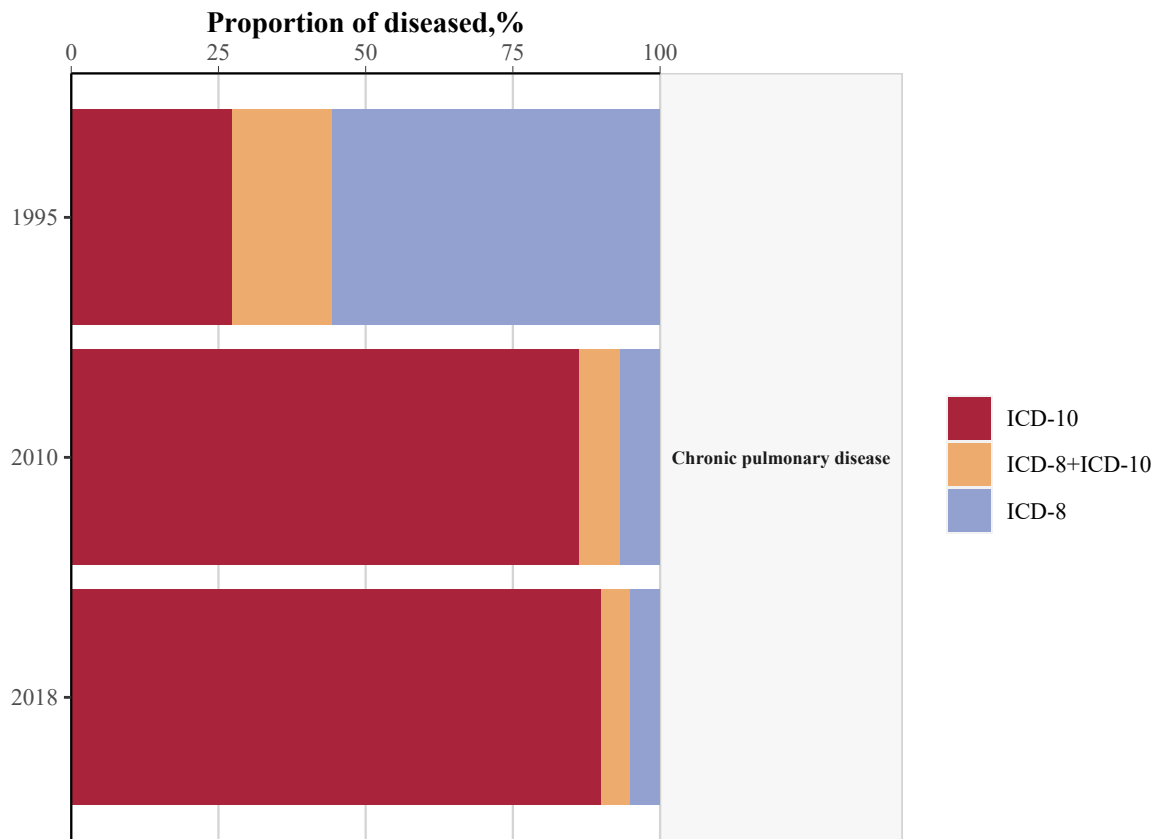

**Figure S8. Rheumatic diseases.**

Proportion of persons identified with ICD-10 codes only, ICD-8 and ICD-10 codes, or ICD-8 codes only. Grouped by diseases and sample year.

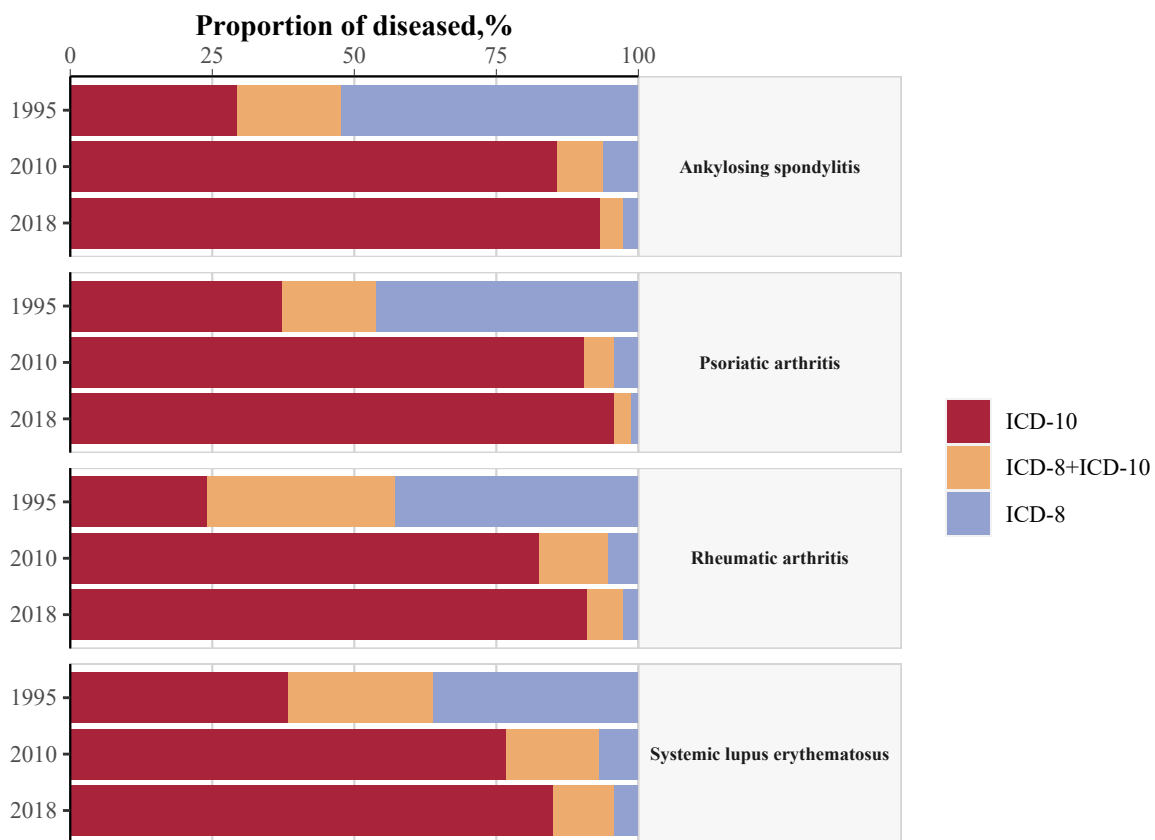



**Figure S9. Urogenital diseases.**

Proportion of persons identified with ICD-10 codes only, ICD-8 and ICD-10 codes, or ICD-8 codes only. Grouped by diseases and sample year.

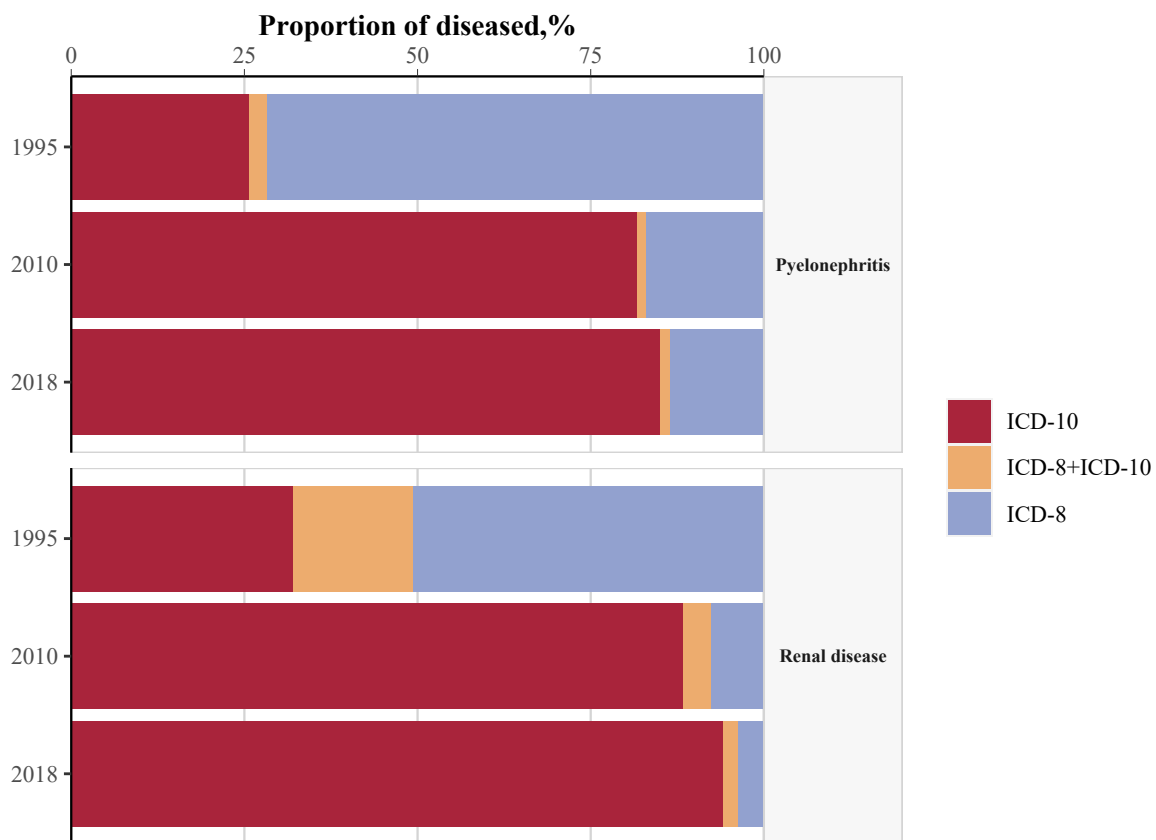

## Stratified by age groups

Figure S10–S15. Cardiovascular diseases.

**Figure S10. Acute myocardial infarction.** Proportion of persons identified with ICD-10 codes only, ICD-8 and ICD-10 codes, or ICD-8 codes only. Grouped by age group and sample year.

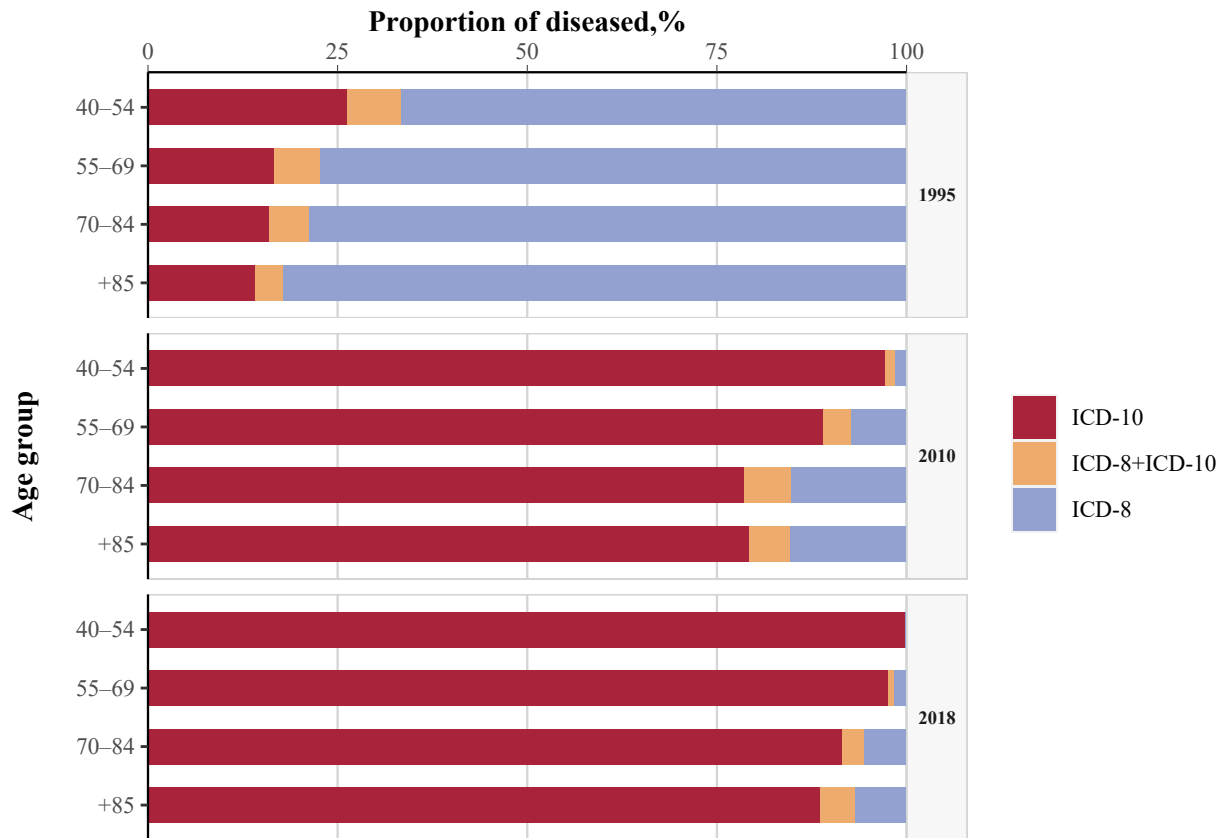

**Figure S11. Atrial fibrillation.** Proportion of persons identified with ICD-10 codes only, ICD-8 and ICD-10 codes, or ICD-8 codes only. Grouped by age group and sample year.

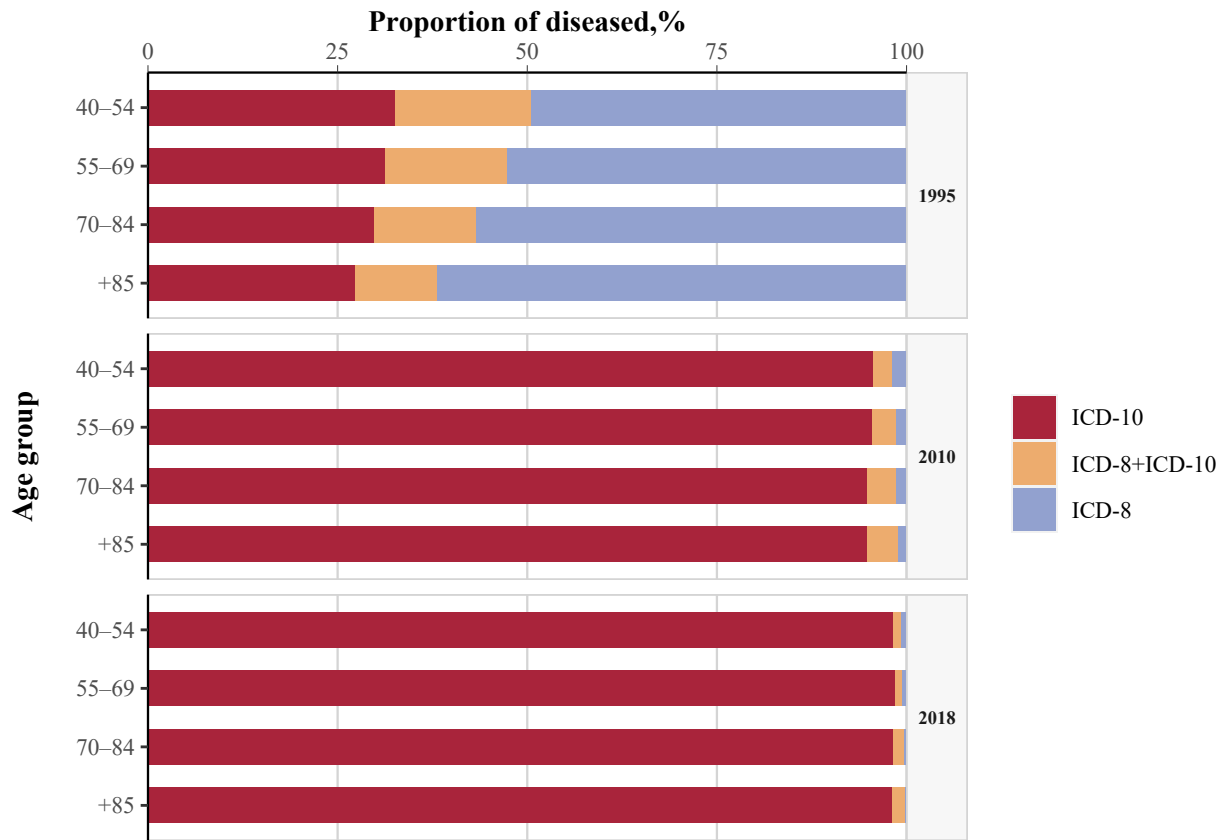

**Figure S12. Dyslipidemia.** Proportion of persons identified with ICD-10 codes only, ICD-8 and ICD-10 codes, or ICD-8 codes only. Grouped by age group and sample year.

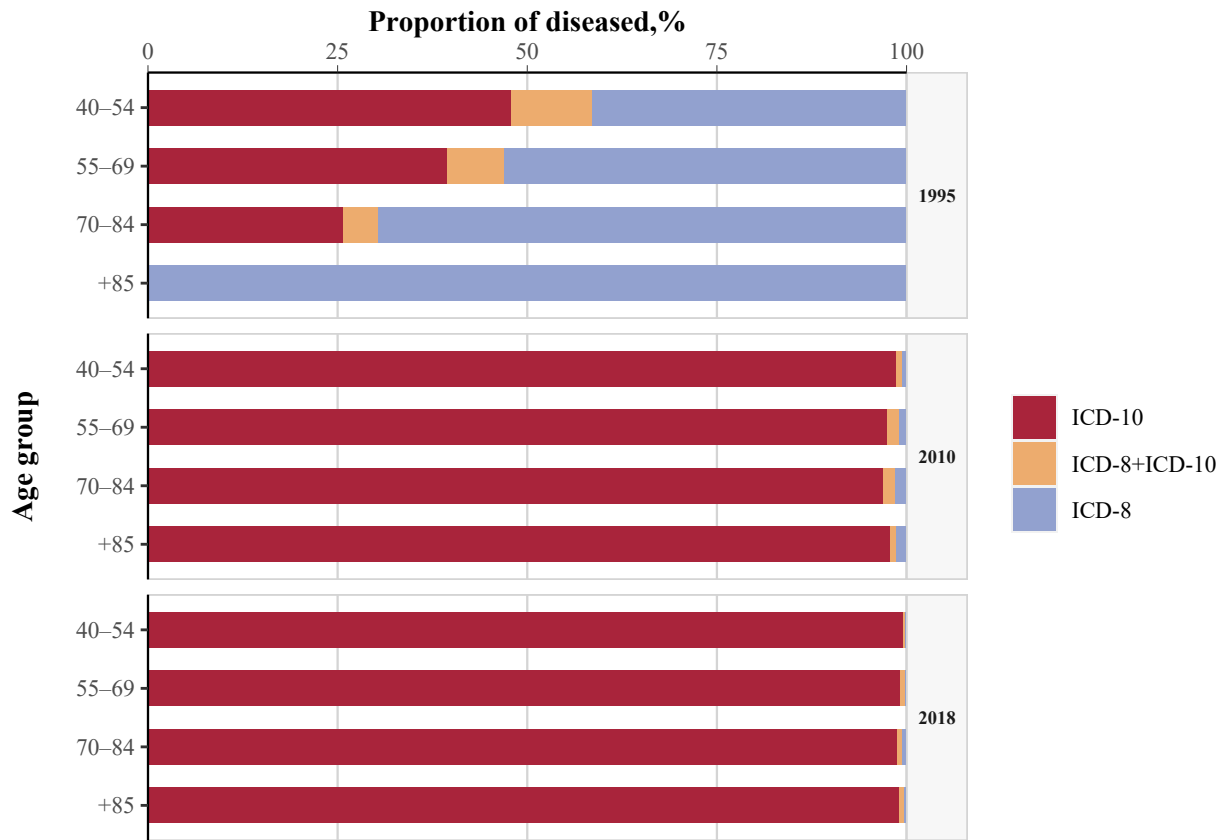

**Figure S13. Heart failure.** Proportion of persons identified with ICD-10 codes only, ICD-8 and ICD-10 codes, or ICD-8 codes only. Grouped by age group and sample year.

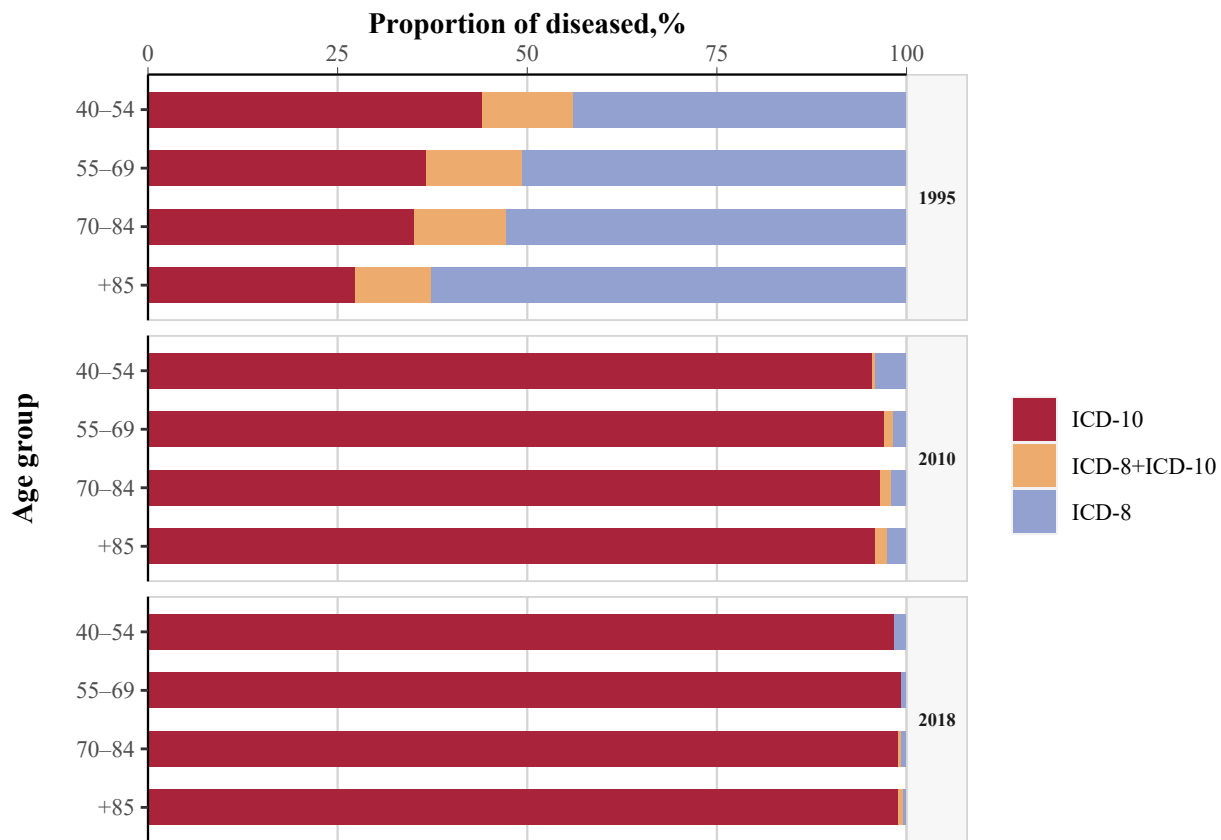

**Figure S14. Hypertension.** Proportion of persons identified with ICD-10 codes only, ICD-8 and ICD-10 codes, or ICD-8 codes only. Grouped by age group and sample year.

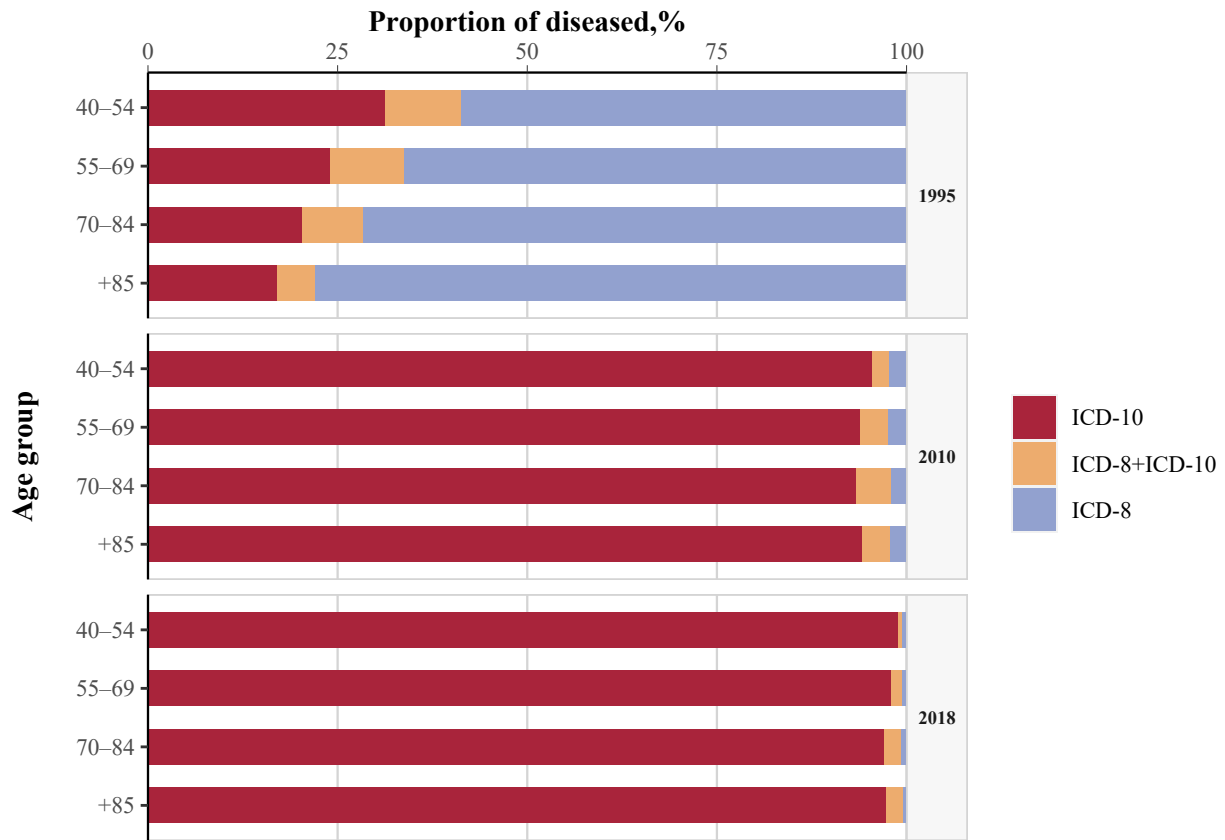

**Figure S15. Peripheral vascular disease.** Proportion of persons identified with ICD-10 codes only, ICD-8 and ICD-10 codes, or ICD-8 codes only. Grouped by age group and sample year.

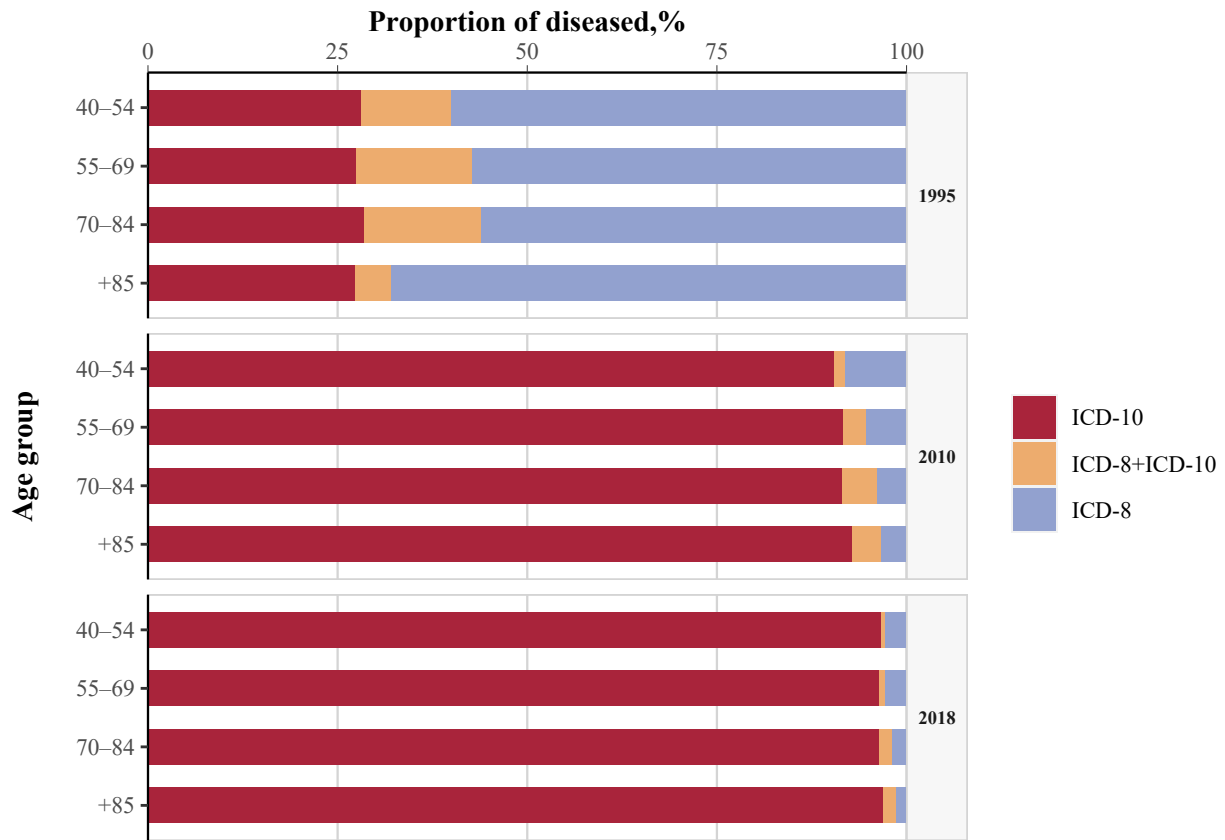

**Figure S16. Endocrine diseases.**

**Figure S16. Diabetes mellitus.** Proportion of persons identified with ICD-10 codes only, ICD-8 and ICD-10 codes, or ICD-8 codes only. Grouped by age group and sample year.

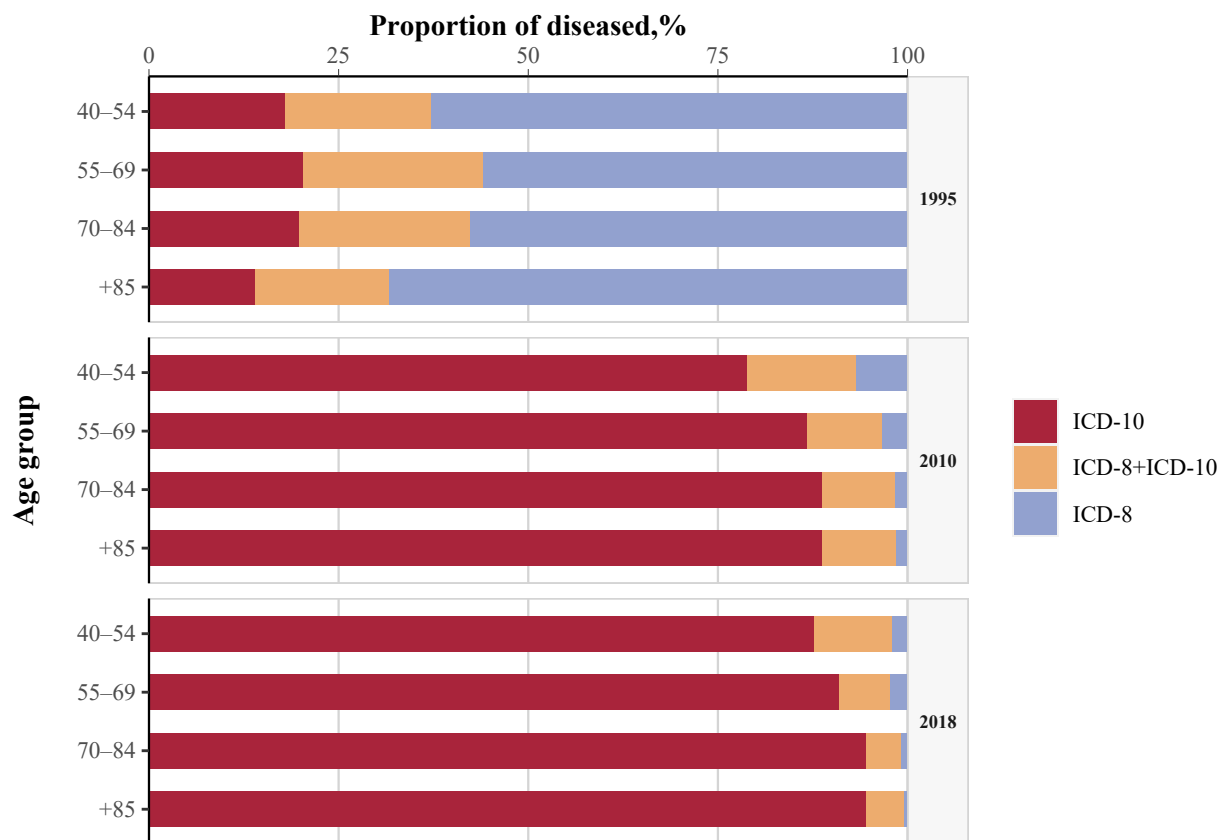



**Figure S17–S24. Gastrointestinal diseases.**

**Figure S17. Appendicitis.** Proportion of persons identified with ICD-10 codes only, ICD-8 and ICD-10 codes, or ICD-8 codes only. Grouped by age group and sample year.

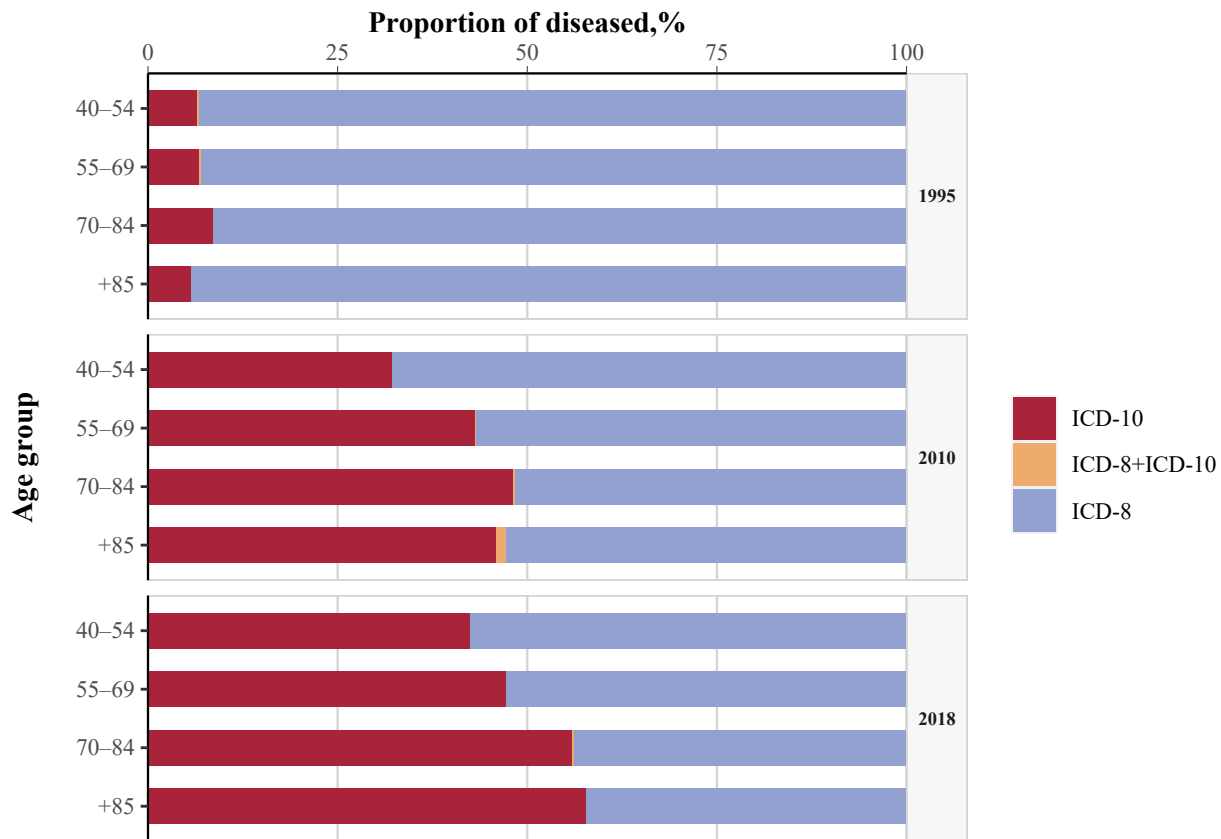

**Figure S18. Cholecystitis.** Proportion of persons identified with ICD-10 codes only, ICD-8 and ICD-10 codes, or ICD-8 codes only. Grouped by age group and sample year.

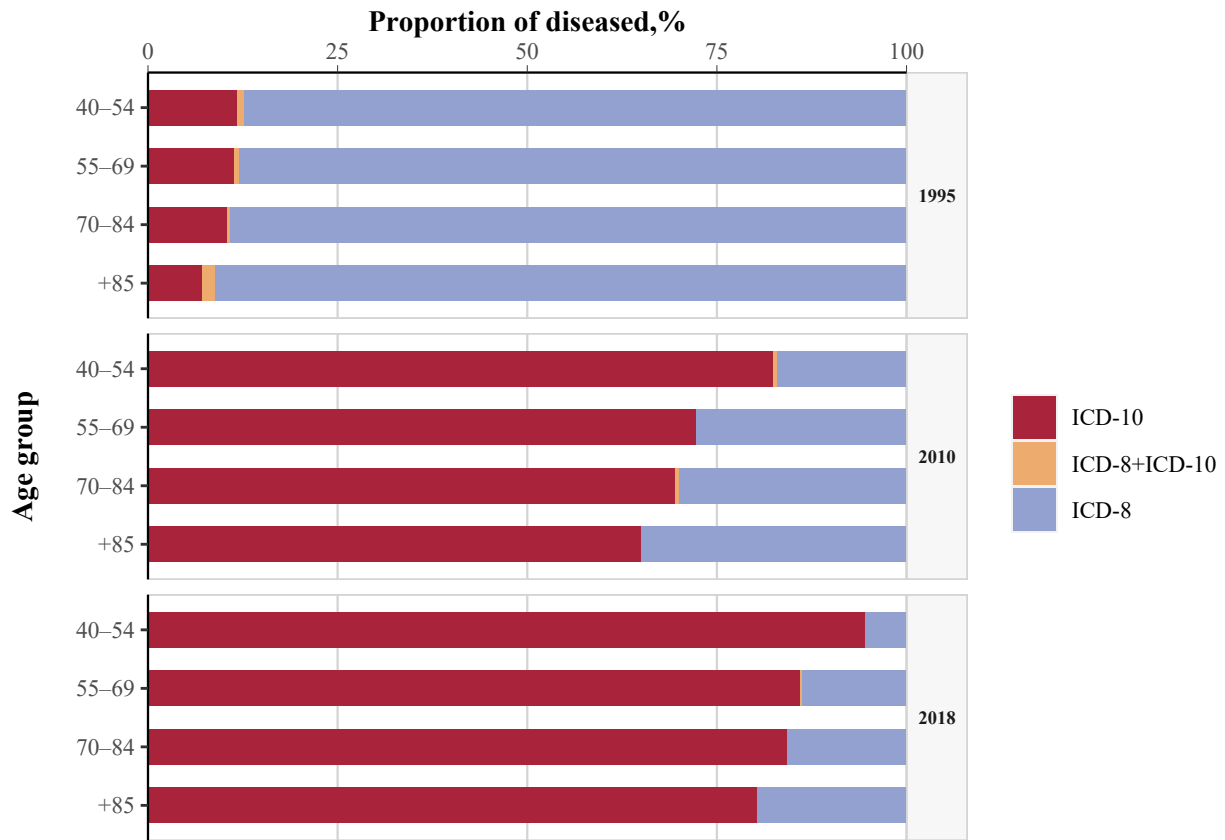

**Figure S19. Diverticular disease of intestine.** Proportion of persons identified with ICD-10 codes only, ICD-8 and ICD-10 codes, or ICD-8 codes only. Grouped by age group and sample year.

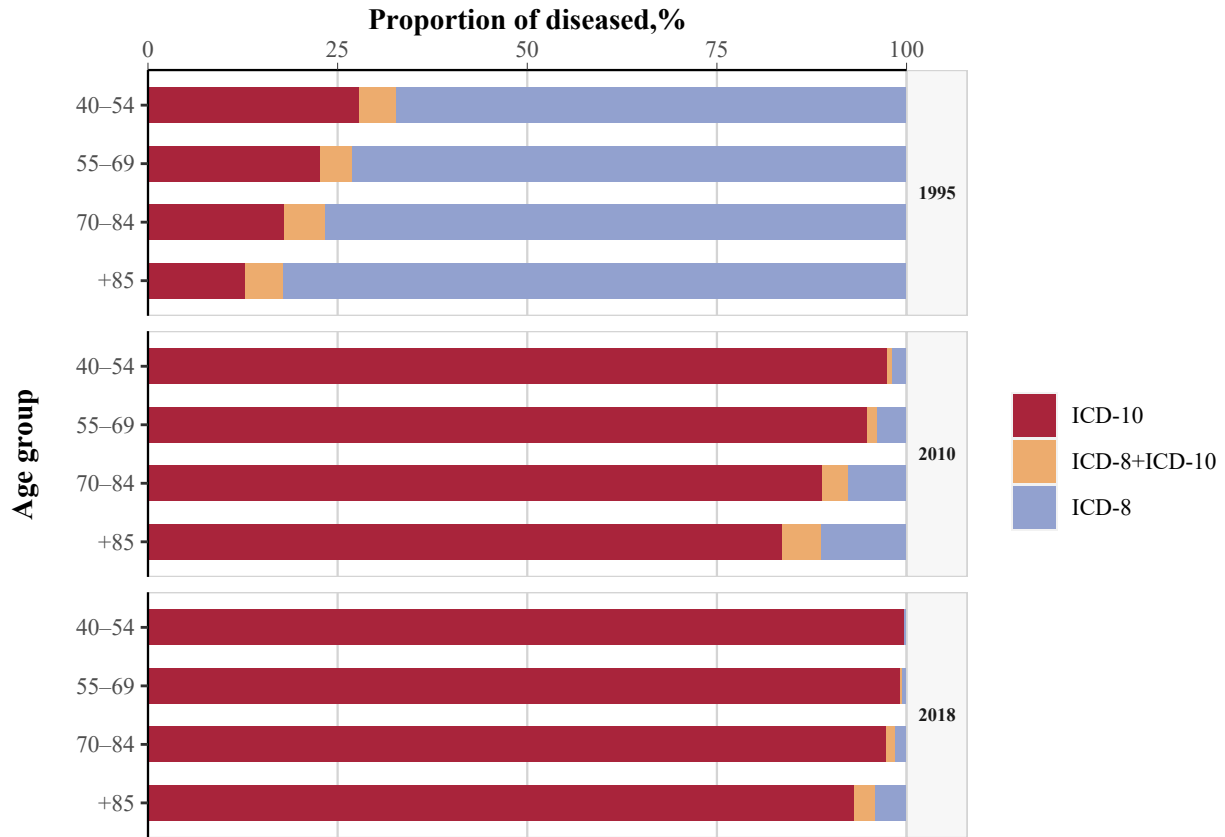

**Figure S20. Inflammatory bowel disease.** Proportion of persons identified with ICD-10 codes only, ICD-8 and ICD-10 codes, or ICD-8 codes only. Grouped by age group and sample year.

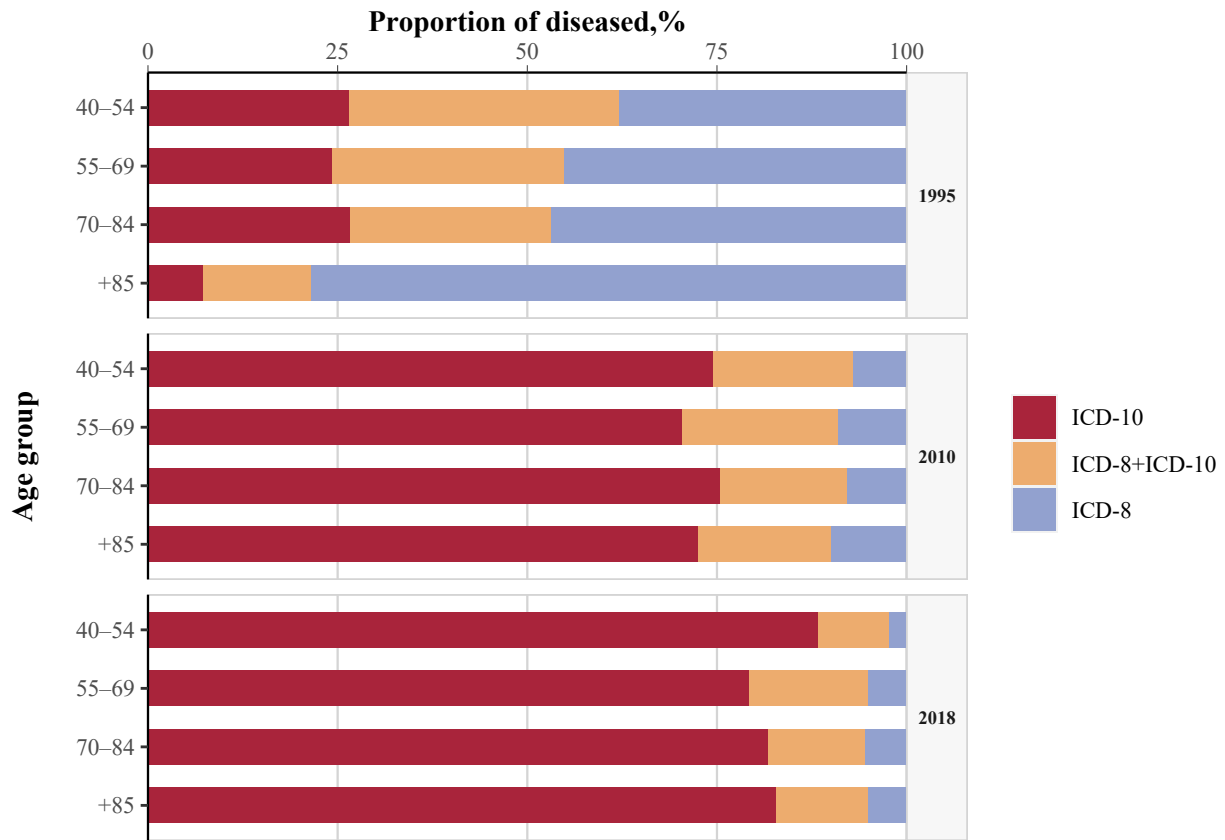

**Figure S21. Liver disease.** Proportion of persons identified with ICD-10 codes only, ICD-8 and ICD-10 codes, or ICD-8 codes only. Grouped by age group and sample year.

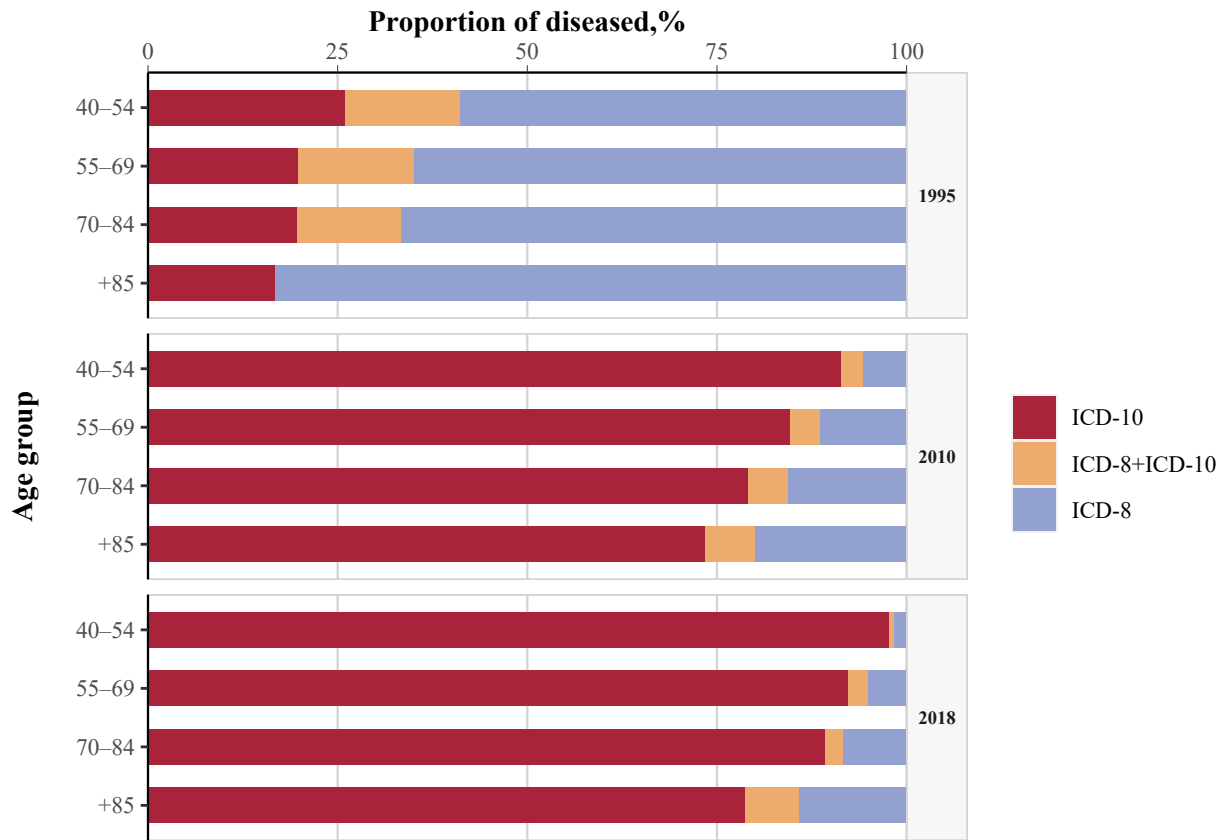

**Figure S22. Pancreatitis.** Proportion of persons identified with ICD-10 codes only, ICD-8 and ICD-10 codes, or ICD-8 codes only. Grouped by age group and sample year.

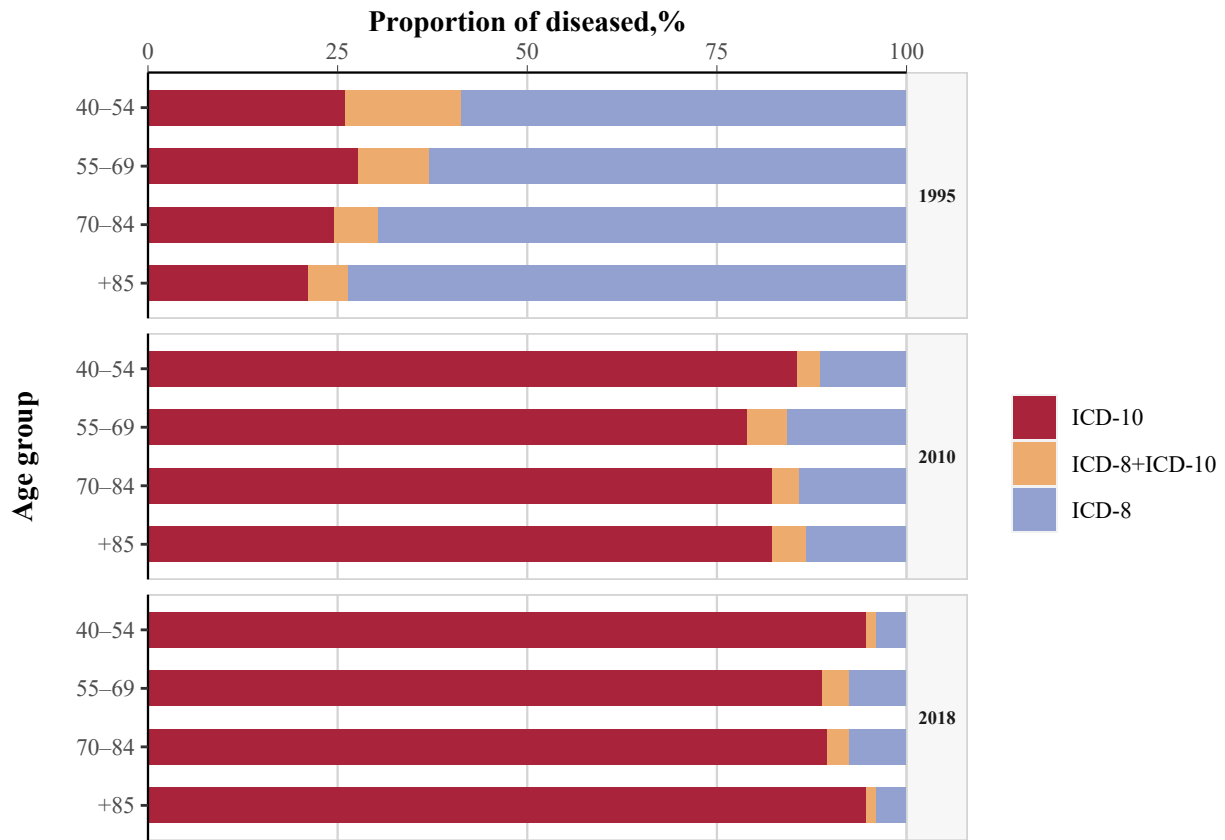

**Figure S23. Ulcer disease.** Proportion of persons identified with ICD-10 codes only, ICD-8 and ICD-10 codes, or ICD-8 codes only. Grouped by age group and sample year.

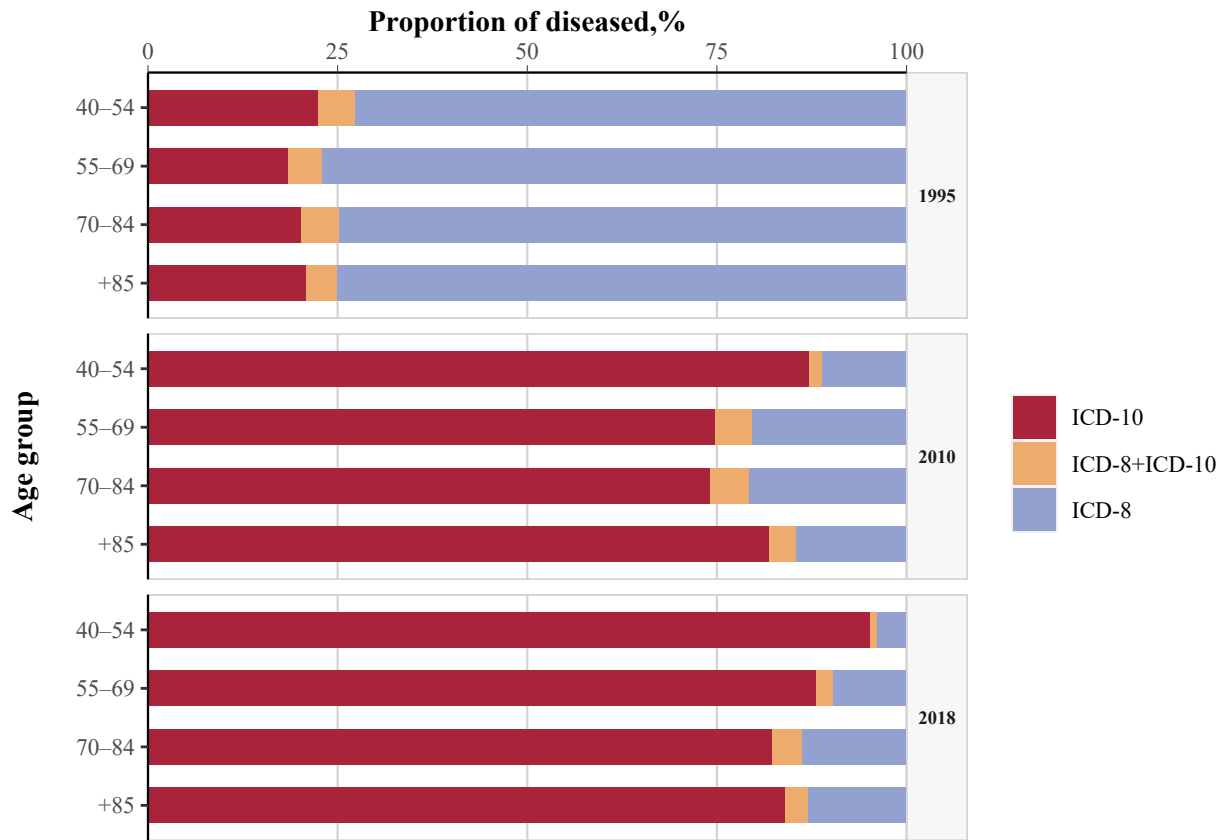

**Figure S24. Upper gastrointestinal bleeding.** Proportion of persons identified with ICD-10 codes only, ICD-8 and ICD-10 codes, or ICD-8 codes only. Grouped by age group and sample year.

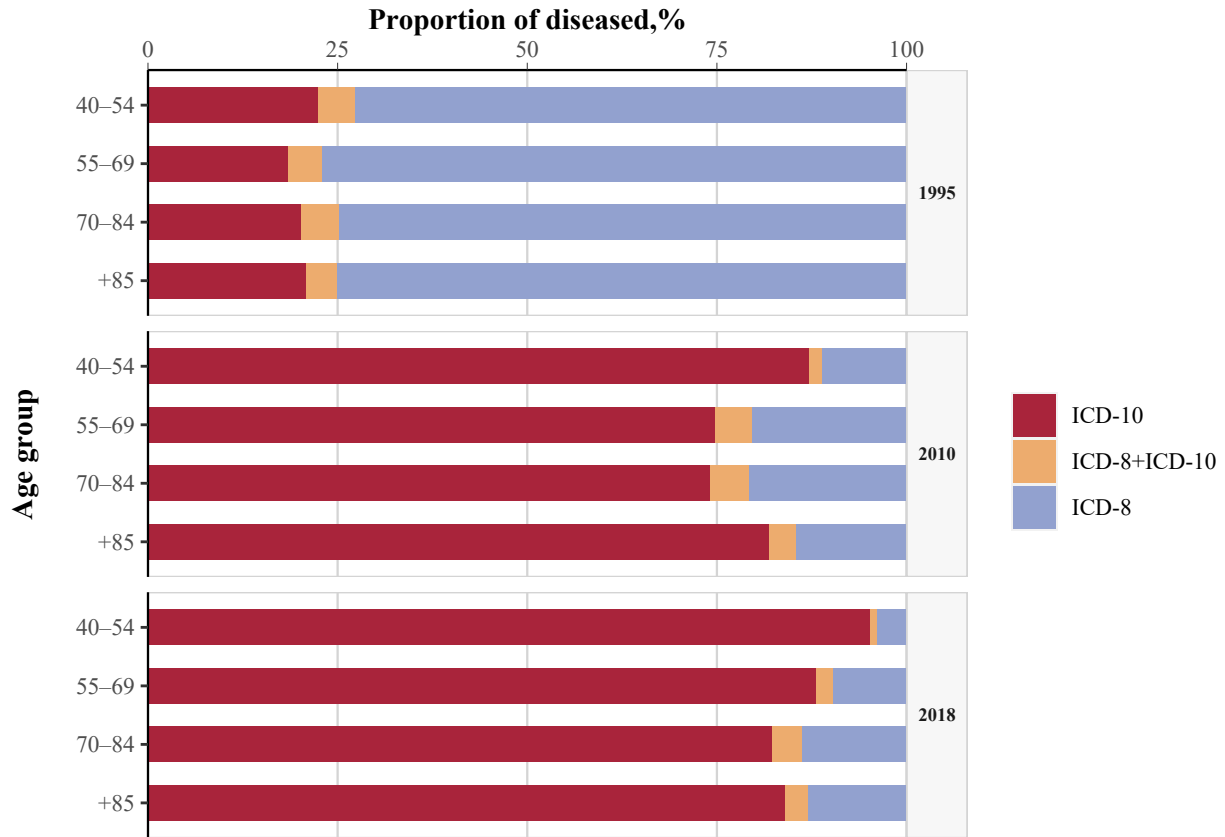



**Figure S25–26. Neurological diseases.**

**Figure S25. Dementia.** Proportion of persons identified with ICD-10 codes only, ICD-8 and ICD-10 codes, or ICD-8 codes only. Grouped by age group and sample year.

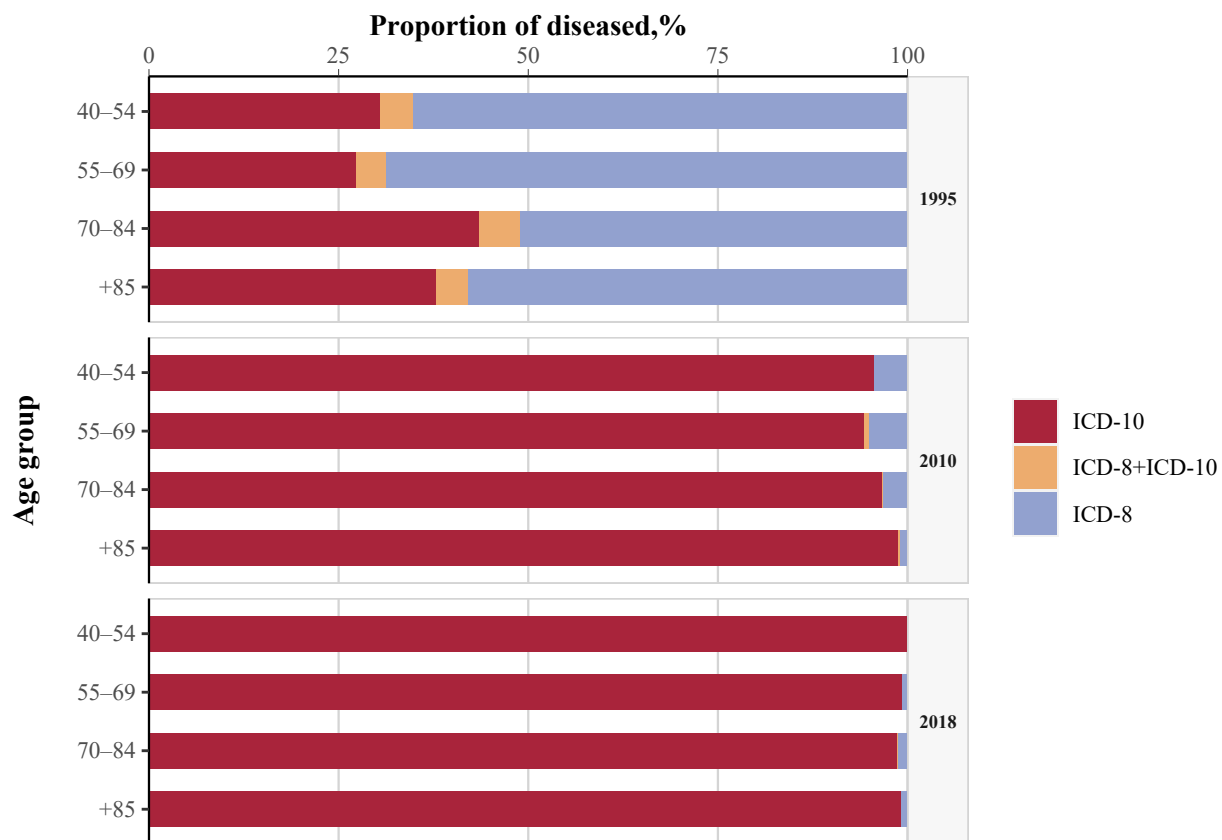

**Figure S26. Stroke.** Proportion of persons identified with ICD-10 codes only, ICD-8 and ICD-10 codes, or ICD-8 codes only. Grouped by age group and sample year.

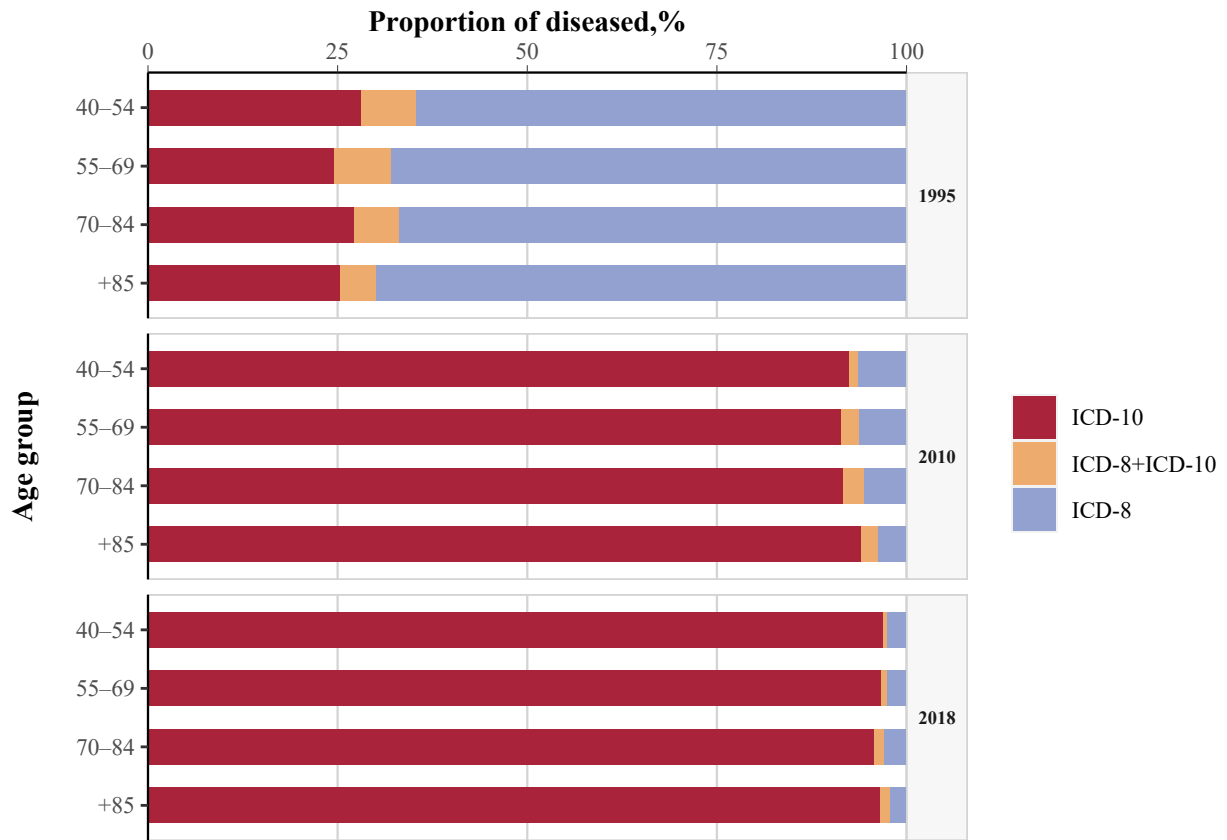

**Figure S27–S29. Fractures.**

**Figure S27. Fracture of femur.** Proportion of persons identified with ICD-10 codes only, ICD-8 and ICD-10 codes, or ICD-8 codes only. Grouped by age group and sample year.

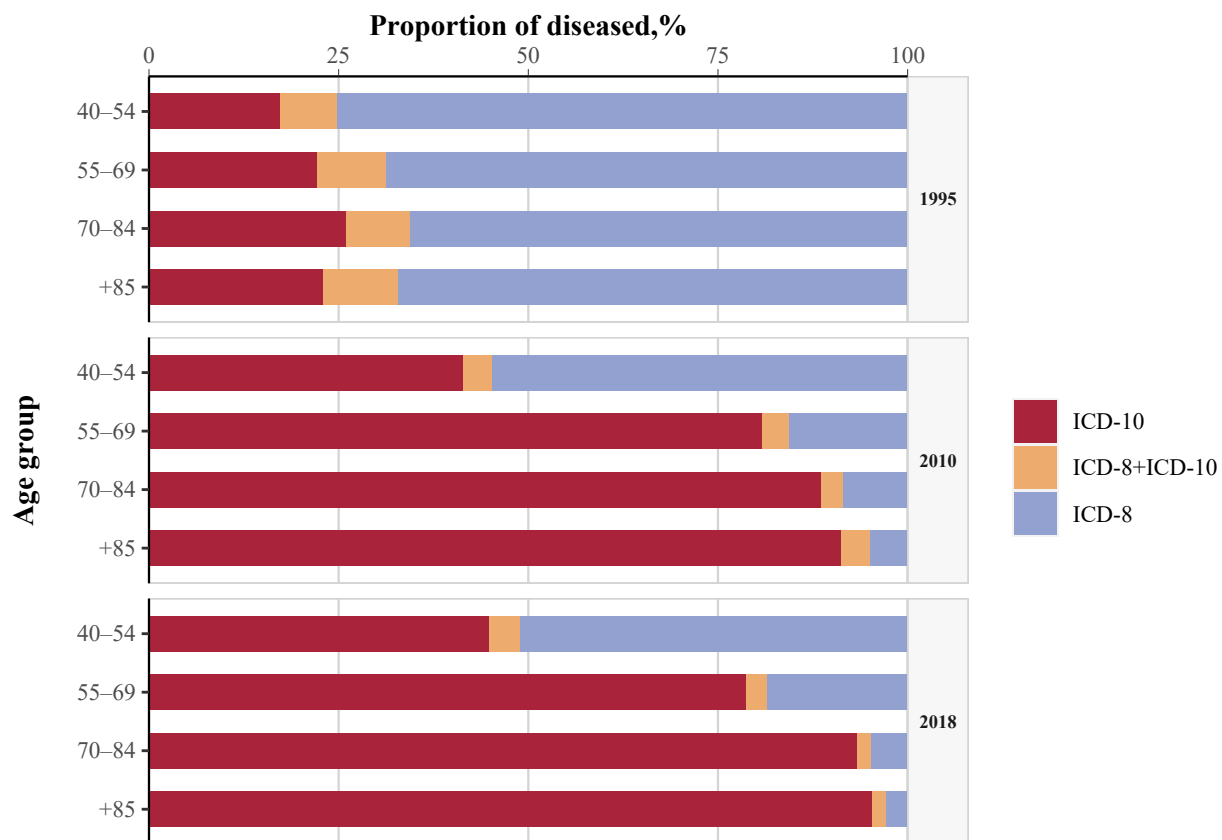

**Figure S28. Fracture of neck and trunk.** Proportion of persons identified with ICD-10 codes only, ICD-8 and ICD-10 codes, or ICD-8 codes only. Grouped by age group and sample year.

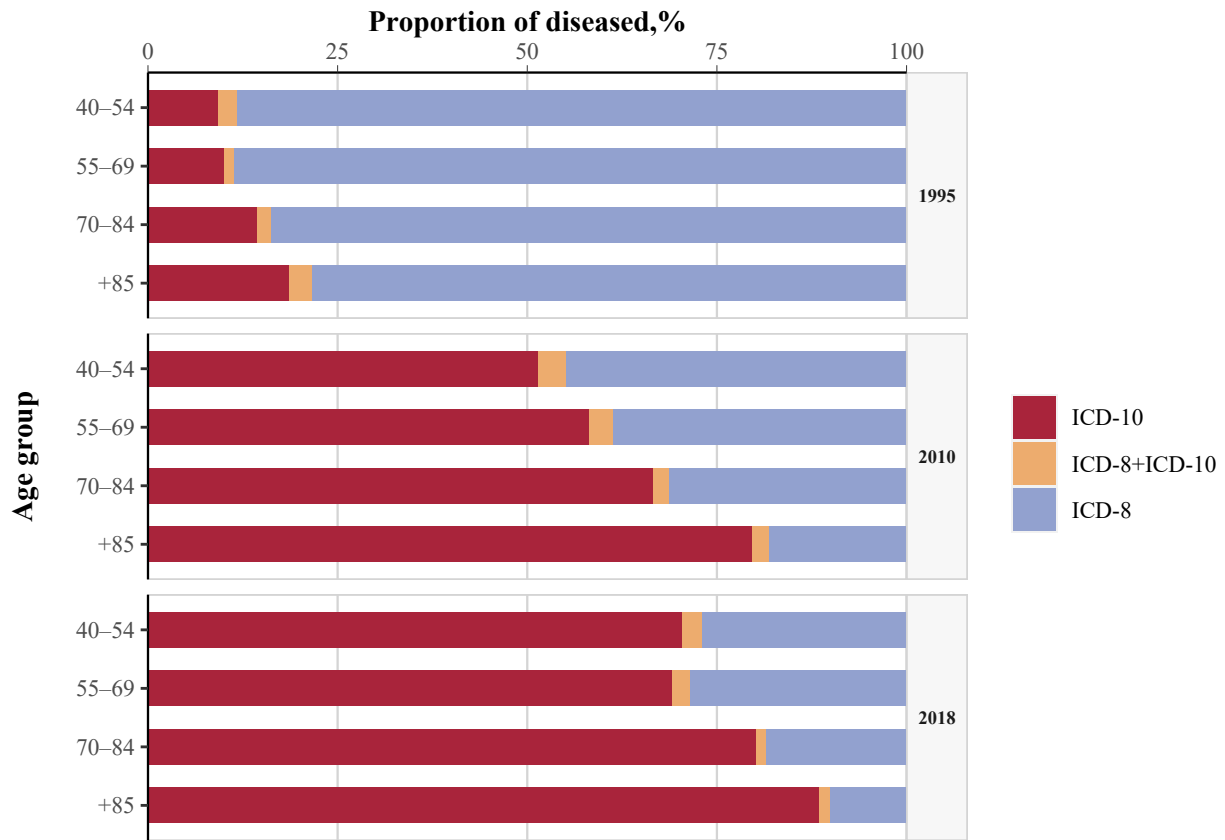

**Figure S29. Fracture of upper limb.** Proportion of persons identified with ICD-10 codes only, ICD-8 and ICD-10 codes, or ICD-8 codes only. Grouped by age group and sample year.

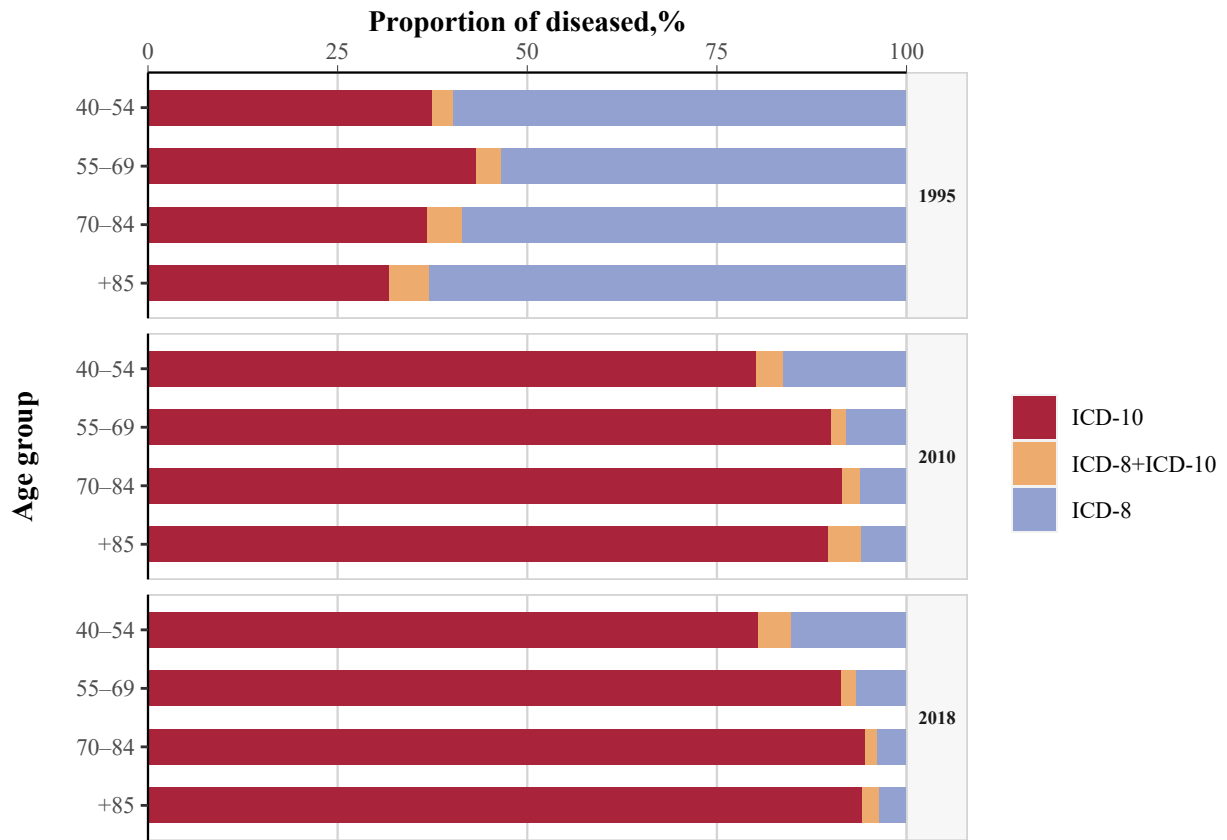

**Figure S30. Pulmonary diseases.**

**Figure S30. Chronic pulmonary disease.** Proportion of persons identified with ICD-10 codes only, ICD-8 and ICD-10 codes, or ICD-8 codes only. Grouped by age group and sample year.

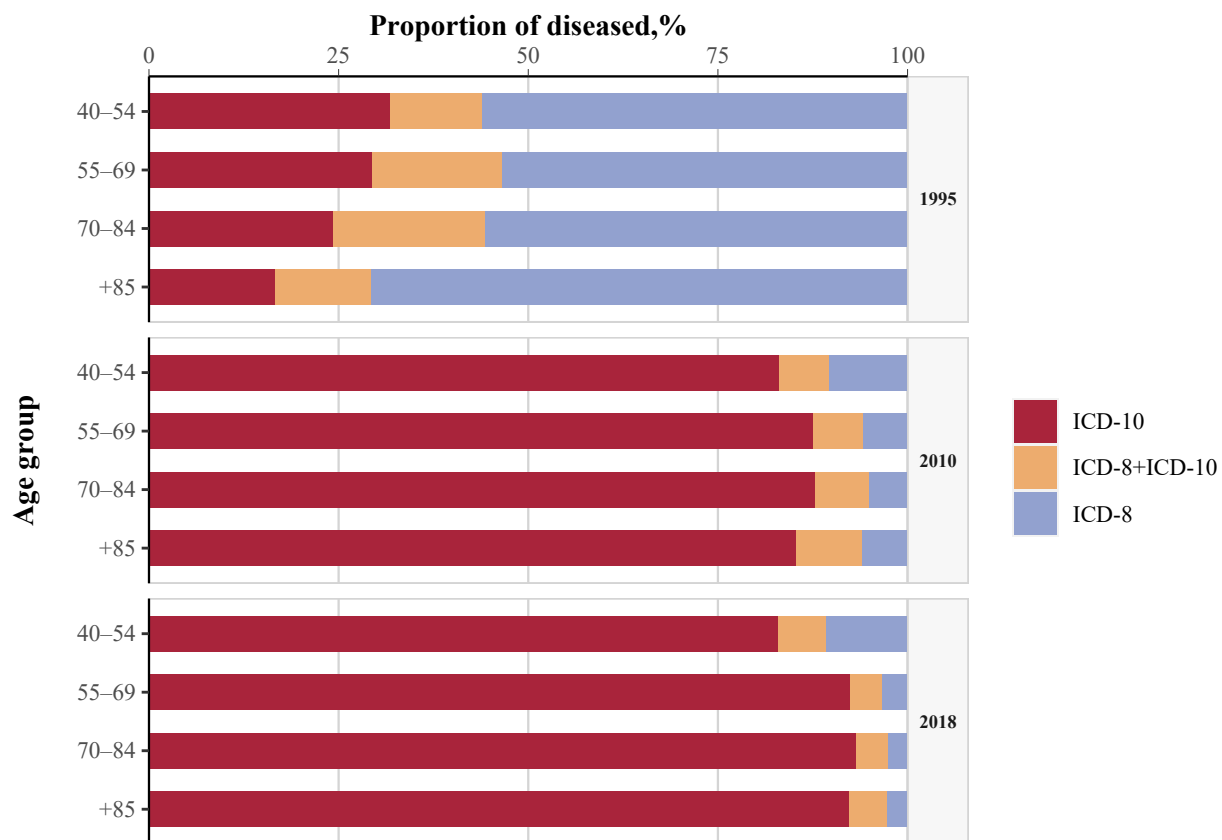

**Figure S31–34. Rheumatic diseases.**

**Figure S31. Ankylosing spondylitis.** Proportion of persons identified with ICD-10 codes only, ICD-8 and ICD-10 codes, or ICD-8 codes only. Grouped by age group and sample year.

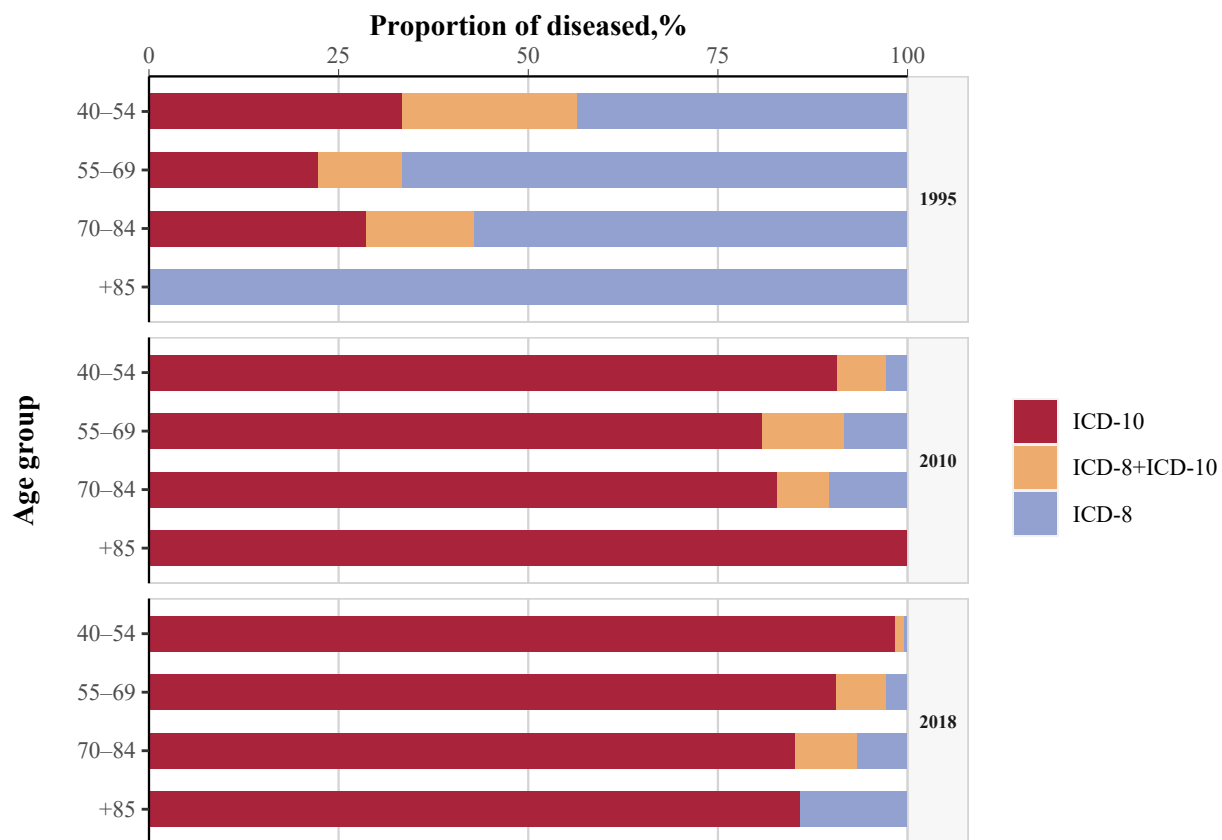

**Figure S32. Systemic lupus erythematosus.** Proportion of persons identified with ICD-10 codes only, ICD-8 and ICD-10 codes, or ICD-8 codes only. Grouped by age group and sample year.

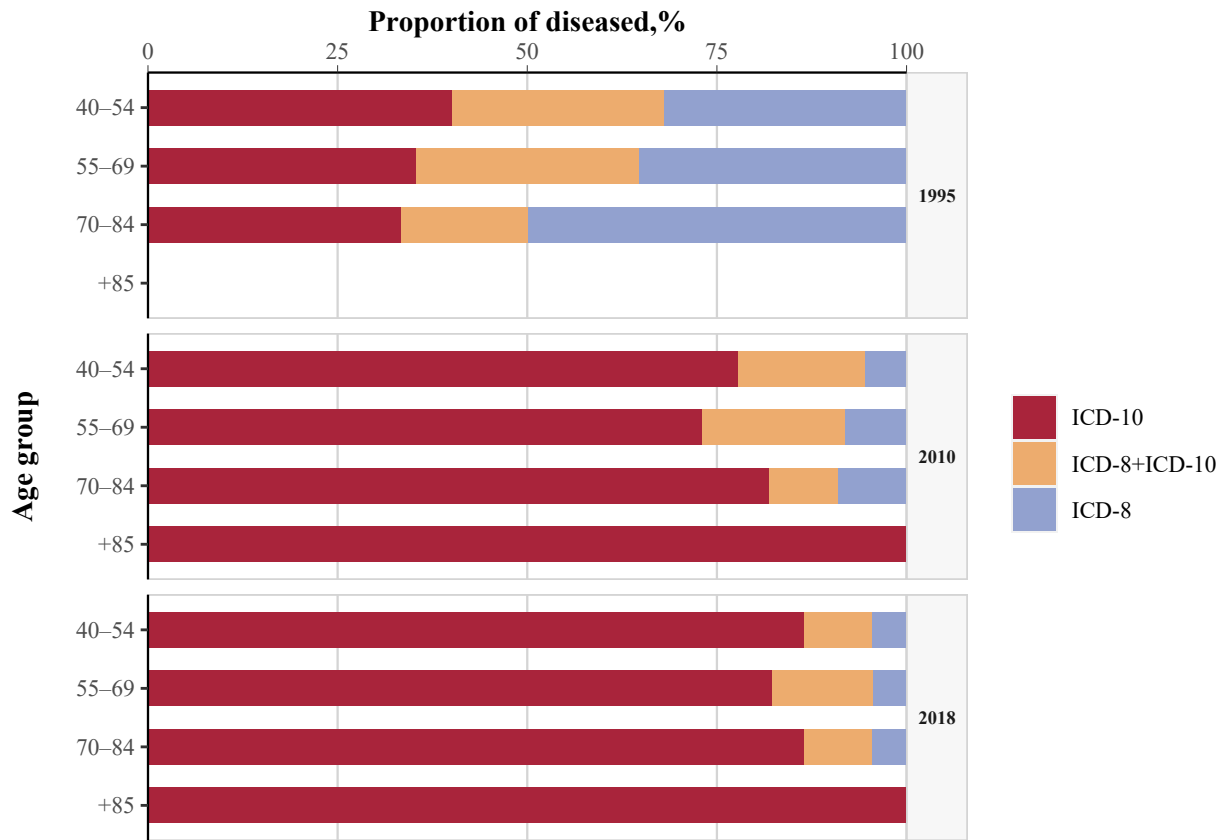



**Figure S33. Psoriatic arthritis.** Proportion of persons identified with ICD-10 codes only, ICD-8 and ICD-10 codes, or ICD-8 codes only. Grouped by age group and sample year.

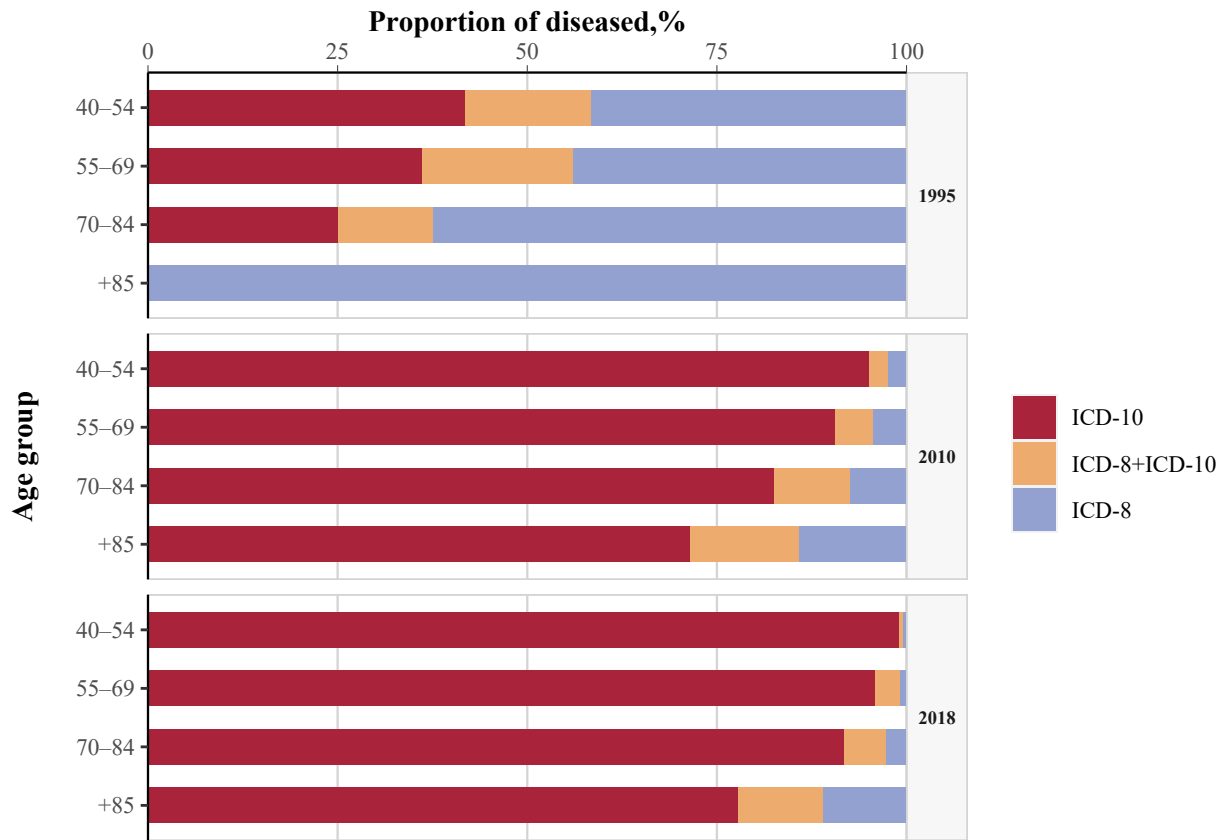

**Figure S34. Rheumatic arthritis.** Proportion of persons identified with ICD-10 codes only, ICD-8 and ICD-10 codes, or ICD-8 codes only. Grouped by age group and sample year.

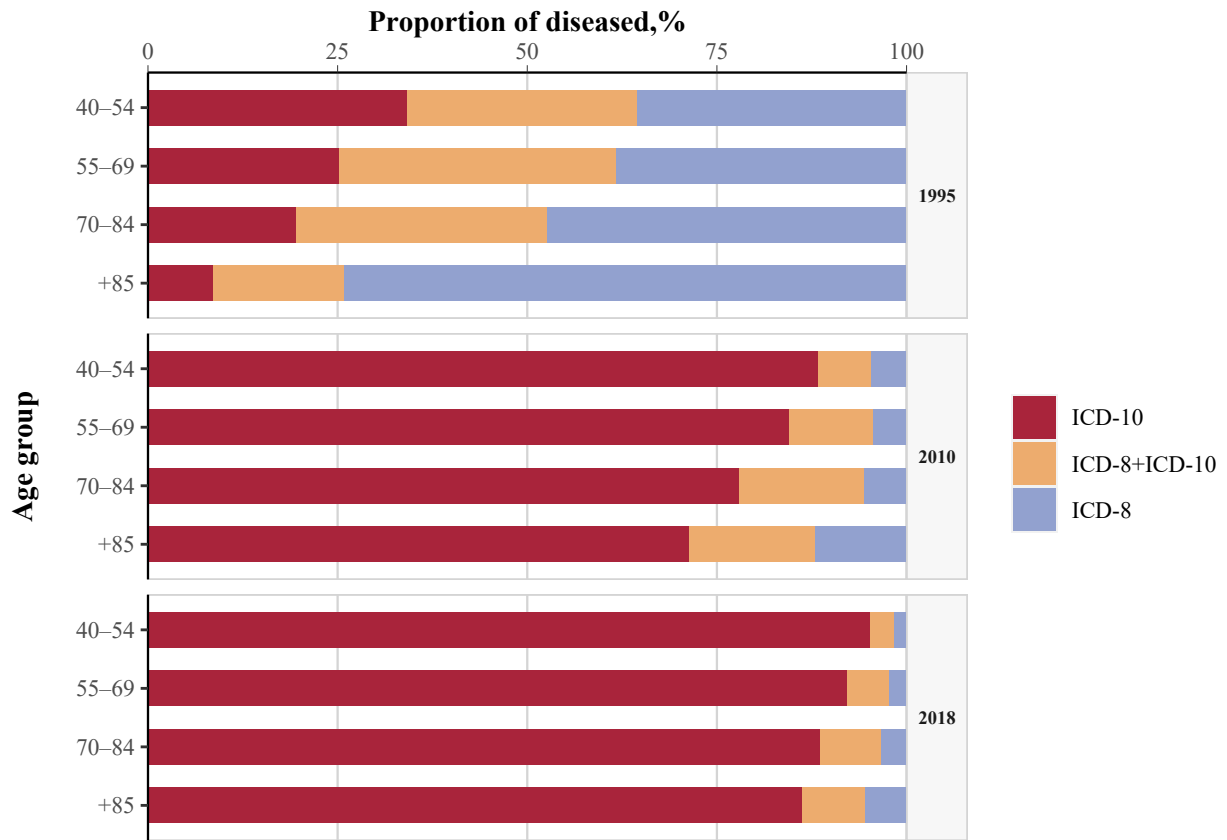

**Figure S35–S36. Urogenital diseases.**

**Figure S35. Pyelonephritis.** Proportion of persons identified with ICD-10 codes only, ICD-8 and ICD-10 codes, or ICD-8 codes only. Grouped by age group and sample year.

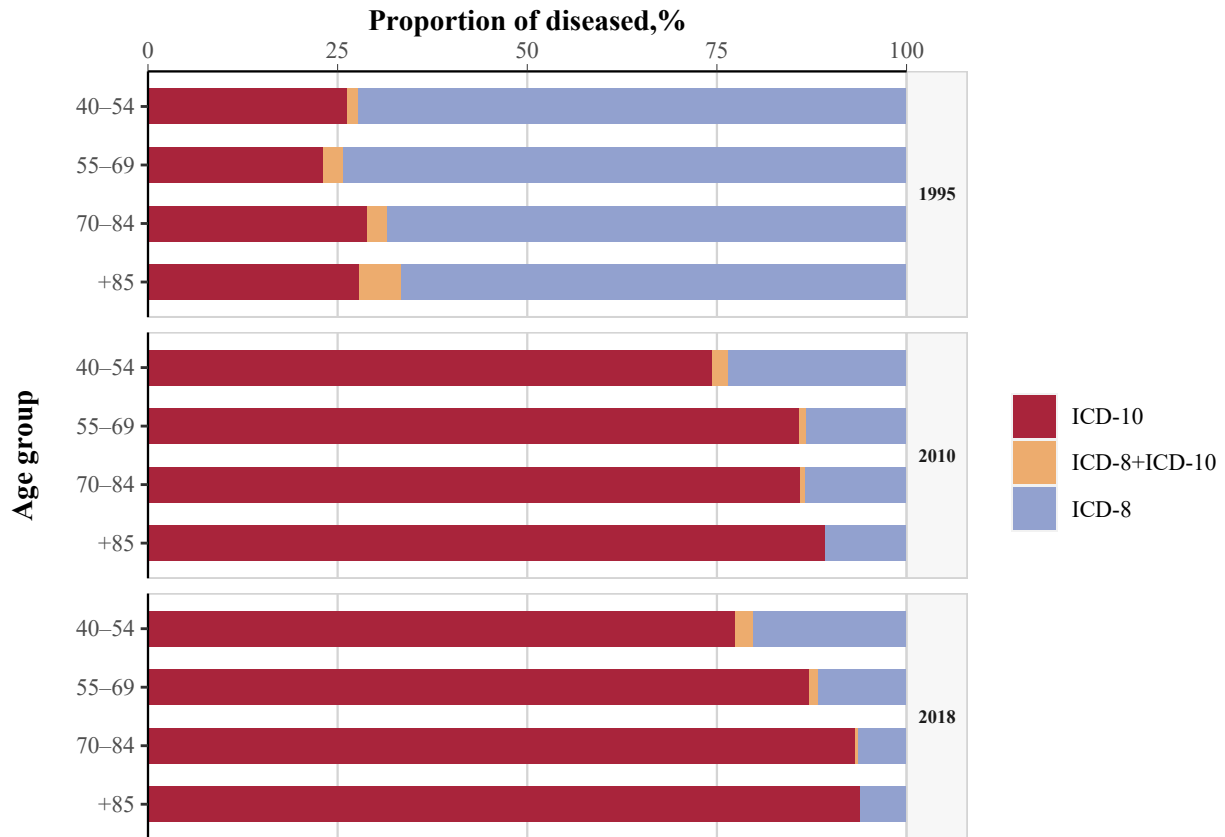

**Figure S36. Renal disease.** Proportion of persons identified with ICD-10 codes only, ICD-8 and ICD-10 codes, or ICD-8 codes only. Grouped by age group and sample year.

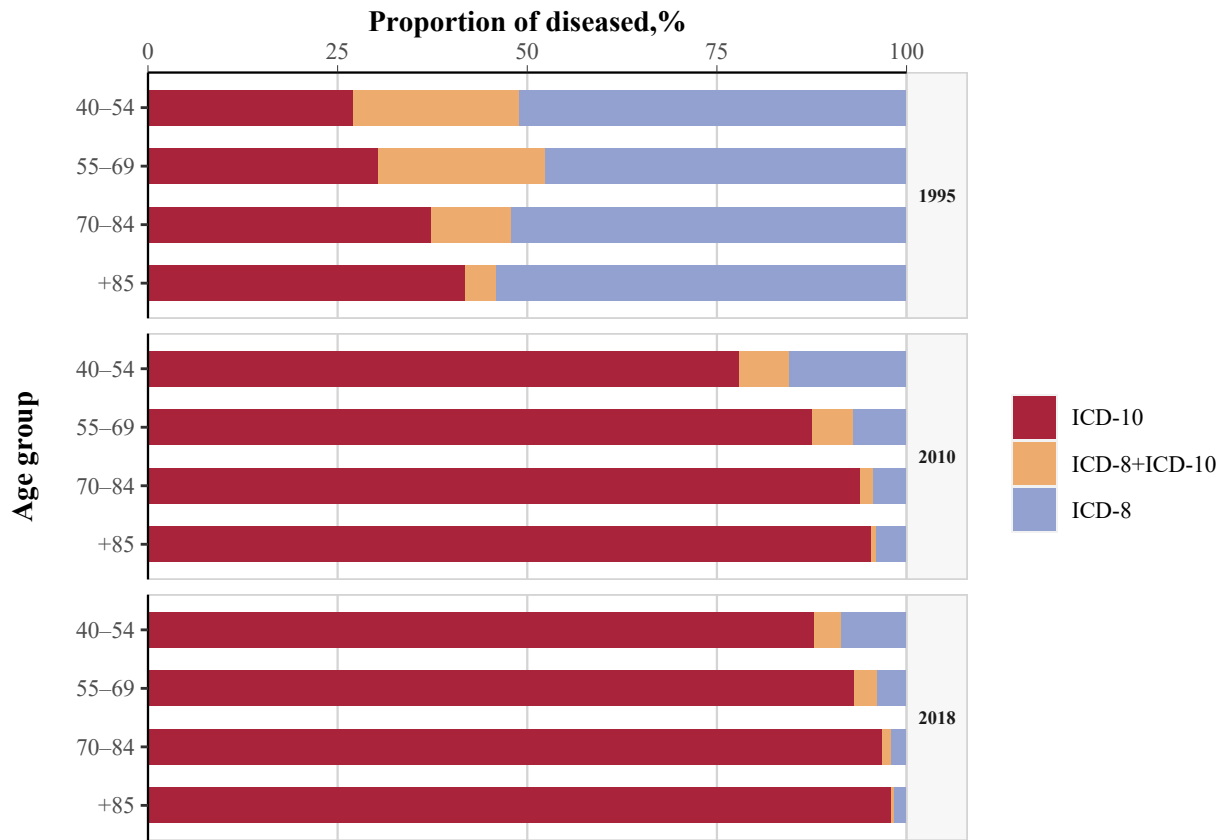

## Stratified by sex

**Figure S37. Cardiovascular diseases.**

Proportion of persons identified with ICD-10 codes only, ICD-8 and ICD-10 codes, or ICD-8 codes only. Grouped by diseases and sample year. For females and males separately.

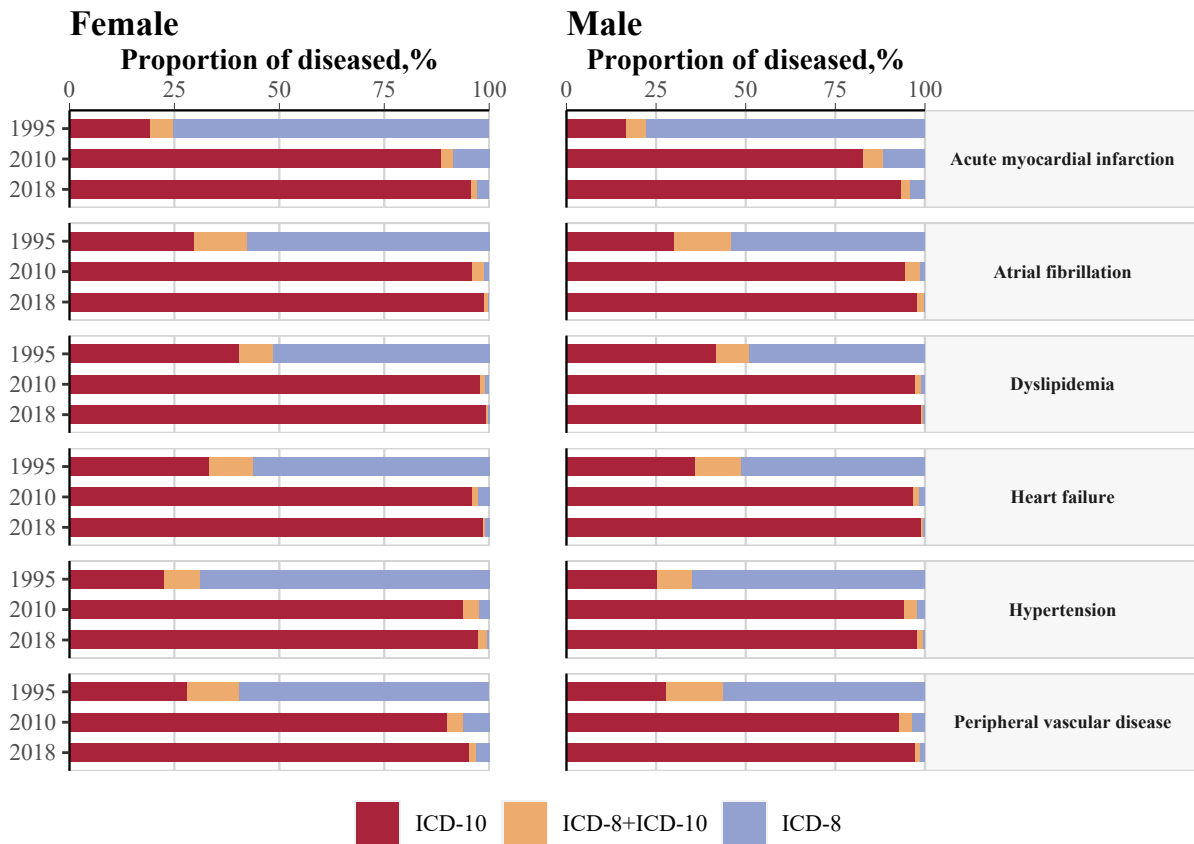

**Figure S38. Endocrine diseases.**

Proportion of persons identified with ICD-10 codes only, ICD-8 and ICD-10 codes, or ICD-8 codes only. Grouped by diseases and sample year. For females and males separately.

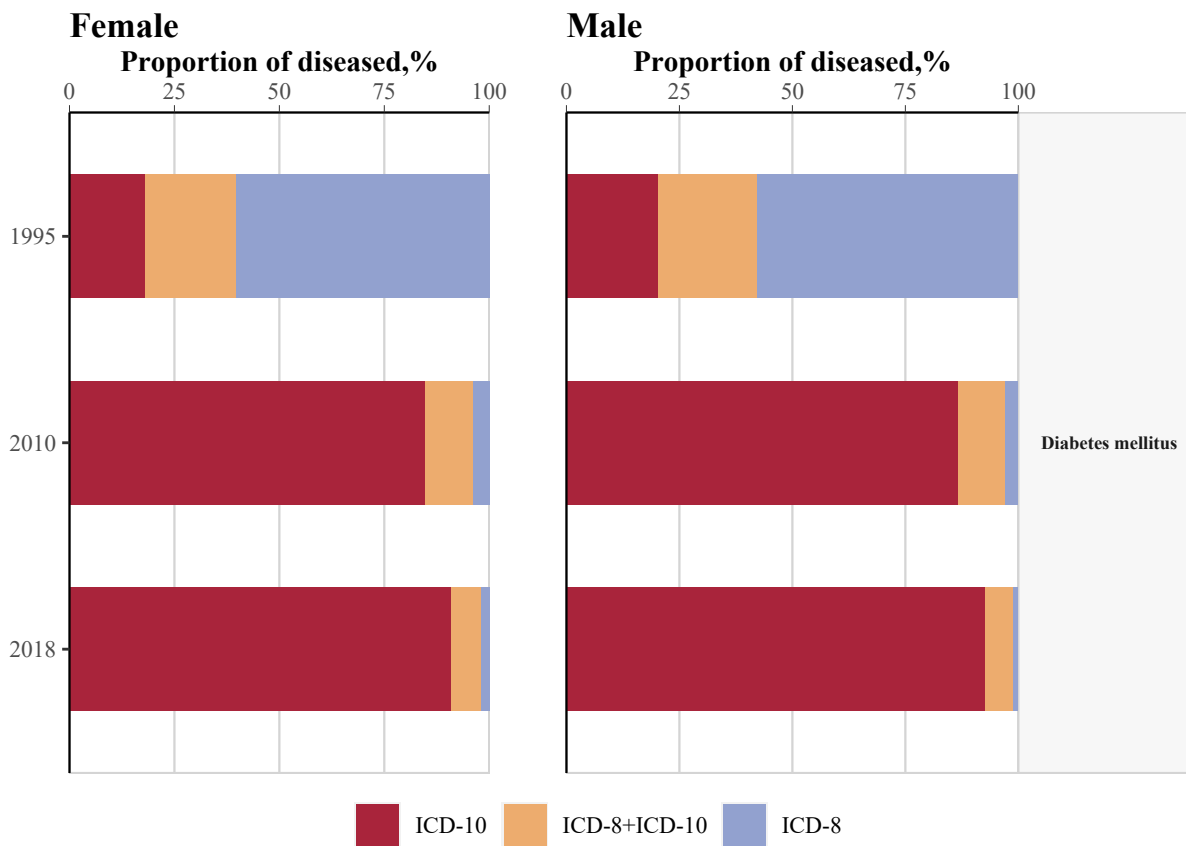

**Figure S39. Gastrointestinal diseases.**

Proportion of persons identified with ICD-10 codes only, ICD-8 and ICD-10 codes, or ICD-8 codes only. Grouped by diseases and sample year. For females and males separately.

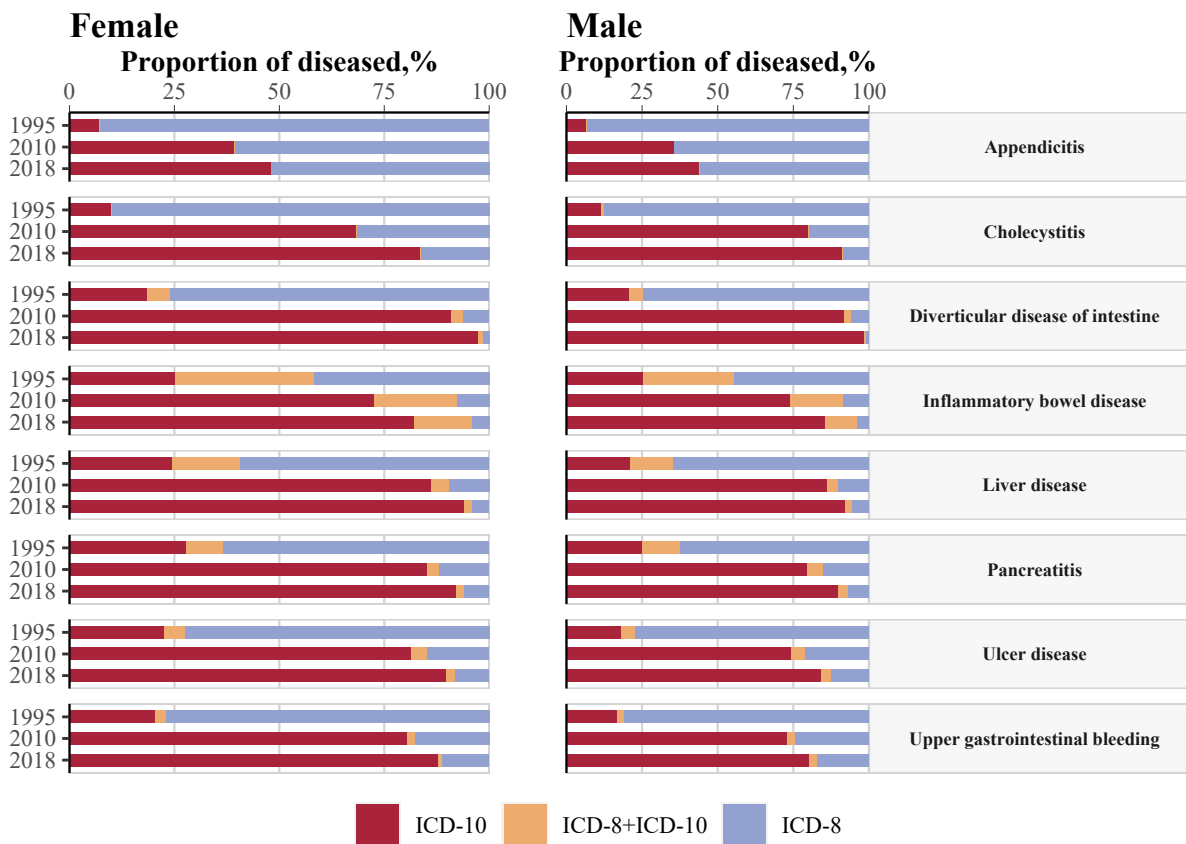

**Figure S40. Neurological diseases.**

Proportion of persons identified with ICD-10 codes only, ICD-8 and ICD-10 codes, or ICD-8 codes only. Grouped by diseases and sample year. For females and males separately.

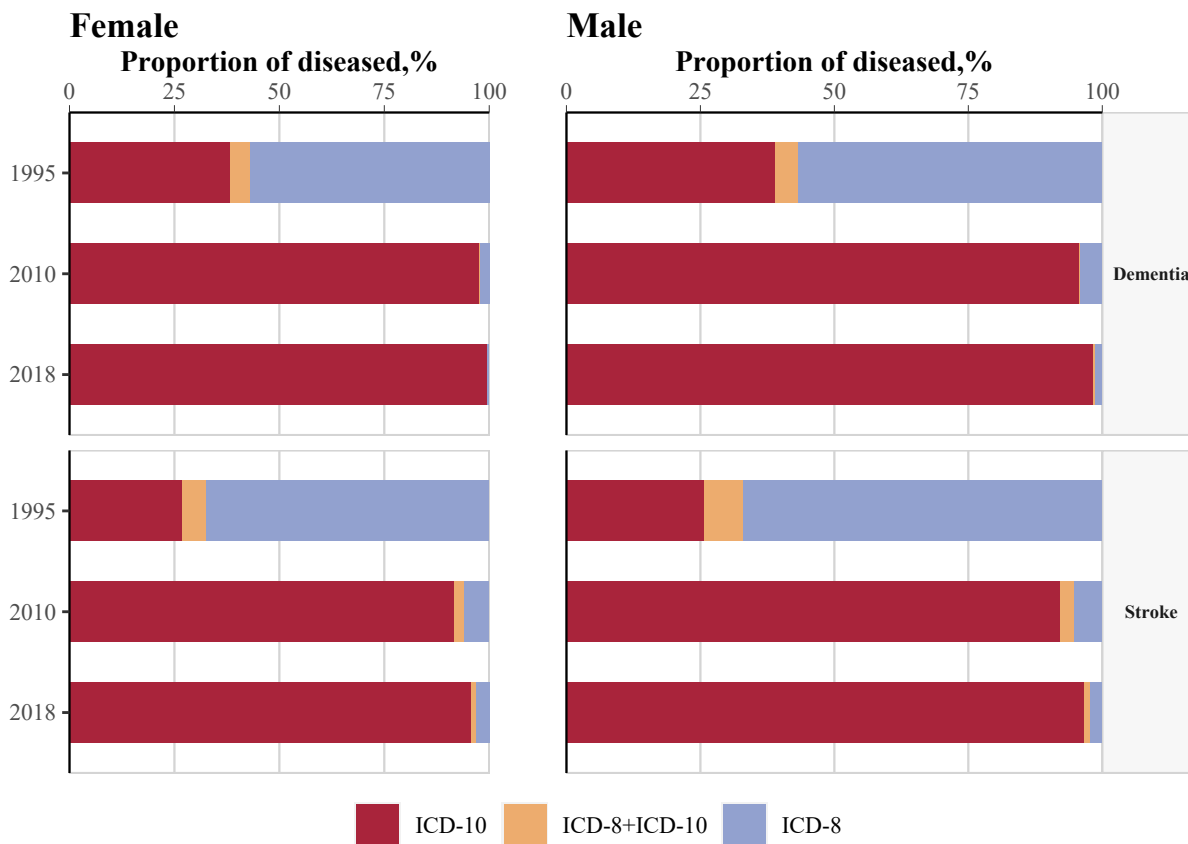



**Figure S41. Fractures.**

Proportion of persons identified with ICD-10 codes only, ICD-8 and ICD-10 codes, or ICD-8 codes only. Grouped by diseases and sample year. For females and males separately.

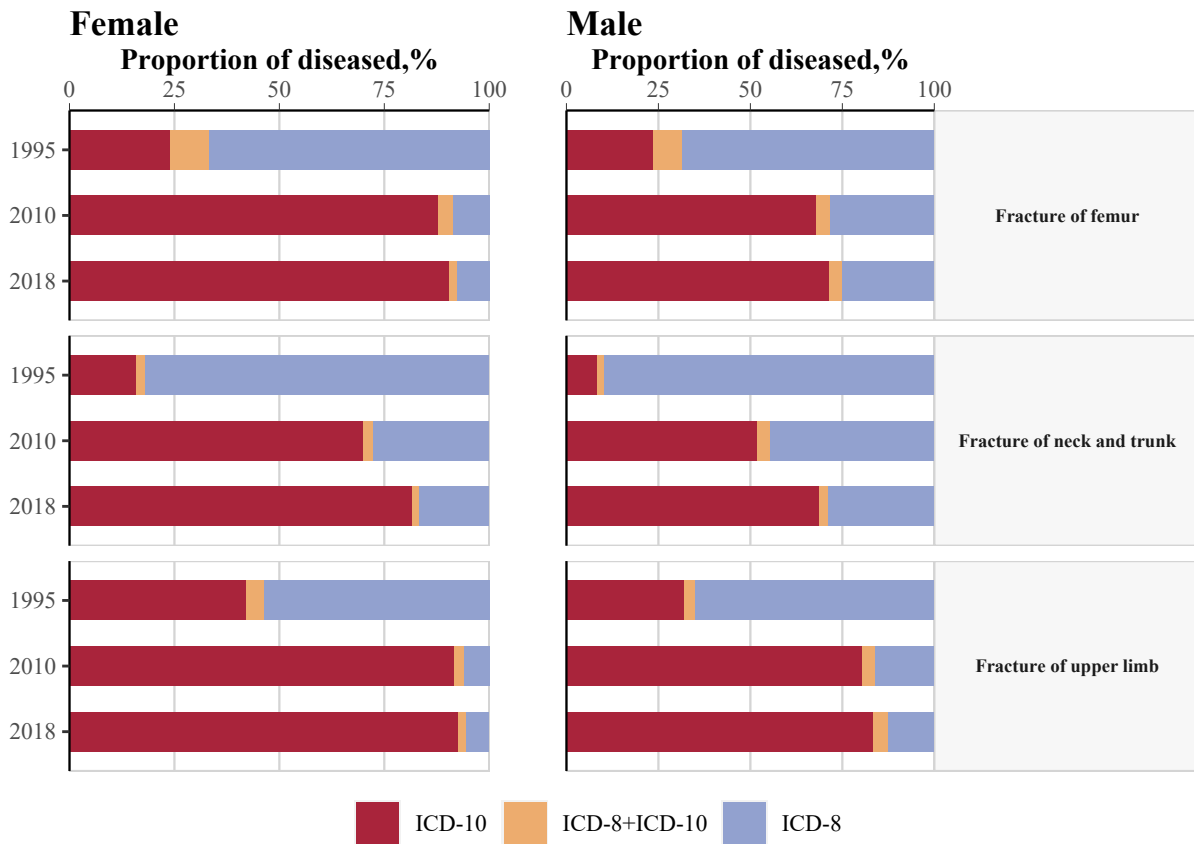

**Figure S42. Pulmonary diseases.**

Proportion of persons identified with ICD-10 codes only, ICD-8 and ICD-10 codes, or ICD-8 codes only. Grouped by diseases and sample year. For females and males separately.

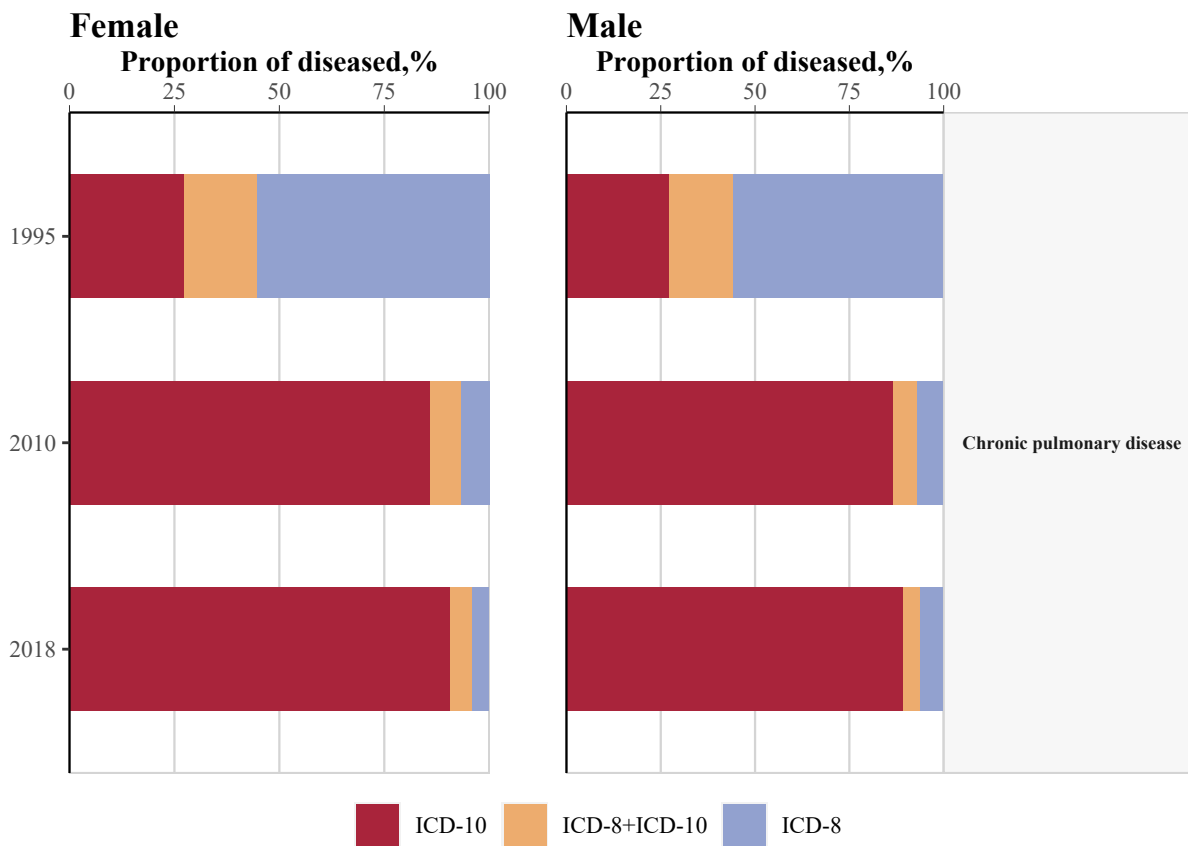

**Figure S43. Rheumatic diseases.**

Proportion of persons identified with ICD-10 codes only, ICD-8 and ICD-10 codes, or ICD-8 codes only. Grouped by diseases and sample year. For females and males separately.

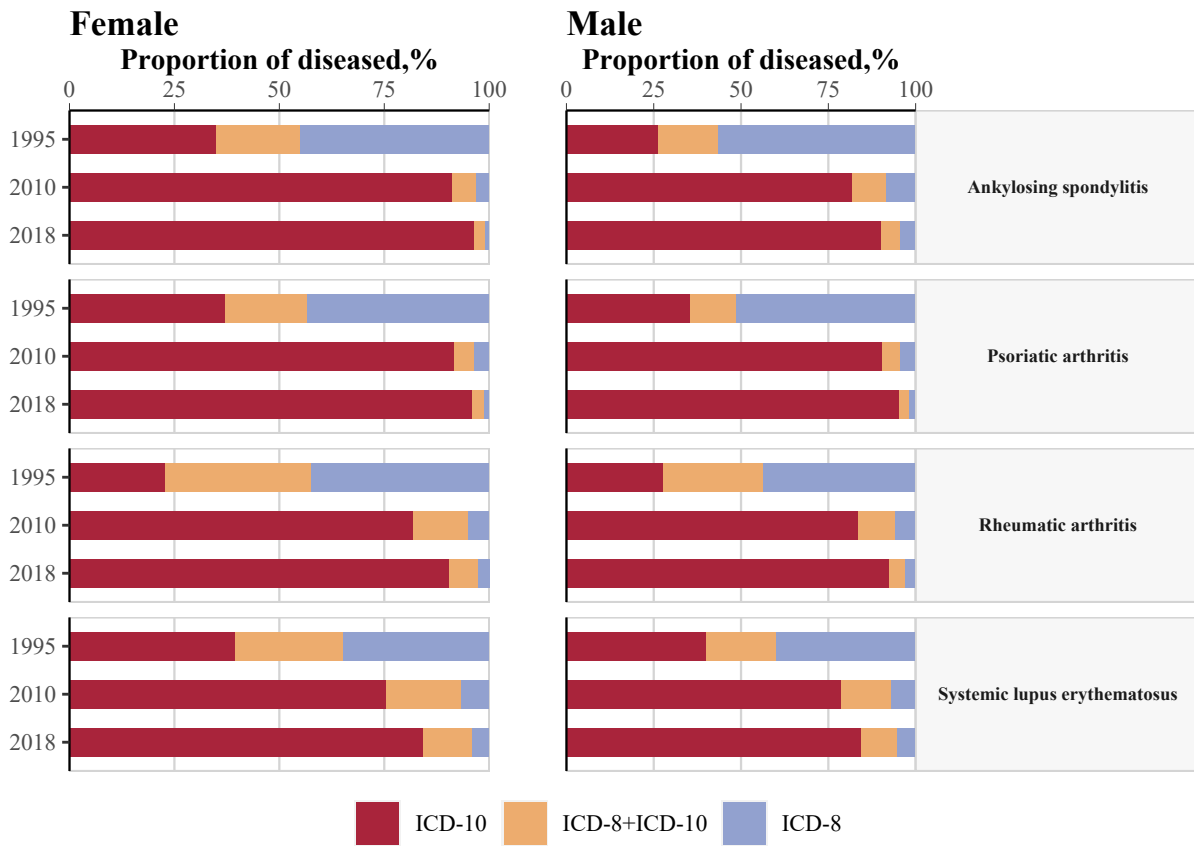

**Figure S44. Urogenital diseases.**

Proportion of persons identified with ICD-10 codes only, ICD-8 and ICD-10 codes, or ICD-8 codes only. Grouped by diseases and sample year. For females and males separately.

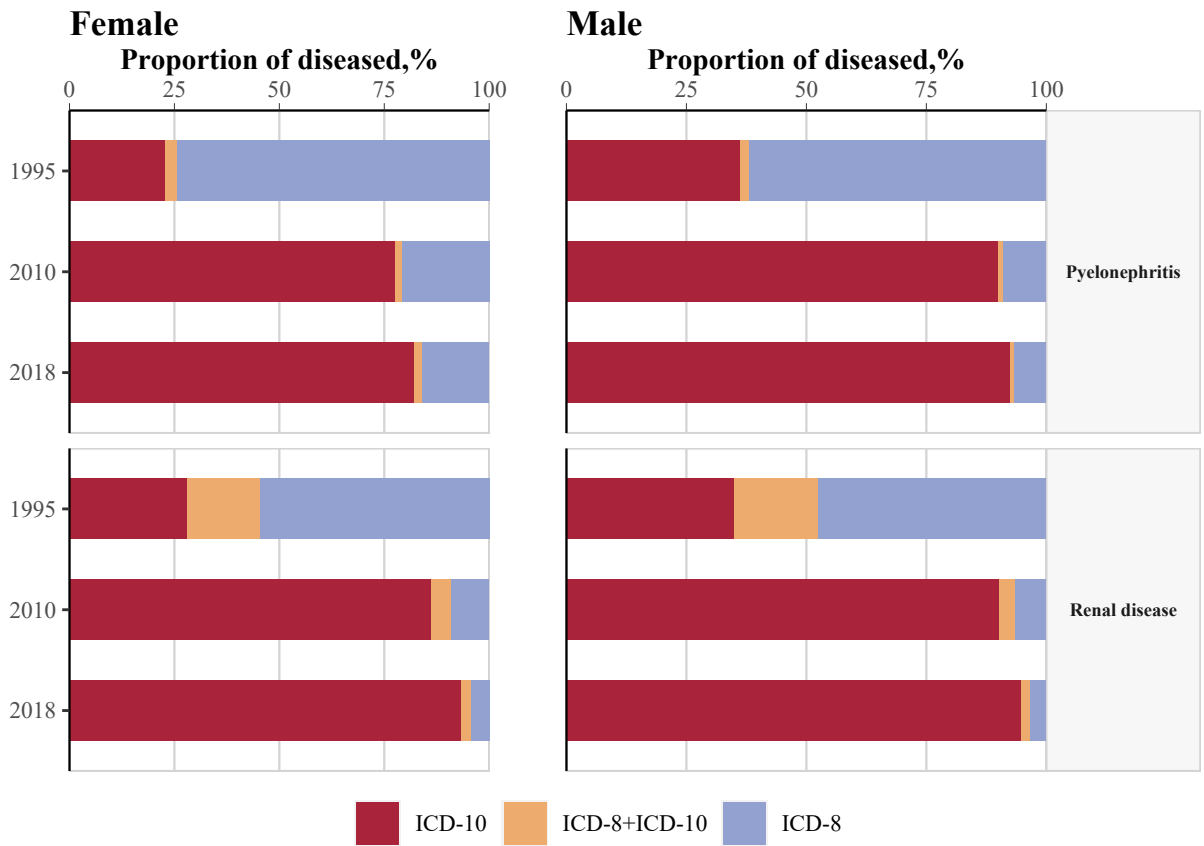

Supplement: Supplementary file 1 [file get_supplementary_file.php]
